# Supplementary material for: A thermophysical investigation of weakly coordinated metals in ionic liquids
Source: Royal Society of Chemistry journal article supplement (doi:10.1039/d4sc03588g), 2024-01-01
Supplement: d4sc03588g1.pdf [file d4sc03588g1.pdf]

# Supporting Information

## A Thermophysical Investigation of Weakly Coordinated Metals in Ionic Liquids

Coby J. Clarke,\*<sup>a</sup> Thomas Clayton,<sup>a</sup> Matthew J. Palmer,<sup>a</sup> Kevin R. J. Lovelock<sup>b</sup> and Peter  
Licence<sup>a</sup>

*(a) Department of Chemistry, The University of Nottingham, Nottingham, UK*

*(b) Department of Chemistry, University of Reading, Reading, UK*

\*Correspondence: [coby.clarke@nottingham.ac.uk](mailto:coby.clarke@nottingham.ac.uk)

# 1. Experimental

## Synthesis and Analysis

Anhydrous metal bis(trifluoromethanesulfonyl)imide salts ( $M[\text{NTf}_2]_n$ ;  $\geq 99.9\%$  purity) were purchased from either Solvionic or Sigma Aldrich and dried on a Schlenk line at  $<2 \times 10^{-2}$  mbar and  $70^\circ\text{C}$  for at least 48 hr before being loaded and stored in an MBraun LABstar glovebox ( $< 0.5$  ppm  $\text{O}_2$  and  $< 0.5$  ppm  $\text{H}_2\text{O}$ ). 1-Butyl-3-methylimidazolium chloride ( $[\text{C}_4\text{C}_1\text{Im}]\text{Cl}$ ) was prepared according to published procedures.<sup>1</sup> 1-octyl-3-methylimidazolium chloride ( $[\text{C}_8\text{C}_1\text{Im}]\text{Cl}$ ), 1-octyl-3-methylimidazolium bromide ( $[\text{C}_8\text{C}_1\text{Im}]\text{Br}$ ), and 1-Ethyl-3-methylimidazolium bis(trifluoromethanesulfonyl)imide ( $[\text{C}_2\text{C}_1\text{Im}][\text{NTf}_2]$ ) were purchased from Sigma Aldrich. All other bis(trifluoromethanesulfonyl)imide ionic liquids (ILs) were prepared by ion metathesis from halide ILs in  $18.2 \text{ M}\Omega \text{ cm}^{-1}$  ultra-pure water from lithium bis(trifluoromethanesulfonyl)imide (1.2 equivalents) according to existing published procedures. Residual halide content was measured by ion chromatography (IC) and all ILs were found to contain less than 1.4 ppm halides (the detection limit of the IC).<sup>2</sup> Purity was also assessed by  $^1\text{H}$ ,  $^{13}\text{C}$ , and  $^{19}\text{F}$  NMR before ILs were used. All ionic liquids were dried on a Schlenk line at  $<2 \times 10^{-2}$  mbar and  $70^\circ\text{C}$  for 48-72 hr before being loaded into the same glovebox. Metal ionic liquids were prepared by weighing the calculated amounts into screw top glass vials which were stirred and heated to  $70^\circ\text{C}$  for 24-48 hr until clear solutions were obtained. A detailed method has been published elsewhere.<sup>3</sup> Metal ILs were analysed by  $^1\text{H}$ ,  $^{13}\text{C}$ , and  $^{19}\text{F}$  NMR after preparation to ensure solutions had not decomposed during heating.

NMR was measured using a Bruker AV(III)400HD spectrometer equipped with a 5 mm autotune broadband probe with z gradients. Samples were dissolved in deuterated solvents (usually  $\text{DMSO-}d_6$ ) to approximately  $20\text{-}30 \text{ mg mL}^{-1}$  concentration and spectra were referenced to the residual solvent peaks in Mestrenova before processing. Differential scanning calorimetry (DSC) was carried out with a TA Instruments Discovery DSC2500 with RCS-90 chiller. Approximately 3-5 mg of sample was used for standard experiments and the instrument was calibrated before use (baseline conditioning, temperature calibration, cell constant, reversing heat capacity calibration, and MDSC calibration with indium and sapphire calibration standards). Dry nitrogen gas was used for all experiments at  $50 \text{ mL min}^{-1}$  and samples were sealed in pre-weighed Tzero alodined hermetic pans in a glovebox and removed one at a time for analysis. Preliminary experiments were done in pin hole pans to allow an initial drying step ( $110^\circ\text{C}$  for 60 min) to drive water from the samples (i.e., *in situ* drying) and to erase the thermal history. Glass transition temperatures ( $T_g$ ) were measured from thermograms with  $10^\circ\text{C min}^{-1}$  heating rates. Heat capacities ( $C_p^o$ ) were measured with approximately 15-20 mg of glovebox sealed sample. Quasi-isothermal modulated DSC (QIMDSC) was used to  $C_p^o$  values which were recorded in  $20^\circ\text{C}$  increments from  $20^\circ\text{C}$  to  $140^\circ\text{C}$ . A temperature amplitude of  $1.00^\circ\text{C}$  and period = 120 s was used for temperature modulation and 10-minute isothermals steps were used to acquire  $C_p^o$ . To assess reproducibility, three separate sample pans containing  $[\text{C}_8\text{C}_1\text{Im}][\text{NTf}_2]$  were analysed and the  $C_p^o$  at  $25^\circ\text{C}$  was  $714.0 \pm 0.8 \text{ J mol}^{-1} \text{ }^\circ\text{C}^{-1}$  and the  $\Delta C_p^o$  from  $140$  to  $25^\circ\text{C}$  was calculated to be  $98.1 \pm 1.2 \text{ J mol}^{-1} \text{ }^\circ\text{C}^{-1}$  (note: the error is the standard deviation of the average values; for  $\Delta C_p^o$  error was propagated by the square root of the sum of the squares). The low standard deviation values showed that the measurements had high reproducibility and low error. Thermogravimetric analysis (TGA) was acquired using a TA Instruments Discovery TGA with high temperature Pt pans and nitrogen flow rate of  $50 \text{ mL min}^{-1}$ . For ramping experiments, samples were dried *in situ* for 60 minutes at  $110\text{-}140^\circ\text{C}$  before heating at a rate of  $10^\circ\text{C min}^{-1}$ .

Kinetic analysis was carried through either modulated TGA (MTGA) or an isothermal method. For MTGA, a period of 200 s and a modulation temperature of 5 °C was used. Hi-Res ramping at 2 °C min<sup>-1</sup> with a resolution of 6.00 and sensitivity of 1.00 was also used to improve data quality. Activation energies ( $E_a$ ) were calculated centred around 10 % mass loss over a 20 min window. The isothermal method used a stepwise temperature programme that increased in 15 °C increments every 45-60 minutes. The isothermal data was analysed according to previous methods to calculate the Arrhenius activation energies and  $T_{0.01/10}$  values.

Dynamic viscosity, kinematic viscosity, and density were measured using an Anton Paar SVM 3000 Viscometer in 5 °C or 10 °C increments from 20-70 °C. Approximately 3 mL of IL was taken up into a syringe in a glovebox, which was sealed in nitrogen, removed from the glovebox and then injected directly into the instrument through a septum within 1 minute. Reproducibility was measured using triplicate injections of  $[C_4C_1Im][NTf_2]$  and errors were found to be 0.24 % viscosity, 0.32 % kinematic, and 0.0237 g cm<sup>-3</sup> for density. Three coefficient Vogel-Fulcher-Tammann (VFT) fittings were calculated in Igor Pro by non-linear least squares data fitting the expression:

$$\ln(\eta) = A + \frac{B}{T-T_0} \quad (\text{Equation 1})$$

Where  $\eta$  = dynamic viscosity,  $T$  = temperature,  $A$  is a constant and taking  $e^A = A_\infty$  gives  $A_\infty$  the viscosity at infinite temperature,  $B$  is a constant and related to the Arrhenius activation energy<sup>4</sup> (i.e., a pseudo-activation energy), and  $T_0$  is a constant and termed the Vogel temperature. The Fragility parameter,  $D$ , was calculated from  $B/T_0$  and this parameter describes how rapidly dynamics of a liquid slow down as temperature approaches the glass transition — smaller  $D$  means viscosity is sensitive to temperature changes which is termed “fragile behaviour”, but large  $D$  means less sensitive to temperature, and this is termed “strong behaviour”. Strong liquids obey Arrhenius kinetics better than fragile liquids at low temperatures. Ionic liquid physical properties correlate very well to their molecular or molar volumes, which are both calculated from their respective ionic volumes.<sup>5</sup> In this work, molar volumes ( $V_m$ ) of MILs were calculated from ionic volumes weighted according to  $\chi$  and values for IL ions were taken from published reference tables.<sup>6</sup> The ionic volumes of metals were assumed to be the same as those in the metallic state so were calculated from the molar volumes of pure metals<sup>7</sup> at 25 °C, similar to other work.<sup>8</sup> The molar volume correlation factor published by Marcus<sup>6</sup> was used to account for deviations between IL calculated and experimental molar volumes by multiplying the obtained values by 689.5 rather than 602.2:

$$V_m = 689.5 * ((1 - \chi)(V_{cation}^+ + V_{anion}^-) + \chi(V_{metal}^{n+} + nV_{anion}^-)) \quad (\text{Equation 2})$$

## NMR Reports

**$[C_2C_1Im][NTf_2]$ :** <sup>1</sup>H NMR (400 MHz, DMSO)  $\delta$  = 9.10 (d,  $J$  = 1.7 Hz, 1H), 7.77 (t,  $J$  = 1.8 Hz, 1H), 7.68 (t,  $J$  = 1.8 Hz, 1H), 4.18 (q,  $J$  = 7.3 Hz, 2H), 3.84 (s, 3H), 1.41 (t,  $J$  = 7.3 Hz, 3H). <sup>13</sup>C NMR (101 MHz, DMSO)  $\delta$  = 136.49, 123.61, 122.26, 119.50 (q,  $J$  = 321.9 Hz), 48.79, 35.74, 31.16, 29.38, 28.47, 28.33, 25.49, 22.05, 13.91. <sup>19</sup>F NMR (376 MHz, DMSO)  $\delta$  = -78.73.

**$[C_2C_1Im][NTf_2]_{0.33}Zn[NTf_2]_2$ :** <sup>1</sup>H NMR (400 MHz, DMSO)  $\delta$  = 9.10 (s, 1H), 7.77 (t,  $J$  = 1.8 Hz, 1H), 7.68 (t,  $J$  = 1.8 Hz, 1H), 4.19 (q,  $J$  = 7.3 Hz, 2H), 3.84 (s, 3H), 1.42 (t,  $J$  = 7.3 Hz, 3H). <sup>13</sup>C NMR (101 MHz, DMSO)  $\delta$  = 136.27, 123.61, 122.00, 119.53 (q,  $J$  = 321.9 Hz), 44.17, 35.72, 15.10. <sup>19</sup>F NMR (376 MHz, DMSO)  $\delta$  = -78.74.

**$[C_4C_1Im]Cl$ :** <sup>1</sup>H NMR (400 MHz, DMSO)  $\delta$  = 9.24 (d,  $J$  = 1.8 Hz, 1H), 7.80 (t,  $J$  = 1.8 Hz, 1H), 7.73 (t,  $J$  = 1.8 Hz, 1H), 4.17 (t,  $J$  = 7.2 Hz, 2H), 3.85 (s, 3H), 1.82 – 1.70 (m, 2H), 1.26 (h,  $J$  = 7.4 Hz, 2H), 0.90 (t,  $J$

= 7.4 Hz, 3H).  $^{13}\text{C}$  NMR (101 MHz, DMSO)  $\delta$  = 136.58, 123.60, 122.26, 48.44, 35.73, 31.35, 18.76, 13.27.

**[C<sub>4</sub>C<sub>1</sub>Im][NTf<sub>2</sub>]**:  $^1\text{H}$  NMR (400 MHz, DMSO)  $\delta$  = 9.09 (d,  $J$  = 1.8 Hz, 1H), 7.76 (t,  $J$  = 1.8 Hz, 1H), 7.69 (d,  $J$  = 1.9 Hz, 1H), 4.15 (t,  $J$  = 7.2 Hz, 2H), 3.84 (s, 3H), 1.82 – 1.70 (m, 2H), 1.26 (h,  $J$  = 7.4 Hz, 2H), 0.90 (t,  $J$  = 7.4 Hz, 3H).  $^{13}\text{C}$  NMR (101 MHz, DMSO)  $\delta$  = 136.49, 123.62, 122.26, 121.08, 117.88, 48.49, 35.73, 31.34, 18.76, 13.24.

**[C<sub>4</sub>C<sub>1</sub>Im][NTf<sub>2</sub>]<sub>0.33</sub>Zn[NTf<sub>2</sub>]<sub>2</sub>**:  $^1\text{H}$  NMR (400 MHz, DMSO)  $\delta$  = 9.09 (s, 1H), 7.75 (t,  $J$  = 1.8 Hz, 1H), 7.68 (t,  $J$  = 1.8 Hz, 1H), 4.15 (t,  $J$  = 7.2 Hz, 2H), 3.84 (s, 3H), 1.82 – 1.69 (m, 2H), 1.32 – 1.18 (m, 2H), 0.90 (t,  $J$  = 7.4 Hz, 3H).  $^{13}\text{C}$  NMR (101 MHz, DMSO)  $\delta$  = 136.53, 123.65, 122.29, 119.52 (q,  $J$  = 321.8 Hz), 48.54, 35.76, 31.38, 18.79, 13.26.  $^{19}\text{F}$  NMR (376 MHz, DMSO)  $\delta$  = -78.73.

**[C<sub>8</sub>C<sub>1</sub>Im]Cl**:  $^1\text{H}$  NMR (400 MHz, DMSO)  $\delta$  = 9.27 (d,  $J$  = 1.8 Hz, 1H), 7.80 (t,  $J$  = 1.8 Hz, 1H), 7.73 (t,  $J$  = 1.8 Hz, 1H), 4.16 (t,  $J$  = 7.2 Hz, 2H), 3.85 (s, 3H), 1.77 (p,  $J$  = 7.3 Hz, 2H), 1.32 – 1.15 (m, 10H), 0.89 – 0.80 (m, 3H).  $^{13}\text{C}$  NMR (101 MHz, DMSO)  $\delta$  = 136.58, 123.59, 122.26, 48.72, 35.73, 31.16, 29.39, 28.48, 28.34, 25.49, 22.06, 13.95.

**[C<sub>8</sub>C<sub>1</sub>Im][NTf<sub>2</sub>]**:  $^1\text{H}$  NMR (400 MHz, DMSO)  $\delta$  = 9.09 (d,  $J$  = 1.8 Hz, 1H), 7.75 (t,  $J$  = 1.8 Hz, 1H), 7.69 (t,  $J$  = 1.8 Hz, 1H), 4.14 (t,  $J$  = 7.2 Hz, 2H), 3.84 (s, 3H), 1.77 (p,  $J$  = 7.2 Hz, 2H), 1.25 (q,  $J$  = 12.4, 9.1 Hz, 10H), 0.86 (t,  $J$  = 6.8 Hz, 3H).  $^{13}\text{C}$  NMR (101 MHz, DMSO)  $\delta$  = 136.48, 123.60, 122.25, 119.48 (q,  $J$  = 321.9 Hz), 48.78, 35.72, 31.14, 29.36, 28.45, 28.31, 25.48, 22.03, 13.88.  $^{19}\text{F}$  NMR (376 MHz, DMSO)  $\delta$  = -78.75.

**[C<sub>8</sub>C<sub>1</sub>Im][NTf<sub>2</sub>]<sub>0.1</sub>Li[NTf<sub>2</sub>]<sub>2</sub>**:  $^1\text{H}$  NMR (400 MHz, DMSO)  $\delta$  = 9.09 (s, 1H), 7.75 (d,  $J$  = 1.7 Hz, 1H), 7.68 (d,  $J$  = 1.7 Hz, 1H), 4.14 (t,  $J$  = 7.2 Hz, 2H), 3.84 (s, 3H), 1.77 (p,  $J$  = 7.2 Hz, 2H), 1.26 (q,  $J$  = 5.4, 4.9 Hz, 11H), 0.85 (t,  $J$  = 6.6 Hz, 3H).  $^{13}\text{C}$  NMR (101 MHz, DMSO)  $\delta$  = 136.49, 123.60, 122.25, 119.49 (q,  $J$  = 321.9 Hz), 48.79, 35.72, 31.15, 29.37, 28.46, 28.32, 25.49, 22.04, 13.88.  $^{19}\text{F}$  NMR (376 MHz, DMSO)  $\delta$  = -78.76.

**[C<sub>8</sub>C<sub>1</sub>Im][NTf<sub>2</sub>]<sub>0.15</sub>Li[NTf<sub>2</sub>]<sub>2</sub>**:  $^1\text{H}$  NMR (400 MHz, DMSO)  $\delta$  = 9.09 (s, 1H), 7.74 (d,  $J$  = 1.8 Hz, 1H), 7.67 (d,  $J$  = 1.8 Hz, 1H), 4.15 (t,  $J$  = 7.2 Hz, 2H), 3.85 (s, 3H), 1.78 (p,  $J$  = 7.2 Hz, 2H), 1.34 – 1.17 (m, 10H), 0.85 (t,  $J$  = 6.7 Hz, 3H).  $^{13}\text{C}$  NMR (101 MHz, DMSO)  $\delta$  = 136.51, 123.60, 122.26, 119.53 (q,  $J$  = 321.9 Hz), 48.83, 35.70, 31.17, 29.40, 28.48, 28.34, 25.50, 22.05, 13.83.  $^{19}\text{F}$  NMR (376 MHz, DMSO)  $\delta$  = -78.84.

**[C<sub>8</sub>C<sub>1</sub>Im][NTf<sub>2</sub>]<sub>0.27</sub>Li[NTf<sub>2</sub>]<sub>2</sub>**:  $^1\text{H}$  NMR (400 MHz, DMSO)  $\delta$  = 9.09 (s, 1H), 7.74 (d,  $J$  = 1.8 Hz, 1H), 7.67 (d,  $J$  = 1.8 Hz, 1H), 4.14 (t,  $J$  = 7.2 Hz, 2H), 3.84 (s, 3H), 1.78 (p,  $J$  = 7.2 Hz, 2H), 1.25 (dh,  $J$  = 13.9, 6.7 Hz, 10H), 0.85 (t,  $J$  = 6.7 Hz, 3H).  $^{13}\text{C}$  NMR (101 MHz, DMSO)  $\delta$  = 136.53, 123.61, 122.27, 119.54 (q,  $J$  = 321.8 Hz), 48.84, 35.72, 31.18, 29.41, 28.49, 28.35, 25.51, 22.06, 13.85.  $^{19}\text{F}$  NMR (376 MHz, DMSO)  $\delta$  = -78.84.

**[C<sub>8</sub>C<sub>1</sub>Im][NTf<sub>2</sub>]<sub>0.33</sub>Li[NTf<sub>2</sub>]<sub>2</sub>**:  $^1\text{H}$  NMR (400 MHz, DMSO)  $\delta$  = 9.09 (s, 1H), 7.73 (d,  $J$  = 1.8 Hz, 1H), 7.67 (d,  $J$  = 1.8 Hz, 1H), 4.14 (t,  $J$  = 7.2 Hz, 2H), 3.84 (s, 2H), 1.78 (p,  $J$  = 7.1 Hz, 2H), 1.34 – 1.16 (m, 10H), 0.85 (t,  $J$  = 6.7 Hz, 3H).  $^{13}\text{C}$  NMR (101 MHz, DMSO)  $\delta$  = 136.55, 123.63, 122.28, 119.57 (q,  $J$  = 321.9 Hz), 48.87, 35.73, 31.20, 29.43, 28.51, 28.37, 25.53, 22.08, 13.85.  $^{19}\text{F}$  NMR (376 MHz, DMSO)  $\delta$  = -78.86.

**[C<sub>8</sub>C<sub>1</sub>Im][NTf<sub>2</sub>]<sub>0.1</sub>Mg[NTf<sub>2</sub>]<sub>2</sub>**:  $^1\text{H}$  NMR (400 MHz, DMSO)  $\delta$  = 9.08 (s, 1H), 7.74 (d,  $J$  = 1.8 Hz, 1H), 7.67 (d,  $J$  = 1.7 Hz, 1H), 4.14 (t,  $J$  = 7.2 Hz, 2H), 3.84 (s, 3H), 1.78 (p,  $J$  = 7.2 Hz, 2H), 1.25 (dh,  $J$  = 13.8, 6.8 Hz, 10H), 0.85 (t,  $J$  = 6.6 Hz, 3H).  $^{13}\text{C}$  NMR (101 MHz, DMSO)  $\delta$  = 136.54, 123.64, 122.29, 119.56 (q,  $J$  = 321.9 Hz), 48.87, 35.74, 31.20, 29.43, 28.51, 28.37, 25.54, 22.08, 13.87.  $^{19}\text{F}$  NMR (376 MHz, DMSO)  $\delta$  = -78.83.

**[C<sub>8</sub>C<sub>1</sub>Im][NTf<sub>2</sub>]<sub>0.15</sub>Mg[NTf<sub>2</sub>]<sub>2</sub>**: <sup>1</sup>H NMR (400 MHz, DMSO) δ = 9.09 (s, 1H), 7.74 (d, *J* = 1.8 Hz, 1H), 7.68 (d, *J* = 1.8 Hz, 1H), 4.14 (t, *J* = 7.2 Hz, 2H), 3.84 (s, 3H), 1.78 (p, *J* = 7.2 Hz, 2H), 1.25 (dh, *J* = 14.8, 6.9 Hz, 10H), 0.85 (t, *J* = 6.6 Hz, 3H). <sup>13</sup>C NMR (101 MHz, DMSO) δ = 136.52, 123.62, 122.28, 119.53 (q, *J* = 321.7 Hz), 48.83, 35.73, 31.18, 29.41, 28.49, 28.35, 25.51, 22.07, 13.88. <sup>19</sup>F NMR (376 MHz, DMSO) δ = -78.80.

**[C<sub>8</sub>C<sub>1</sub>Im][NTf<sub>2</sub>]<sub>0.27</sub>Mg[NTf<sub>2</sub>]<sub>2</sub>**: <sup>1</sup>H NMR (400 MHz, DMSO) δ = 9.09 (s, 1H), 7.75 (d, *J* = 1.7 Hz, 1H), 7.68 (d, *J* = 1.8 Hz, 1H), 4.14 (t, *J* = 7.2 Hz, 2H), 3.84 (s, 3H), 1.77 (p, *J* = 7.2 Hz, 2H), 1.25 (p, *J* = 9.6, 7.9 Hz, 11H), 0.85 (t, *J* = 6.6 Hz, 3H). <sup>13</sup>C NMR (101 MHz, DMSO) δ = 136.50, 123.62, 122.27, 119.51 (q, *J* = 321.9 Hz), 48.80, 35.74, 31.17, 29.39, 28.47, 28.33, 25.50, 22.06, 13.91. <sup>19</sup>F NMR (376 MHz, DMSO) δ = -78.74.

**[C<sub>8</sub>C<sub>1</sub>Im][NTf<sub>2</sub>]<sub>0.33</sub>Mg[NTf<sub>2</sub>]<sub>2</sub>**: <sup>1</sup>H NMR (400 MHz, DMSO) δ = 9.09 (s, 1H), 7.74 (t, *J* = 1.8 Hz, 1H), 7.67 (d, *J* = 1.8 Hz, 1H), 4.14 (t, *J* = 7.2 Hz, 2H), 3.84 (s, 3H), 1.77 (p, *J* = 7.2 Hz, 2H), 1.25 (m, 10H), 0.85 (t, *J* = 6.7 Hz, 3H). <sup>13</sup>C NMR (101 MHz, DMSO) δ = 136.54, 123.65, 122.30, 119.56 (q, *J* = 321.8 Hz), 48.85, 35.76, 31.20, 29.43, 28.51, 28.37, 25.54, 22.09, 13.91. <sup>19</sup>F NMR (376 MHz, DMSO) δ = -78.78.

**[C<sub>8</sub>C<sub>1</sub>Im][NTf<sub>2</sub>]<sub>0.1</sub>Co[NTf<sub>2</sub>]<sub>2</sub>**: <sup>1</sup>H NMR (400 MHz, DMSO) δ = 9.05 (s, 1H), 7.71 (t, *J* = 1.8 Hz, 1H), 7.64 (t, *J* = 1.9 Hz, 1H), 4.10 (t, *J* = 7.2 Hz, 2H), 3.80 (s, 3H), 1.83 – 1.61 (m, 2H), 1.30 – 1.12 (m, 10H), 0.81 (t, *J* = 6.7 Hz, 3H).

**[C<sub>8</sub>C<sub>1</sub>Im][NTf<sub>2</sub>]<sub>0.15</sub>Co[NTf<sub>2</sub>]<sub>2</sub>**: <sup>1</sup>H NMR (400 MHz, DMSO) δ = 9.00 (d, *J* = 1.7 Hz, 1H), 7.66 (t, *J* = 1.8 Hz, 1H), 7.60 (t, *J* = 1.8 Hz, 1H), 4.06 (t, *J* = 7.2 Hz, 2H), 3.76 (s, 3H), 1.78 – 1.59 (m, 2H), 1.24 – 1.10 (m, 10H), 0.83 – 0.70 (m, 3H). <sup>13</sup>C NMR (101 MHz, DMSO) δ = 134.28, 121.39, 120.04, 117.28 (q, *J* = 321.8 Hz), 46.58, 33.51, 28.94, 27.16, 26.25, 26.11, 23.27, 19.83, 11.68. <sup>19</sup>F NMR (376 MHz, DMSO) δ = -78.80.

**[C<sub>8</sub>C<sub>1</sub>Im][NTf<sub>2</sub>]<sub>0.27</sub>Co[NTf<sub>2</sub>]<sub>2</sub>**: <sup>1</sup>H NMR (400 MHz, DMSO) δ = 8.89 (s, 1H), 7.55 (d, *J* = 2.0 Hz, 1H), 7.48 (d, *J* = 2.0 Hz, 1H), 3.94 (t, *J* = 7.2 Hz, 2H), 3.64 (s, 1H), 1.58 (p, *J* = 7.1 Hz, 2H), 1.05 (d, *J* = 7.7 Hz, 10H), 0.69 – 0.60 (m, 3H). <sup>13</sup>C NMR (101 MHz, DMSO) δ = 131.35, 118.46, 117.11, 114.36 (q, *J* = 321.8 Hz), 43.67, 30.59, 26.02, 24.24, 23.32, 23.18, 20.35, 16.91, 8.75. <sup>19</sup>F NMR (376 MHz, DMSO) δ = -78.88.

**[C<sub>8</sub>C<sub>1</sub>Im][NTf<sub>2</sub>]<sub>0.33</sub>Co[NTf<sub>2</sub>]<sub>2</sub>**: <sup>1</sup>H NMR (400 MHz, DMSO) δ = 8.80 (s, 1H), 7.46 (s, 1H), 7.39 (s, 1H), 3.86 (t, *J* = 7.3 Hz, 2H), 3.56 (s, 3H), 1.48 (q, *J* = 7.1 Hz, 2H), 0.96 (d, *J* = 8.5 Hz, 10H), 0.56 (t, *J* = 6.5 Hz, 3H). <sup>13</sup>C NMR (101 MHz, DMSO) δ = 129.31, 116.42, 115.07, 112.31 (q, *J* = 322.0 Hz), 41.63, 28.55, 23.97, 22.20, 21.28, 21.14, 18.30, 14.86, 6.70. <sup>19</sup>F NMR (376 MHz, DMSO) δ = -78.94.

**[C<sub>8</sub>C<sub>1</sub>Im][NTf<sub>2</sub>]<sub>0.1</sub>Zn[NTf<sub>2</sub>]<sub>2</sub>**: <sup>1</sup>H NMR (400 MHz, DMSO) δ = 9.10 (s, 1H), 7.76 (s, 1H), 7.69 (s, 1H), 4.15 (t, *J* = 7.2 Hz, 2H), 3.85 (s, 3H), 1.96 – 1.66 (m, 2H), 1.42 – 1.12 (m, 11H), 0.86 (d, *J* = 7.2 Hz, 3H). <sup>13</sup>C NMR (101 MHz, DMSO) δ = 135.41, 122.53, 121.18, 118.41 (q, *J* = 321.9 Hz), 47.71, 34.65, 30.07, 28.30, 27.38, 27.24, 24.41, 20.97, 12.82. <sup>19</sup>F NMR (376 MHz, DMSO) δ = -78.75. <sup>19</sup>F NMR (376 MHz, DMSO) δ = -78.76.

**[C<sub>8</sub>C<sub>1</sub>Im][NTf<sub>2</sub>]<sub>0.15</sub>Zn[NTf<sub>2</sub>]<sub>2</sub>**: <sup>1</sup>H NMR (400 MHz, DMSO) δ = 9.09 (s, 1H), 7.75 (t, *J* = 1.8 Hz, 1H), 7.69 (t, *J* = 1.8 Hz, 1H), 4.14 (t, *J* = 7.2 Hz, 2H), 3.84 (s, 3H), 1.89 – 1.67 (m, 2H), 1.25 (d, *J* = 6.4 Hz, 9H), 0.86 (d, *J* = 7.1 Hz, 2H). <sup>13</sup>C NMR (101 MHz, DMSO) δ = 136.49, 123.61, 122.26, 119.50 (q, *J* = 321.9 Hz), 48.79, 35.74, 31.16, 29.38, 28.47, 28.33, 25.49, 22.05, 13.91. <sup>19</sup>F NMR (376 MHz, DMSO) δ = -78.74.

**[C<sub>8</sub>C<sub>1</sub>Im][NTf<sub>2</sub>]<sub>0.27</sub>Zn[NTf<sub>2</sub>]<sub>2</sub>**: <sup>1</sup>H NMR (400 MHz, DMSO) δ = 9.09 (s, 1H), 7.75 (t, *J* = 1.8 Hz, 1H), 7.68 (t, *J* = 1.8 Hz, 1H), 4.14 (t, *J* = 7.2 Hz, 2H), 3.84 (s, 3H), 1.77 (p, *J* = 7.3 Hz, 2H), 1.25 (q, *J* = 11.9, 8.9 Hz, 10H), 0.92 – 0.76 (m, 3H). <sup>13</sup>C NMR (101 MHz, DMSO) δ = 136.50, 123.62, 122.28, 119.51 (q, *J* = 321.9

H<sub>z</sub>), 48.80, 35.74, 31.17, 29.39, 28.48, 28.34, 25.50, 22.06, 13.91. <sup>19</sup>F NMR (376 MHz, DMSO) δ = -78.74.

**[C<sub>8</sub>C<sub>1</sub>Im][NTf<sub>2</sub>]<sub>0.33</sub>Zn[NTf<sub>2</sub>]<sub>2</sub>:** <sup>1</sup>H NMR (400 MHz, DMSO) δ = 9.08 (s, 1H), 7.74 (d, *J* = 1.8 Hz, 1H), 7.67 (d, *J* = 1.8 Hz, 1H), 4.14 (t, *J* = 7.2 Hz, 2H), 3.84 (s, 3H), 1.77 (p, *J* = 7.2 Hz, 2H), 1.26 (m, 10H), 0.85 (t, *J* = 6.7 Hz, 3H). <sup>13</sup>C NMR (101 MHz, DMSO) δ = 136.57, 123.66, 122.32, 119.58 (q, *J* = 321.8 Hz), 48.88, 35.77, 31.22, 29.45, 28.53, 28.39, 25.55, 22.11, 13.92. <sup>19</sup>F NMR (376 MHz, DMSO) δ = -78.80.

**[C<sub>8</sub>C<sub>1</sub>Im][NTf<sub>2</sub>]<sub>0.33</sub>Ni[NTf<sub>2</sub>]<sub>2</sub>:** <sup>1</sup>H NMR (400 MHz, DMSO) δ = 9.06 (s, 1H), 7.71 (s, 1H), 7.64 (s, 1H), 4.12 (t, *J* = 7.1 Hz, 2H), 3.82 (s, 2H), 1.81 – 1.67 (m, 2H), 1.33 – 1.08 (m, 9H), 0.82 (d, *J* = 6.9 Hz, 3H). <sup>13</sup>C NMR (101 MHz, DMSO) δ = 136.40, 123.51, 122.16, 119.44 (q, *J* = 322.1 Hz), 48.73, 35.63, 31.07, 29.29, 28.38, 28.24, 25.40, 21.96, 13.78. <sup>19</sup>F NMR (376 MHz, DMSO) δ = -78.92.

## 2. Data

### NMR Spectra

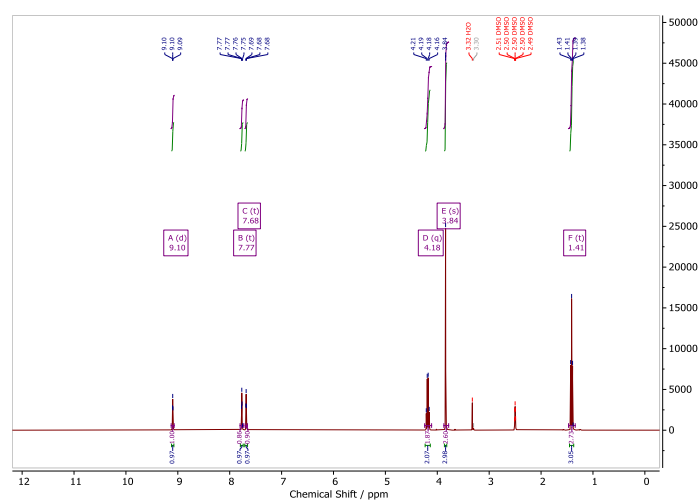

**Figure S1** <sup>1</sup>H NMR of [C<sub>2</sub>C<sub>1</sub>Im][NTf<sub>2</sub>] in DMSO-*d*<sub>6</sub>.

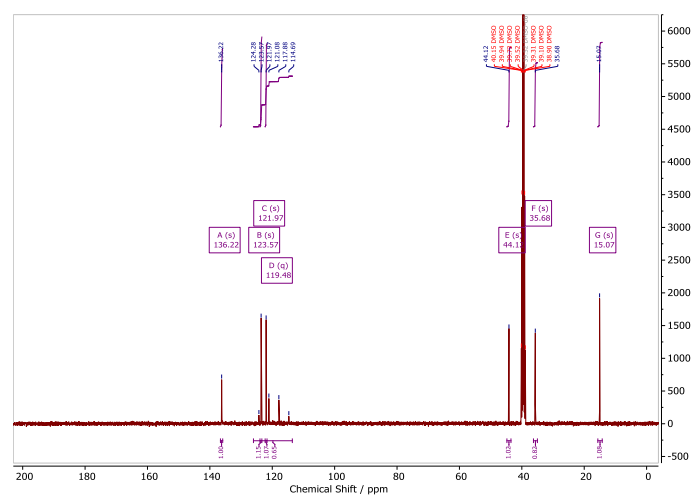

**Figure S2** <sup>13</sup>C NMR of [C<sub>2</sub>C<sub>1</sub>Im][NTf<sub>2</sub>] in DMSO-*d*<sub>6</sub>.

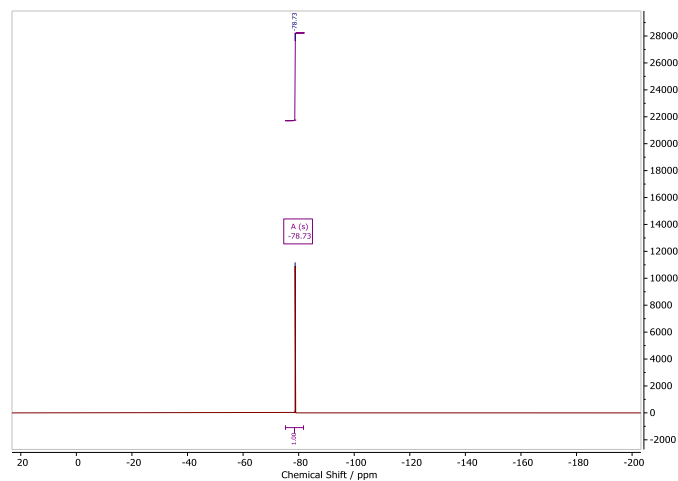

Figure S3  $^{19}\text{F}$  NMR of  $[\text{C}_2\text{C}_1\text{Im}][\text{NTf}_2]$  in  $\text{DMSO-}d_6$ .

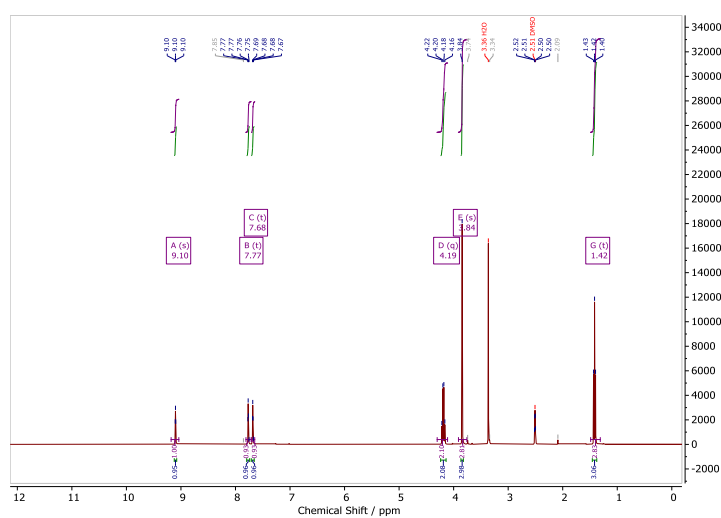

Figure S4  $^1\text{H}$  NMR of  $[\text{C}_2\text{C}_1\text{Im}][\text{NTf}_2]_{0.33}\text{Zn}[\text{NTf}_2]_2$  in  $\text{DMSO-}d_6$ .

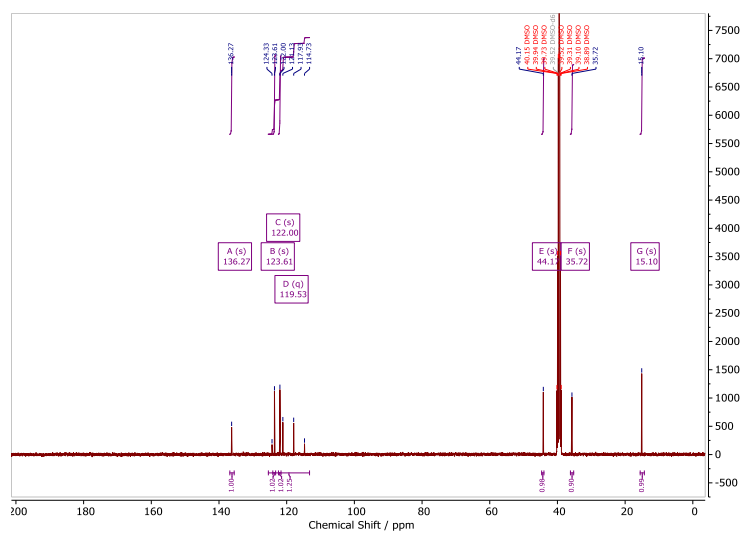

Figure S5  $^{13}\text{C}$  NMR of  $[\text{C}_2\text{C}_1\text{Im}][\text{NTf}_2]_{0.33}\text{Zn}[\text{NTf}_2]_2$  in  $\text{DMSO-}d_6$ .

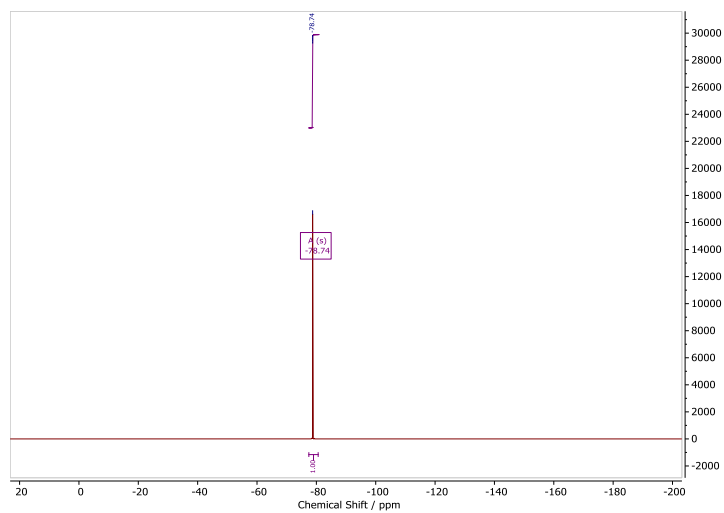

Figure S6  $^{19}\text{F}$  NMR of  $[\text{C}_2\text{C}_1\text{Im}][\text{NTf}_2]_{0.33}\text{Zn}[\text{NTf}_2]_2$  in  $\text{DMSO-}d_6$ .

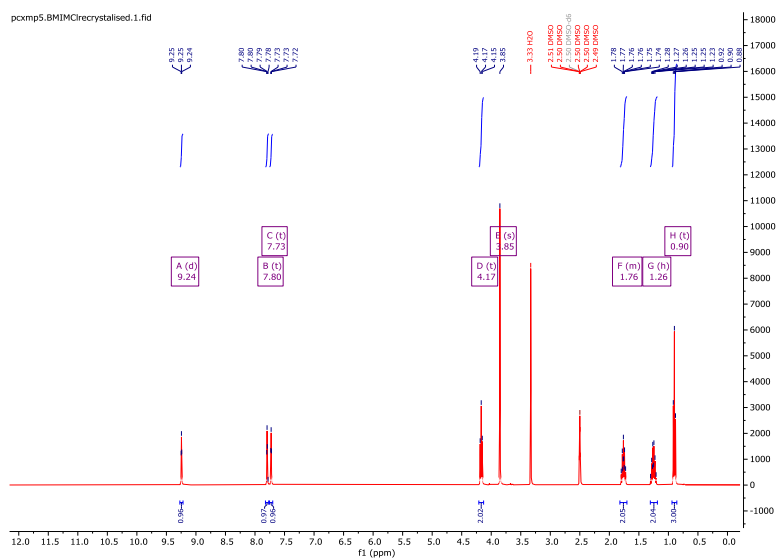

Figure S7  $^1\text{H}$  NMR of  $[\text{C}_4\text{C}_1\text{Im}]\text{Cl}$  in  $\text{DMSO-}d_6$ .



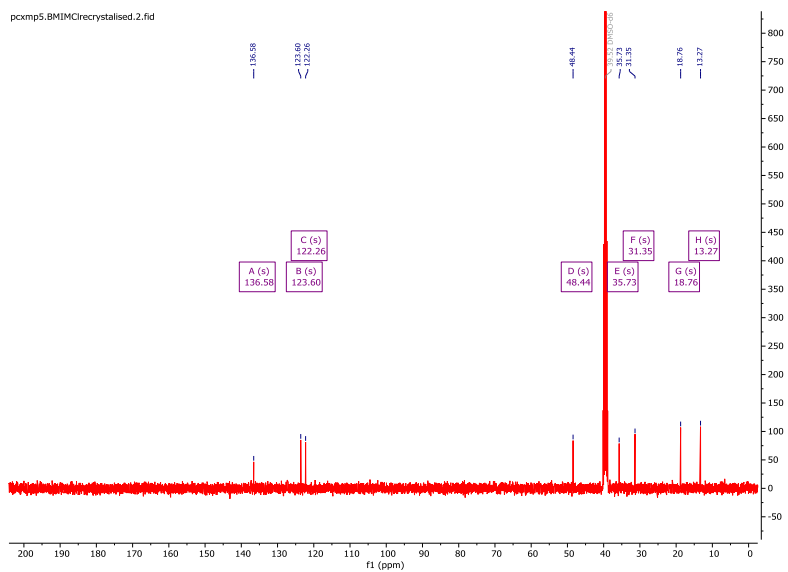

Figure S8  $^{13}\text{C}$  NMR of  $[\text{C}_4\text{C}_1\text{Im}]\text{Cl}$  in  $\text{DMSO-}d_6$ .

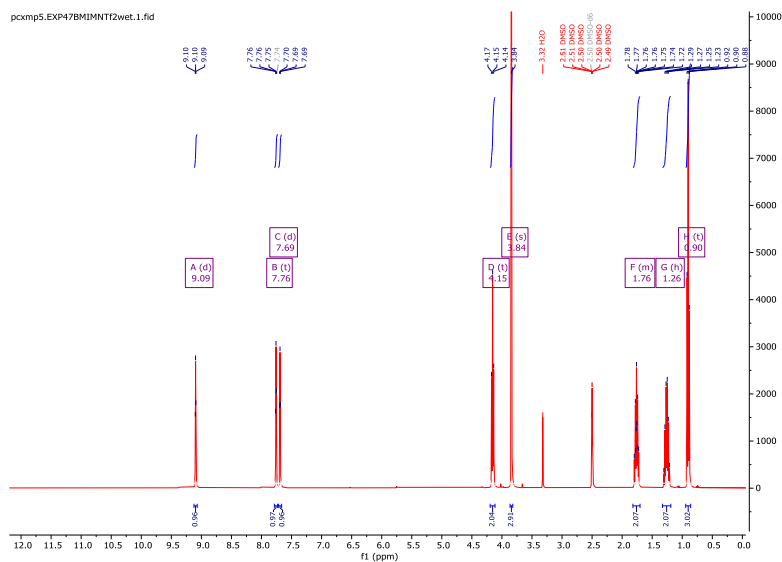

Figure S9  $^1\text{H}$  NMR of  $[\text{C}_4\text{C}_1\text{Im}][\text{NTf}_2]$  in  $\text{DMSO-}d_6$ .

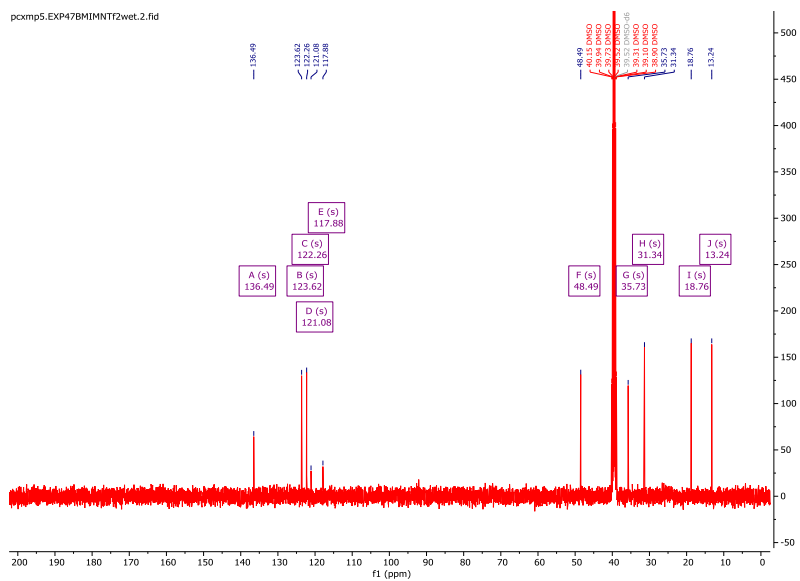

Figure S10  $^{13}\text{C}$  NMR of  $[\text{C}_4\text{C}_1\text{Im}][\text{NTf}_2]$  in  $\text{DMSO-}d_6$ .

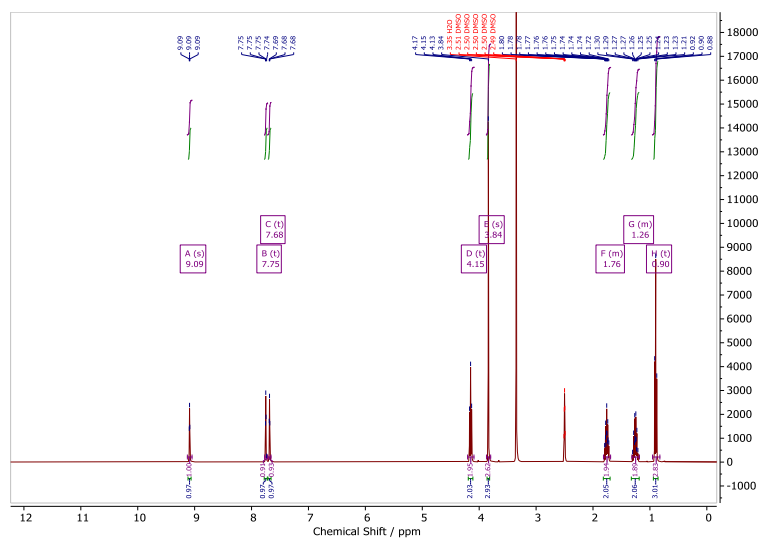

Figure S11  $^1\text{H}$  NMR of  $[\text{C}_4\text{C}_1\text{Im}][\text{NTf}_2]_{0.33}\text{Zn}[\text{NTf}_2]_2$  in  $\text{DMSO-}d_6$ .

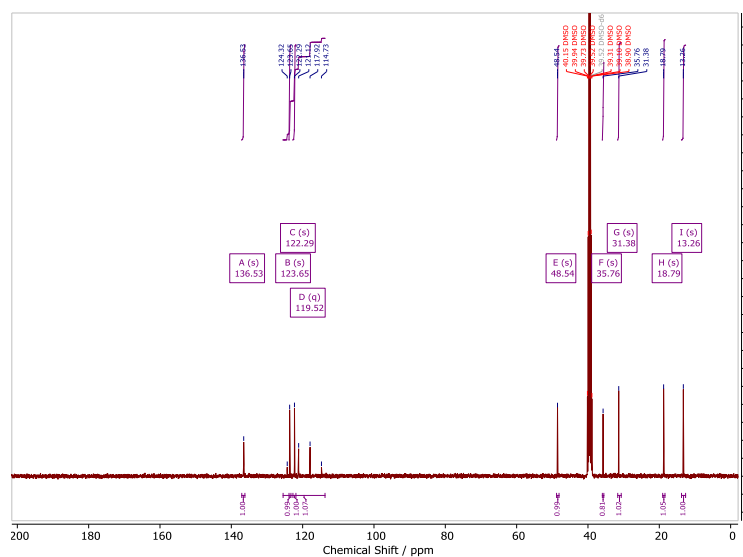

Figure S12  $^{13}\text{C}$  NMR of  $[\text{C}_4\text{C}_1\text{Im}][\text{NTf}_2]_{0.33}\text{Zn}[\text{NTf}_2]_2$  in  $\text{DMSO}-d_6$ .

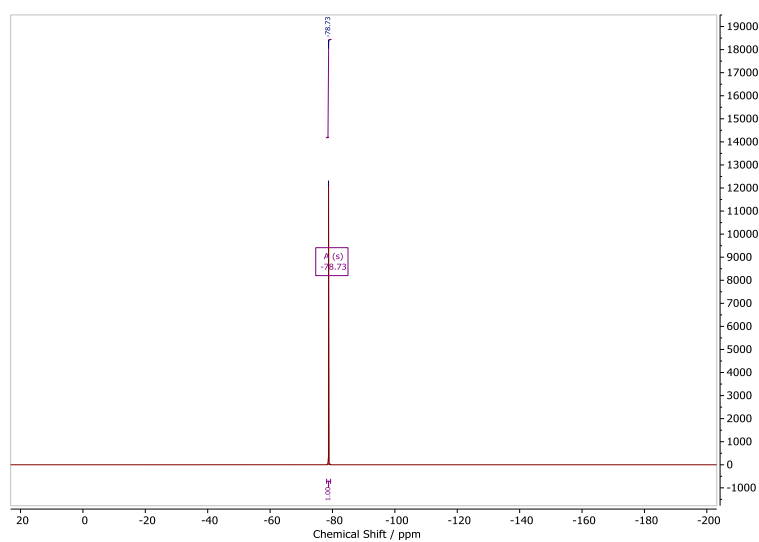

Figure S13  $^{19}\text{F}$  NMR of  $[\text{C}_4\text{C}_1\text{Im}][\text{NTf}_2]_{0.33}\text{Zn}[\text{NTf}_2]_2$  in  $\text{DMSO}-d_6$ .

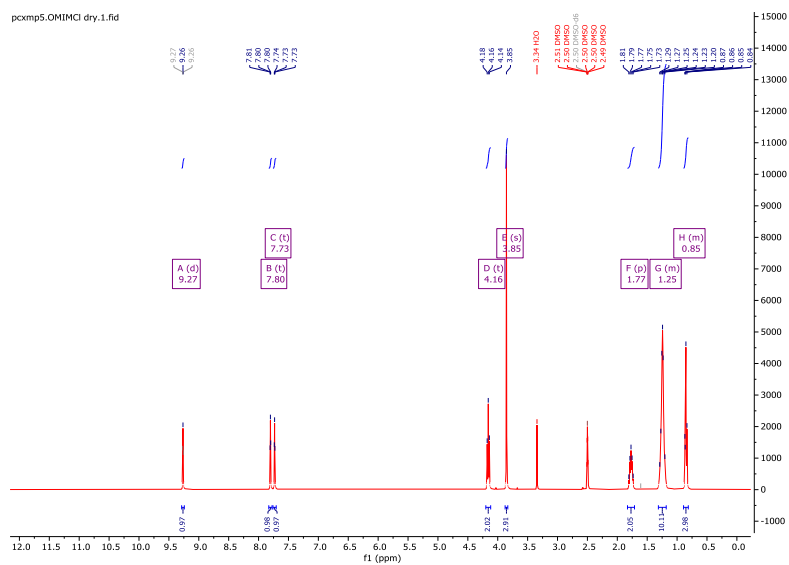

Figure S14  $^1\text{H}$  NMR of  $[\text{C}_8\text{C}_1\text{Im}]\text{Cl}$  in  $\text{DMSO}-d_6$ .

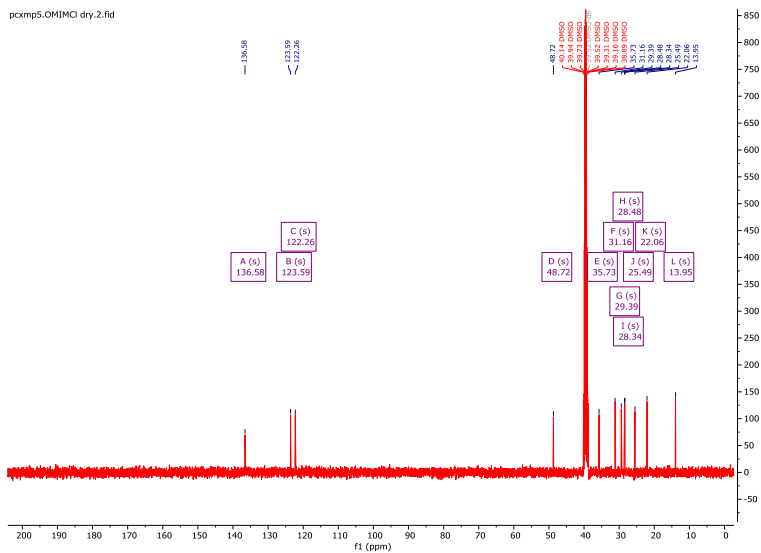

Figure S15  $^{13}\text{C}$  NMR of  $[\text{C}_8\text{C}_1\text{Im}]\text{Cl}$  in  $\text{DMSO-}d_6$ .

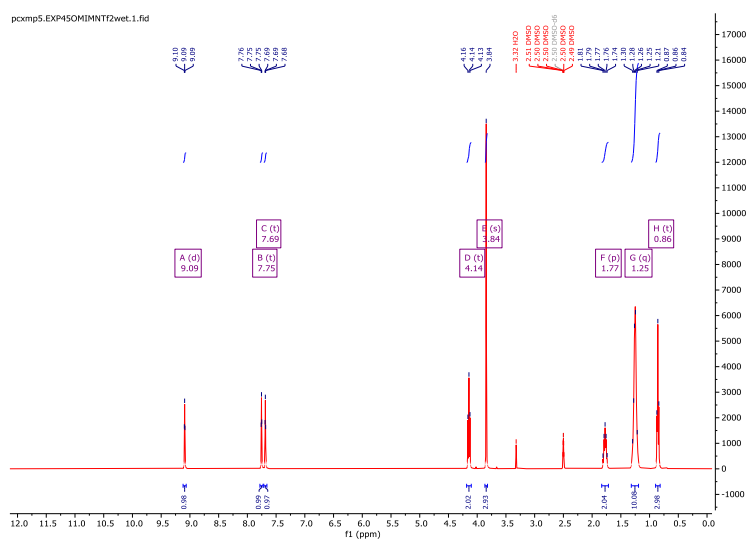

Figure S16  $^1\text{H}$  NMR of  $[\text{C}_8\text{C}_1\text{Im}][\text{NTf}_2]$  in  $\text{DMSO-}d_6$ .

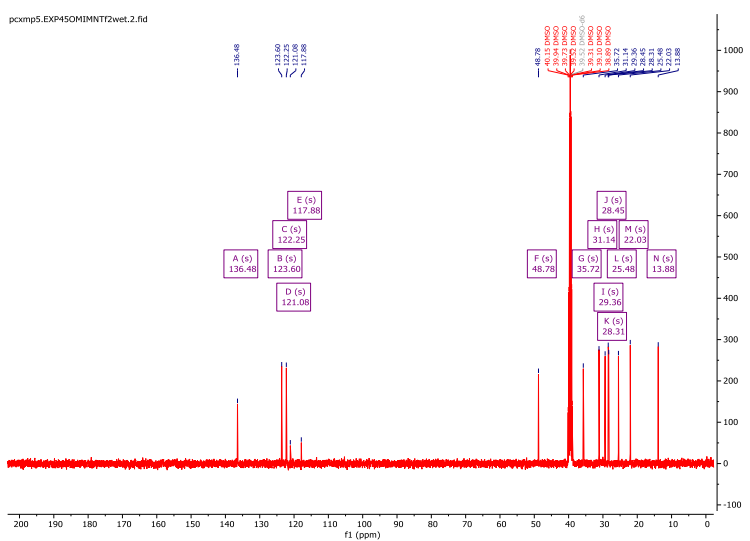

Figure S17  $^{13}\text{C}$  NMR of  $[\text{C}_8\text{C}_1\text{Im}][\text{NTf}_2]$  in  $\text{DMSO-}d_6$ .

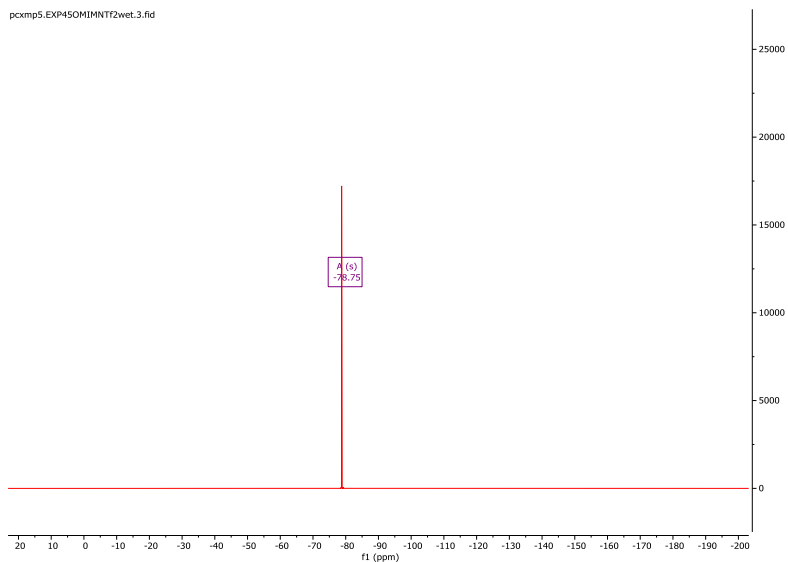

Figure S18  $^{19}\text{F}$  NMR of  $[\text{C}_8\text{C}_1\text{Im}][\text{NTf}_2]$  in  $\text{DMSO-}d_6$ .

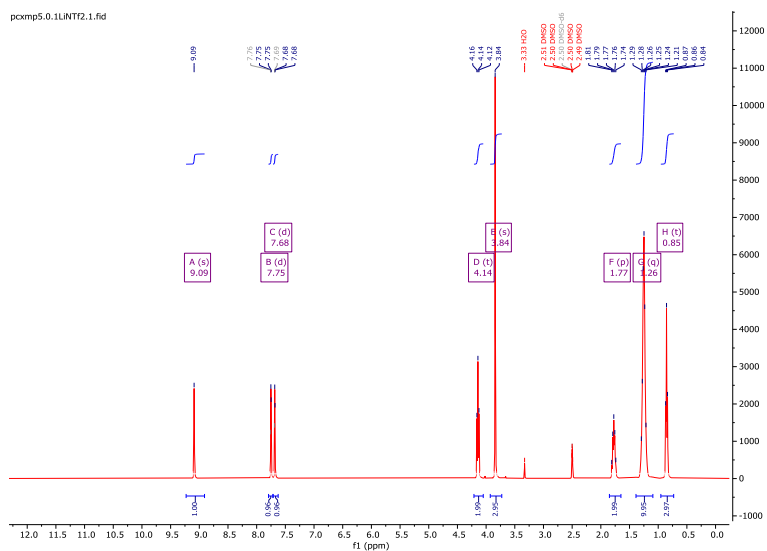

Figure S19  $^1\text{H}$  NMR of  $[\text{C}_8\text{C}_1\text{Im}][\text{NTf}_2]_{0.1}\text{Li}[\text{NTf}_2]$  in  $\text{DMSO-}d_6$ .

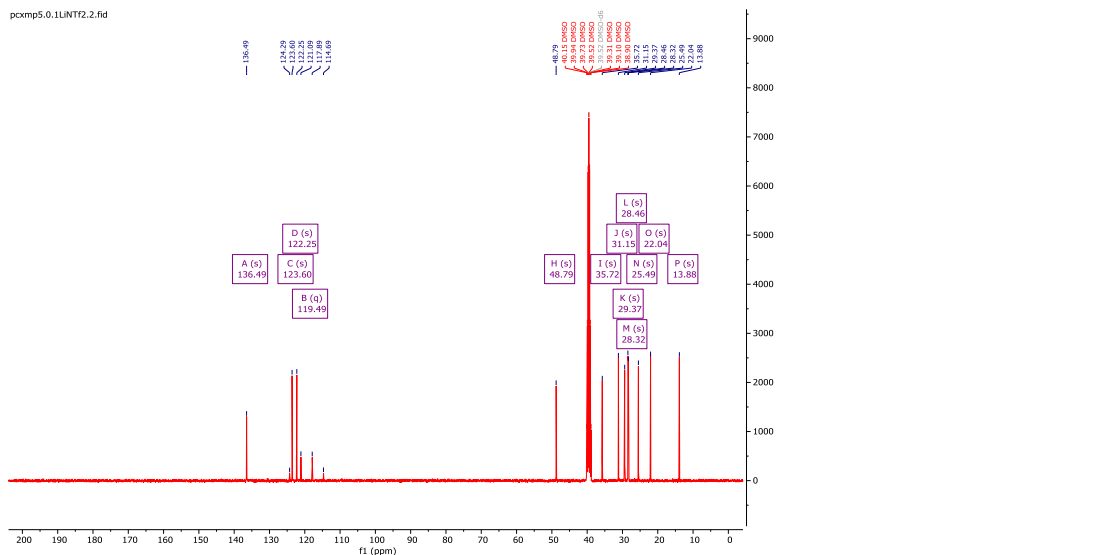

Figure S20  $^{13}\text{C}$  NMR of  $[\text{C}_8\text{C}_1\text{Im}][\text{NTf}_2]_{0.1}\text{Li}[\text{NTf}_2]$  in  $\text{DMSO-}d_6$ .

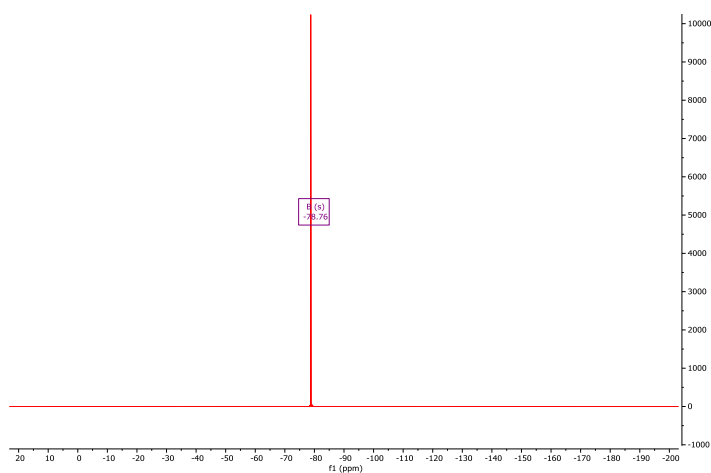

Figure S21  $^{19}\text{F}$  NMR of  $[\text{C}_8\text{C}_1\text{Im}][\text{NTf}_2]_{0.1}\text{Li}[\text{NTf}_2]$  in  $\text{DMSO-}d_6$ .

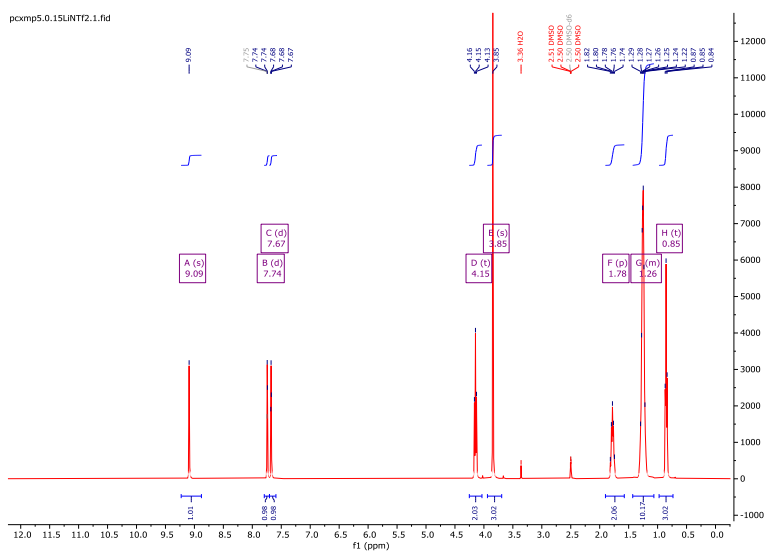

Figure S22  $^1\text{H}$  NMR of  $[\text{C}_8\text{C}_1\text{Im}][\text{NTf}_2]_{0.15}\text{Li}[\text{NTf}_2]$  in  $\text{DMSO-}d_6$ .

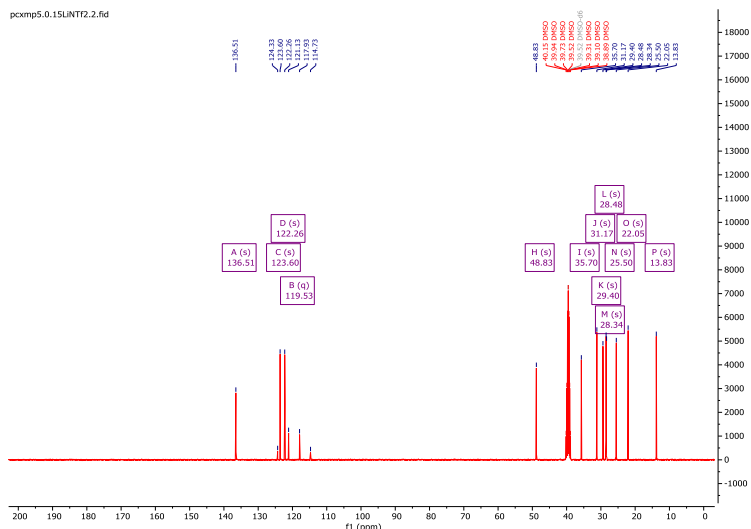

Figure S23  $^{13}\text{C}$  NMR of  $[\text{C}_8\text{C}_1\text{Im}][\text{NTf}_2]_{0.15}\text{Li}[\text{NTf}_2]$  in  $\text{DMSO-}d_6$ .

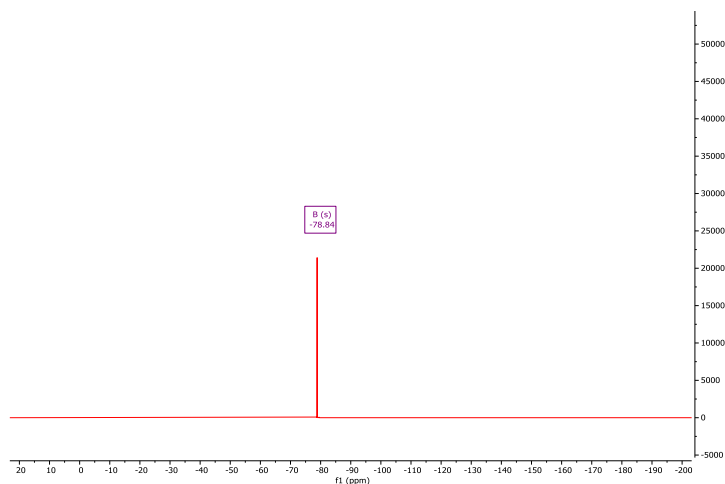

Figure S24  $^{13}\text{C}$  NMR of  $[\text{C}_8\text{C}_1\text{Im}][\text{NTf}_2]_{0.15}\text{Li}[\text{NTf}_2]$  in  $\text{DMSO-}d_6$ .

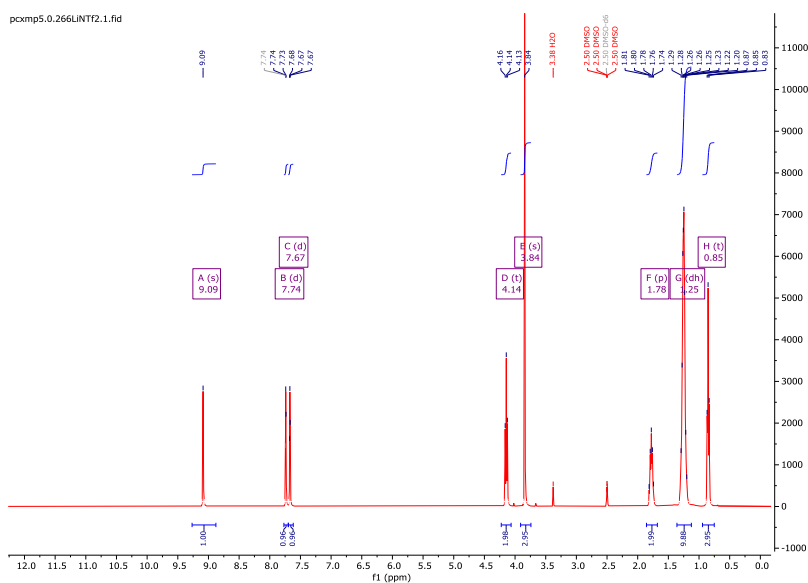

Figure S25  $^1\text{H}$  NMR of  $[\text{C}_8\text{C}_1\text{Im}][\text{NTf}_2]_{0.27}\text{Li}[\text{NTf}_2]$  in  $\text{DMSO-}d_6$ .

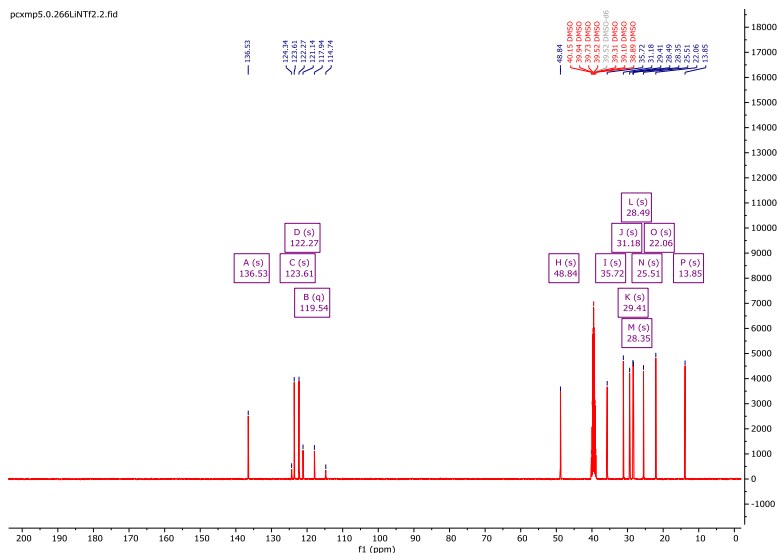

Figure S26  $^{13}\text{C}$  NMR of  $[\text{C}_8\text{C}_1\text{Im}][\text{NTf}_2]_{0.27}\text{Li}[\text{NTf}_2]$  in  $\text{DMSO-}d_6$ .

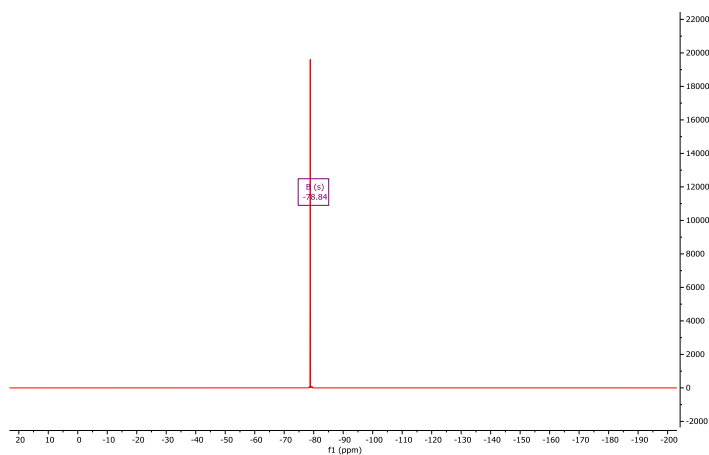

Figure S27  $^{19}\text{F}$  NMR of  $[\text{C}_8\text{C}_1\text{Im}][\text{NTf}_2]_{0.27}\text{Li}[\text{NTf}_2]$  in  $\text{DMSO-}d_6$ .

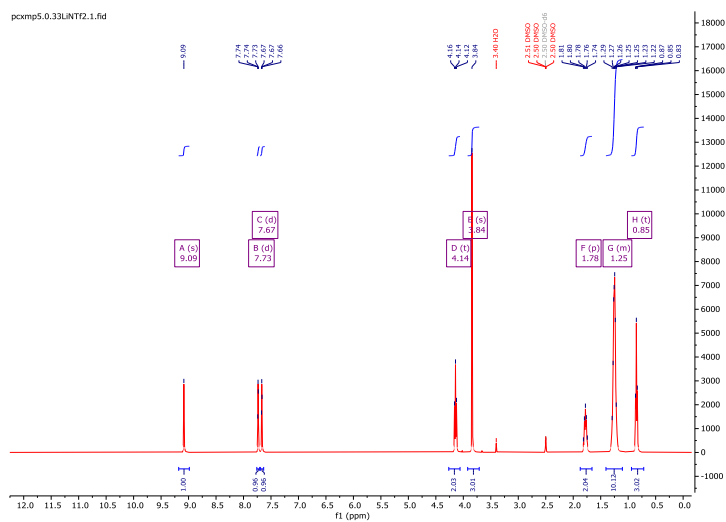

Figure S28  $^1\text{H}$  NMR of  $[\text{C}_8\text{C}_1\text{Im}][\text{NTf}_2]_{0.33}\text{Li}[\text{NTf}_2]$  in  $\text{DMSO-}d_6$ .



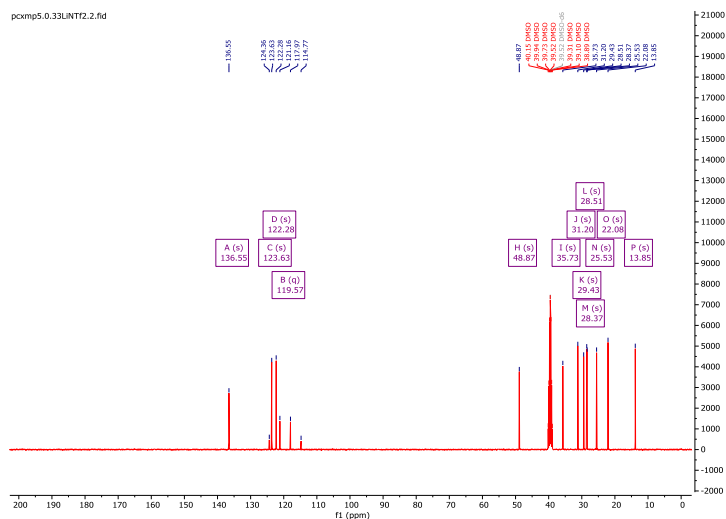

Figure S29  $^{13}\text{C}$  NMR of  $[\text{C}_8\text{C}_1\text{Im}][\text{NTf}_2]_{0.33}\text{Li}[\text{NTf}_2]$  in  $\text{DMSO-}d_6$ .

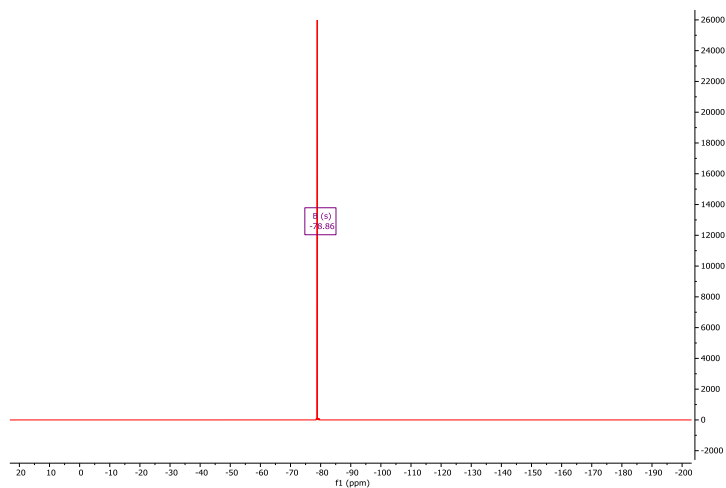

Figure S30  $^{19}\text{F}$  NMR of  $[\text{C}_8\text{C}_1\text{Im}][\text{NTf}_2]_{0.33}\text{Li}[\text{NTf}_2]$  in  $\text{DMSO-}d_6$ .

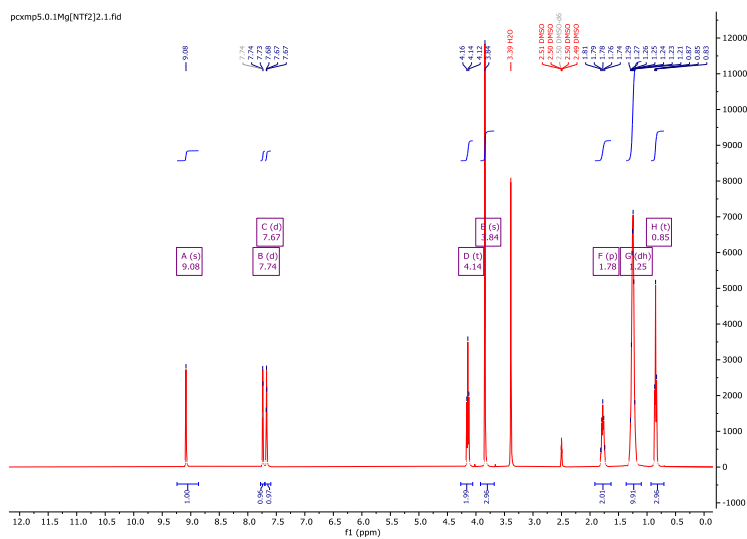

Figure S31  $^1\text{H}$  NMR of  $[\text{C}_8\text{C}_1\text{Im}][\text{NTf}_2]_{0.1}\text{Mg}[\text{NTf}_2]_2$  in  $\text{DMSO-}d_6$ .

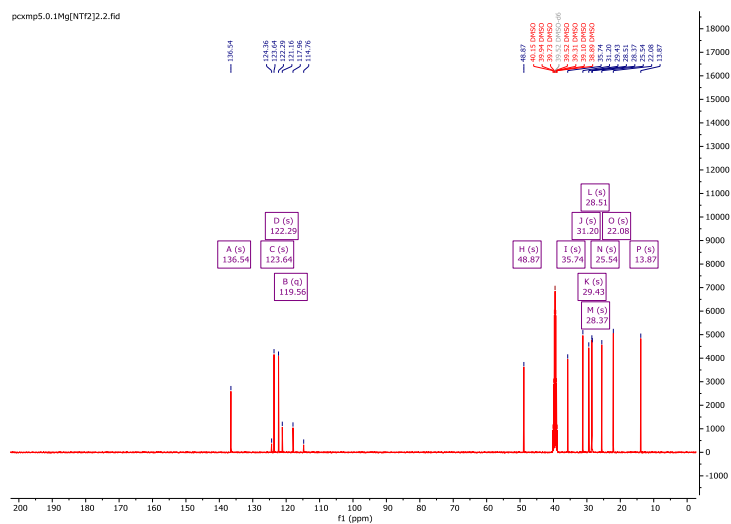

Figure S32  $^{13}\text{C}$  NMR of  $[\text{C}_8\text{C}_1\text{Im}][\text{NTf}_2]_{0.1}\text{Mg}[\text{NTf}_2]_2$  in  $\text{DMSO-}d_6$ .

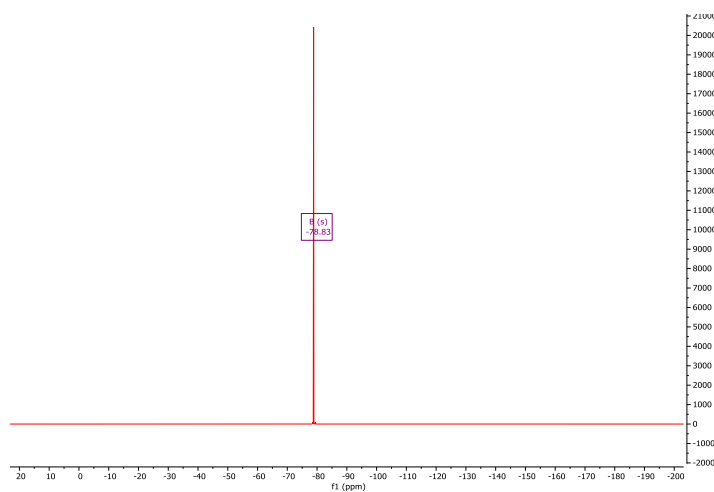

Figure S33  $^{19}\text{F}$  NMR of  $[\text{C}_8\text{C}_1\text{Im}][\text{NTf}_2]_{0.1}\text{Mg}[\text{NTf}_2]_2$  in  $\text{DMSO-}d_6$ .

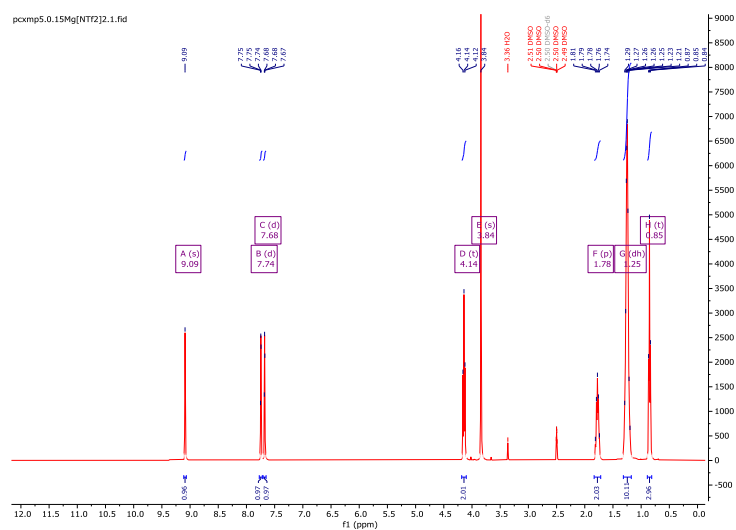

Figure S34  $^1\text{H}$  NMR of  $[\text{C}_8\text{C}_1\text{Im}][\text{NTf}_2]_{0.15}\text{Mg}[\text{NTf}_2]_2$  in  $\text{DMSO-}d_6$ .

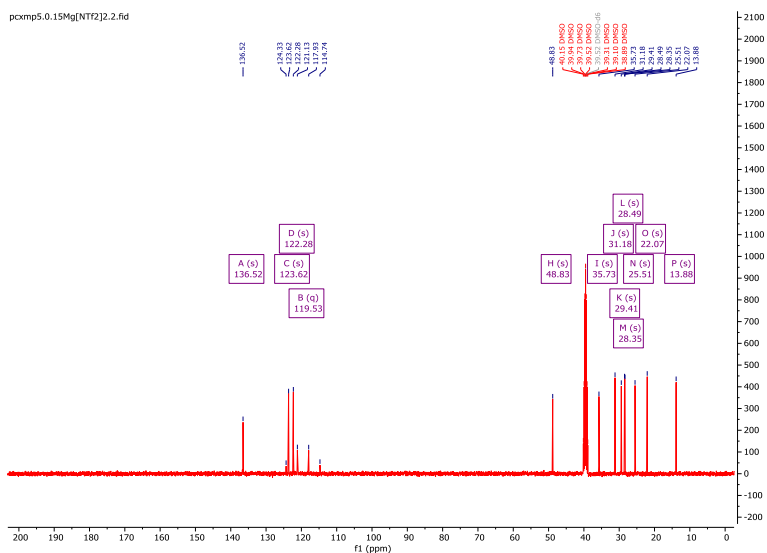

Figure S35  $^{13}\text{C}$  NMR of  $[\text{C}_8\text{C}_1\text{Im}][\text{NTf}_2]_{0.15}\text{Mg}[\text{NTf}_2]_2$  in  $\text{DMSO-}d_6$ .

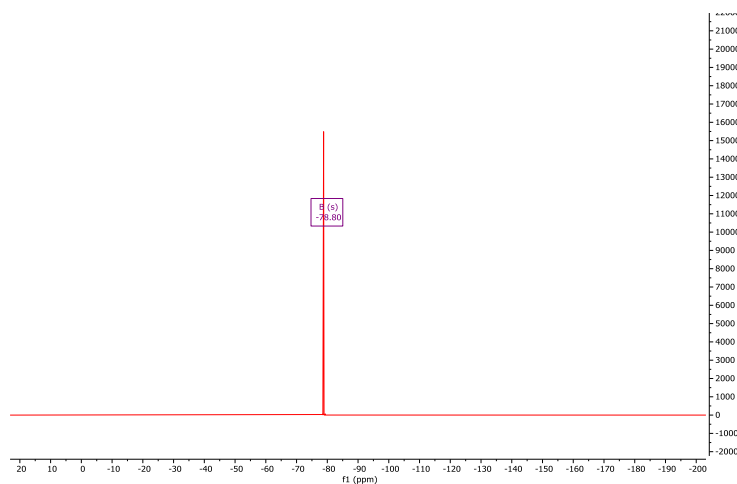

Figure S36  $^{19}\text{F}$  NMR of  $[\text{C}_8\text{C}_1\text{Im}][\text{NTf}_2]_{0.15}\text{Mg}[\text{NTf}_2]_2$  in  $\text{DMSO-}d_6$ .

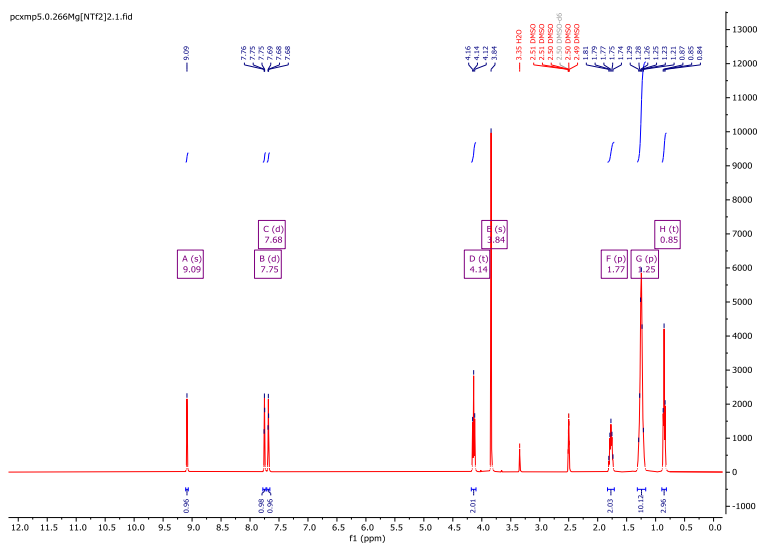

Figure S37  $^1\text{H}$  NMR of  $[\text{C}_8\text{C}_1\text{Im}][\text{NTf}_2]_{0.27}\text{Mg}[\text{NTf}_2]_2$  in  $\text{DMSO-}d_6$ .

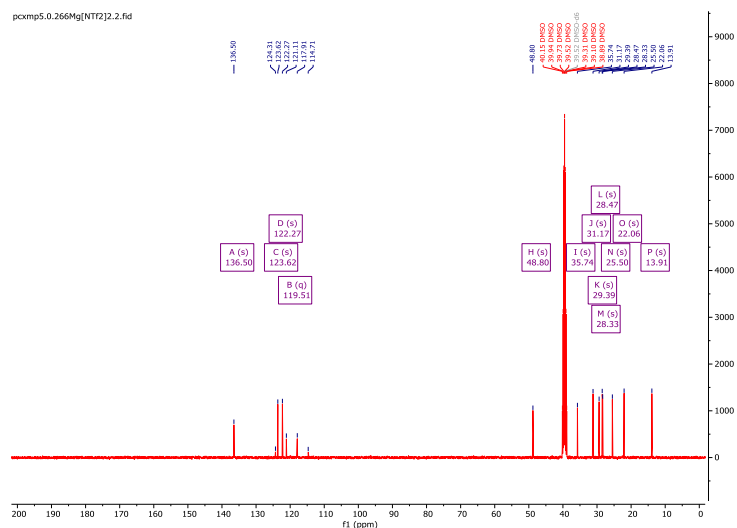

Figure S38  $^{13}\text{C}$  NMR of  $[\text{C}_8\text{C}_1\text{Im}][\text{NTf}_2]_{0.27}\text{Mg}[\text{NTf}_2]_2$  in  $\text{DMSO-}d_6$ .

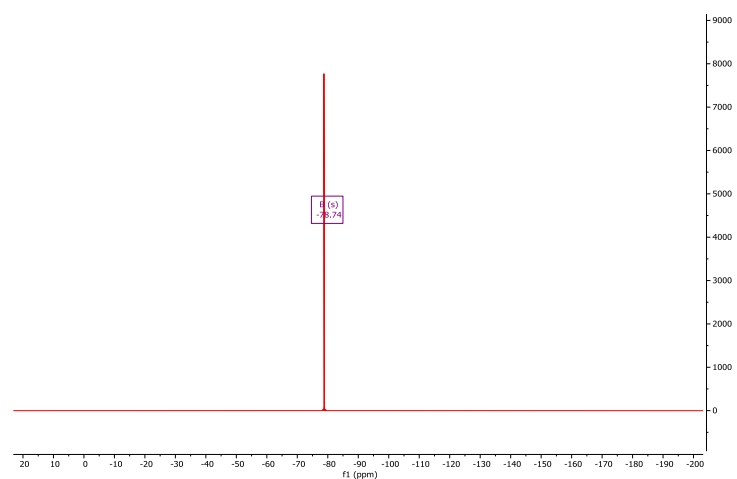

Figure S39  $^{19}\text{F}$  NMR of  $[\text{C}_8\text{C}_1\text{Im}][\text{NTf}_2]_{0.27}\text{Mg}[\text{NTf}_2]_2$  in  $\text{DMSO-}d_6$ .

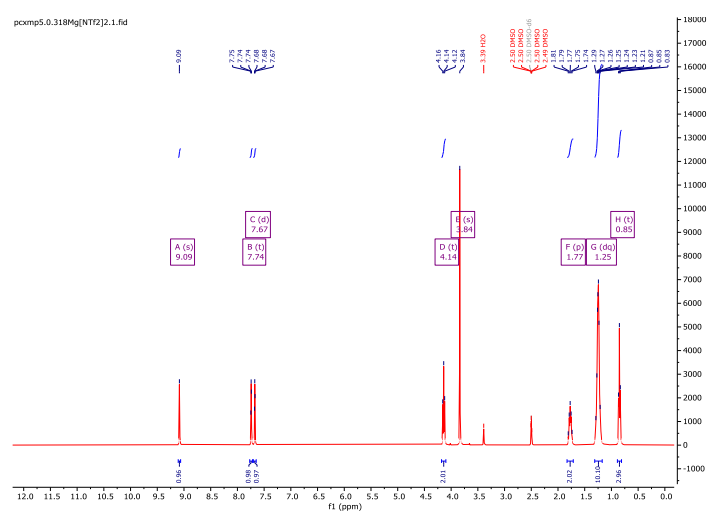

Figure S40  $^1\text{H}$  NMR of  $[\text{C}_8\text{C}_1\text{Im}][\text{NTf}_2]_{0.32}\text{Mg}[\text{NTf}_2]_2$  in  $\text{DMSO-}d_6$ .

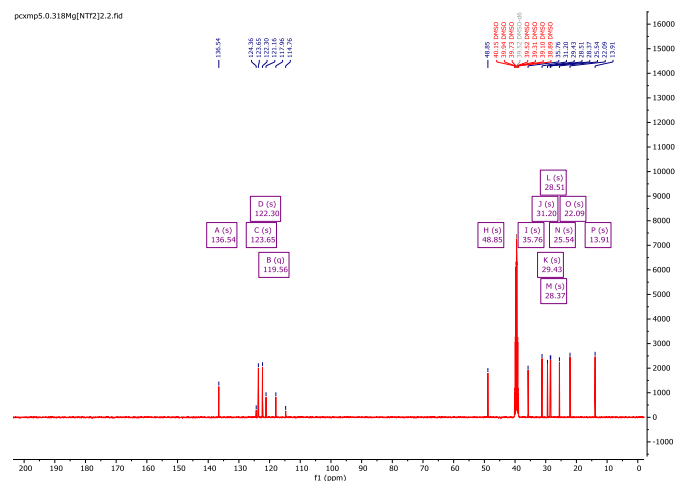

Figure S41  $^{13}\text{C}$  NMR of  $[\text{C}_8\text{C}_1\text{Im}][\text{NTf}_2]_{0.32}\text{Mg}[\text{NTf}_2]_2$  in  $\text{DMSO-}d_6$ .

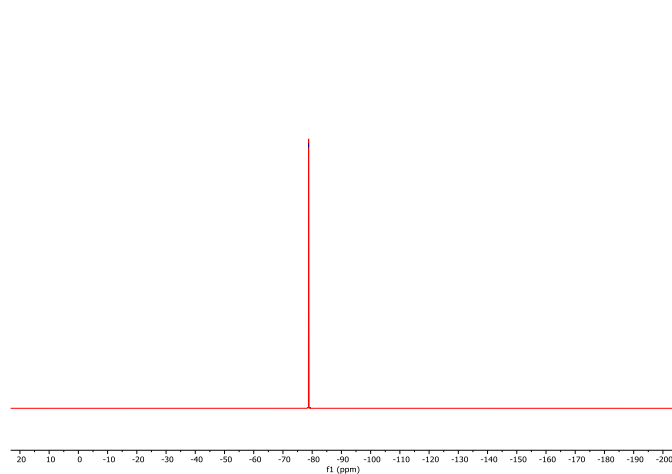

Figure S42  $^{19}\text{F}$  NMR of  $[\text{C}_8\text{C}_1\text{Im}][\text{NTf}_2]_{0.32}\text{Mg}[\text{NTf}_2]_2$  in  $\text{DMSO-}d_6$ .

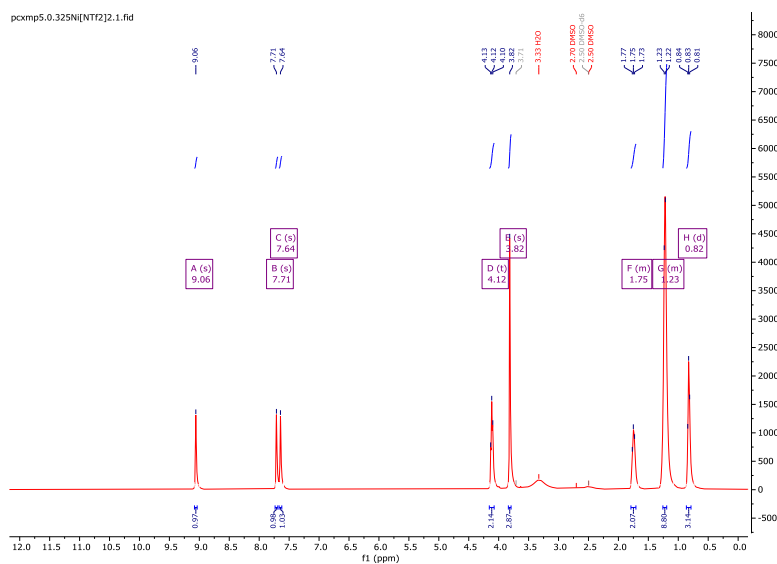

Figure S43  $^1\text{H}$  NMR of  $[\text{C}_8\text{C}_1\text{Im}][\text{NTf}_2]_{0.33}\text{Ni}[\text{NTf}_2]_2$  in  $\text{DMSO-}d_6$ .

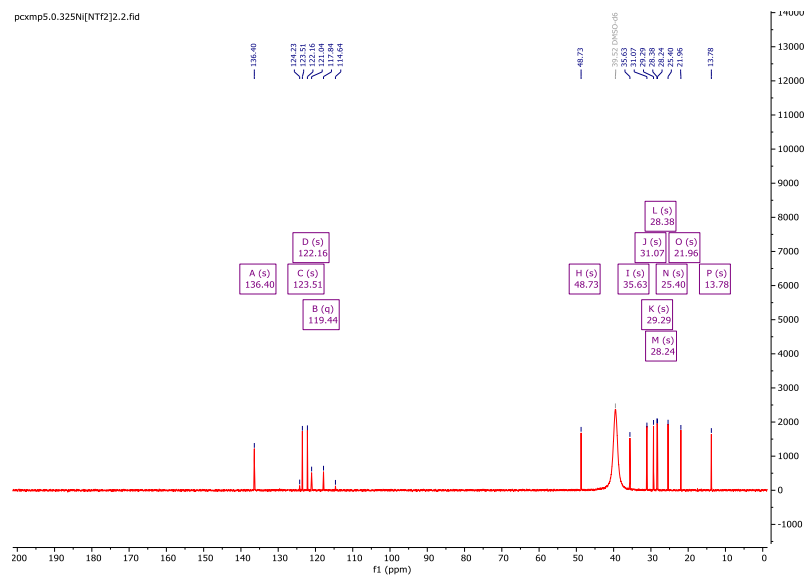

Figure S44  $^{13}\text{C}$  NMR of  $[\text{C}_8\text{C}_1\text{Im}][\text{NTf}_2]_{0.33}\text{Ni}[\text{NTf}_2]_2$  in  $\text{DMSO-}d_6$ .

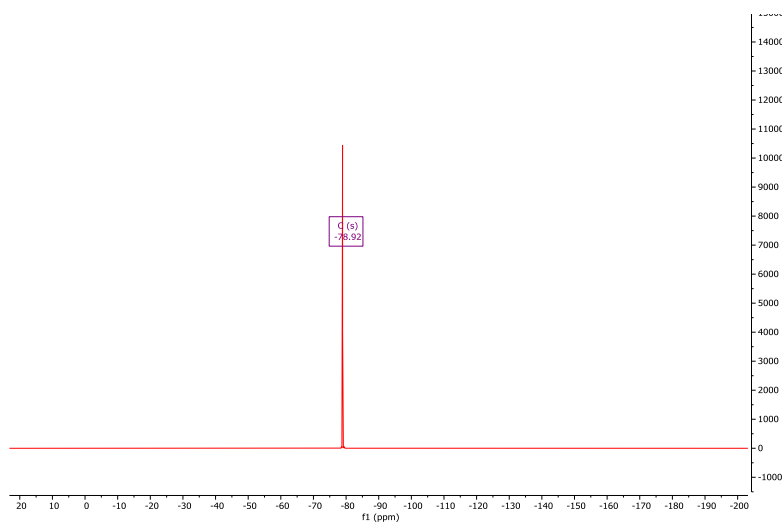

Figure S45  $^{19}\text{F}$  NMR of  $[\text{C}_8\text{C}_1\text{Im}][\text{NTf}_2]_{0.33}\text{Ni}[\text{NTf}_2]_2$  in  $\text{DMSO-}d_6$ .

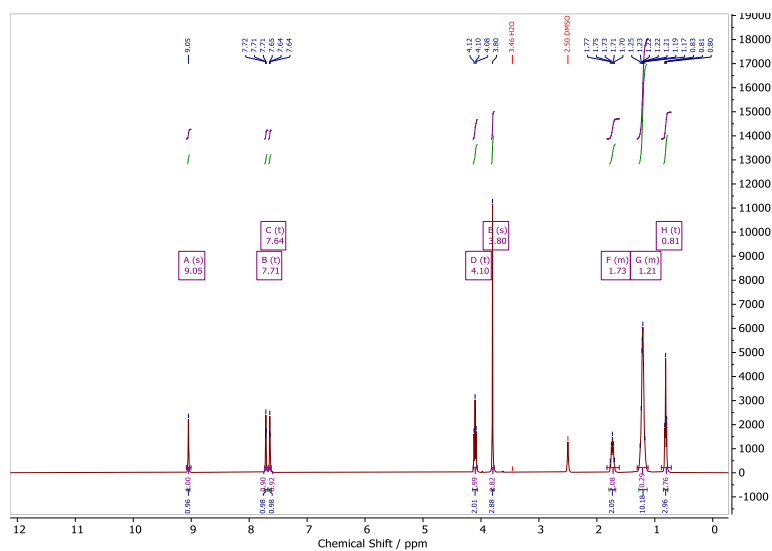

Figure S46  $^1\text{H}$  NMR of  $[\text{C}_8\text{C}_1\text{Im}][\text{NTf}_2]_{0.1}\text{Co}[\text{NTf}_2]_2$  in  $\text{DMSO-}d_6$ .

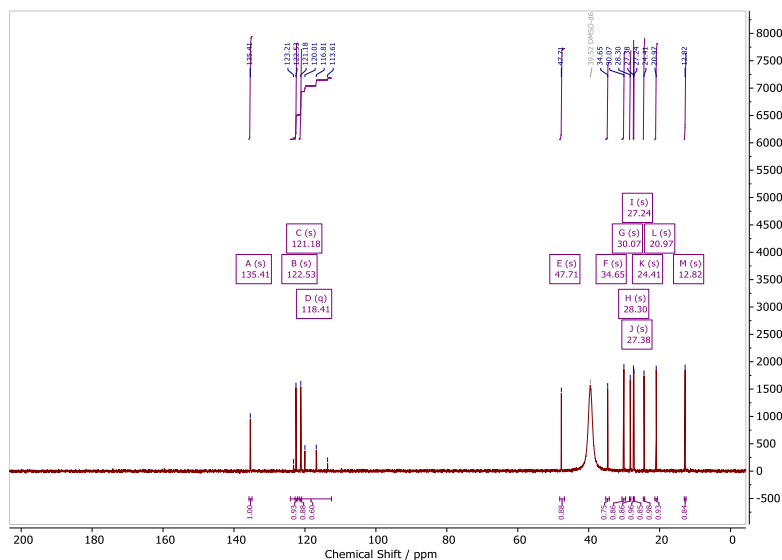

Figure S47  $^{13}\text{C}$  NMR of  $[\text{C}_8\text{C}_1\text{Im}][\text{NTf}_2]_{0.1}\text{Co}[\text{NTf}_2]_2$  in  $\text{DMSO-}d_6$ .

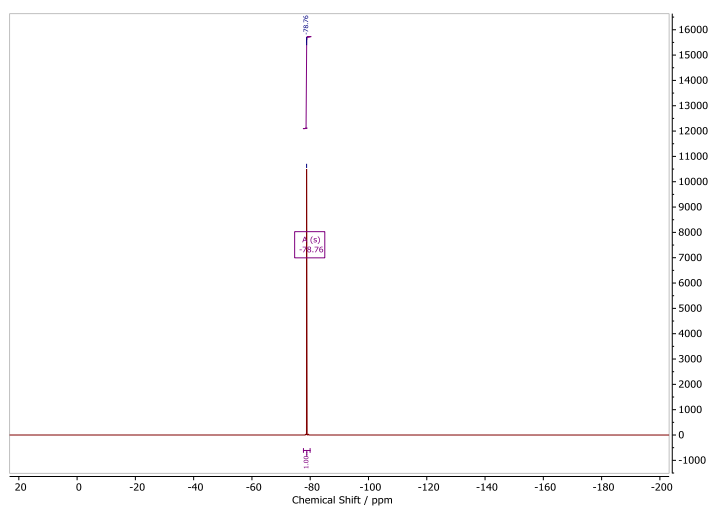

Figure S48  $^{19}\text{F}$  NMR of  $[\text{C}_8\text{C}_1\text{Im}][\text{NTf}_2]_{0.1}\text{Co}[\text{NTf}_2]_2$  in  $\text{DMSO-}d_6$ .

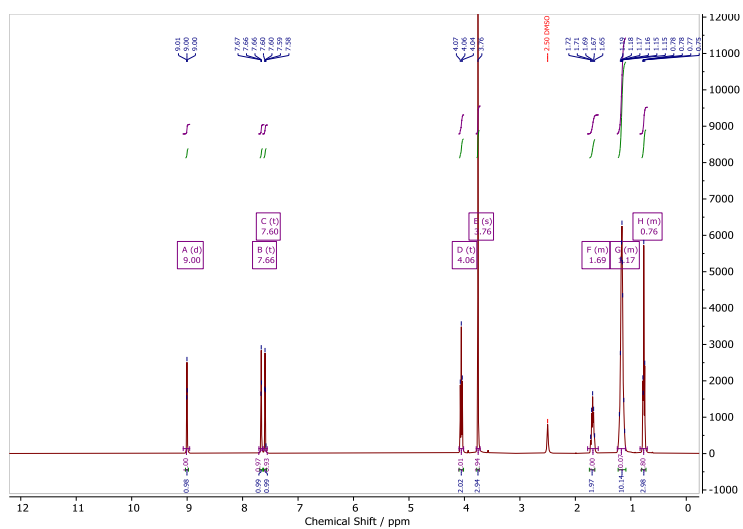

Figure S49  $^1\text{H}$  NMR of  $[\text{C}_8\text{C}_1\text{Im}][\text{NTf}_2]_{0.15}\text{Co}[\text{NTf}_2]_2$  in  $\text{DMSO-}d_6$ .

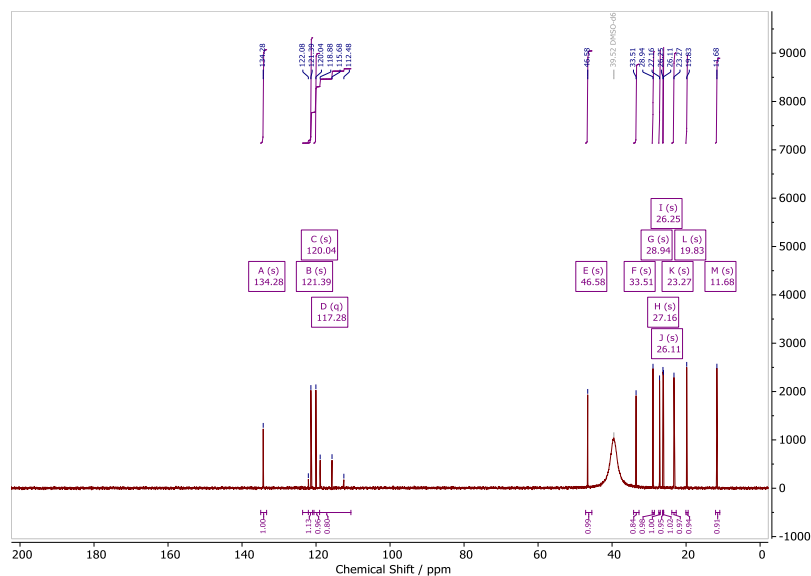

Figure S50  $^{13}\text{C}$  NMR of  $[\text{C}_8\text{C}_1\text{Im}][\text{NTf}_2]_{0.15}\text{Co}[\text{NTf}_2]_2$  in  $\text{DMSO-}d_6$ .

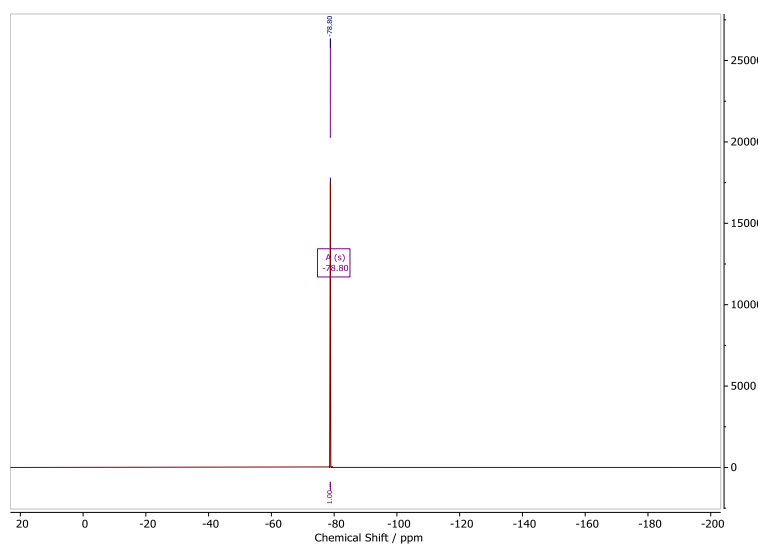

Figure S51  $^{19}\text{F}$  NMR of  $[\text{C}_8\text{C}_1\text{Im}][\text{NTf}_2]_{0.15}\text{Co}[\text{NTf}_2]_2$  in  $\text{DMSO-}d_6$ .

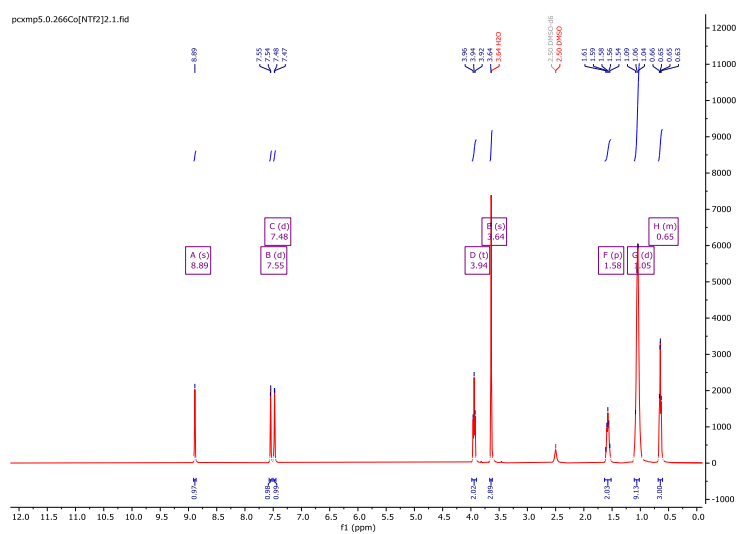

Figure S52  $^1\text{H}$  NMR of  $[\text{C}_8\text{C}_1\text{Im}][\text{NTf}_2]_{0.27}\text{Co}[\text{NTf}_2]_2$  in  $\text{DMSO-}d_6$ .



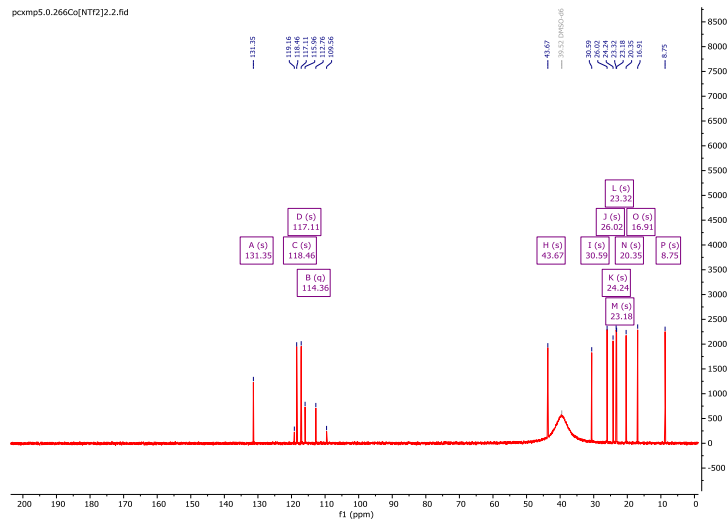

Figure S53  $^{13}\text{C}$  NMR of  $[\text{C}_8\text{C}_1\text{Im}][\text{NTf}_2]_{0.27}\text{Co}[\text{NTf}_2]_2$  in  $\text{DMSO-}d_6$ .

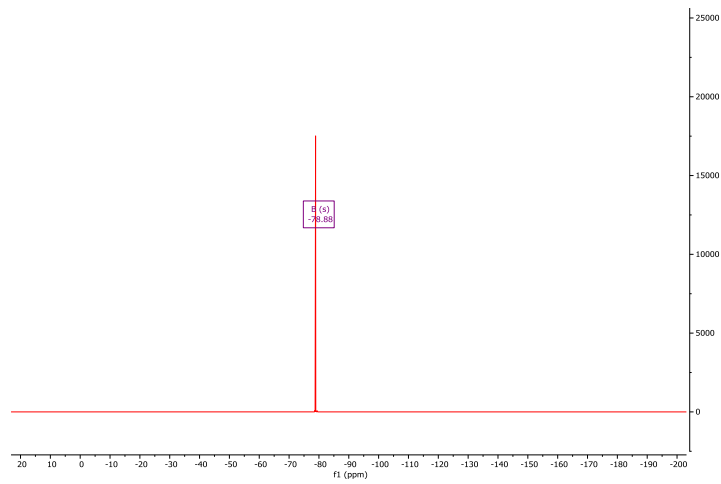

Figure S54  $^{19}\text{F}$  NMR of  $[\text{C}_8\text{C}_1\text{Im}][\text{NTf}_2]_{0.27}\text{Co}[\text{NTf}_2]_2$  in  $\text{DMSO-}d_6$ .

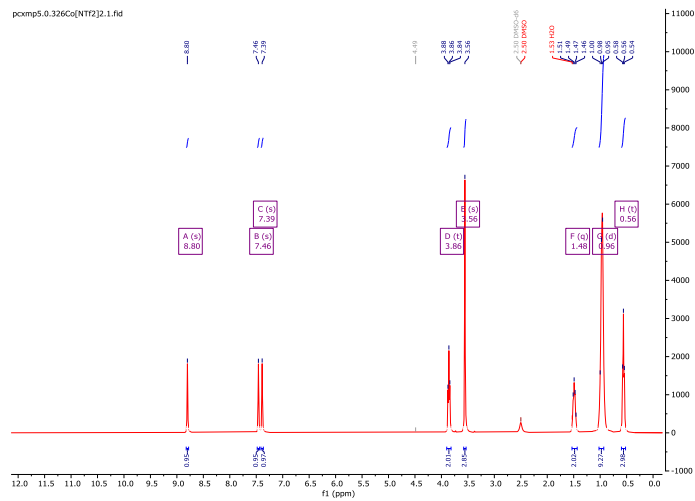

Figure S55  $^1\text{H}$  NMR of  $[\text{C}_8\text{C}_1\text{Im}][\text{NTf}_2]_{0.33}\text{Co}[\text{NTf}_2]_2$  in  $\text{DMSO-}d_6$ .

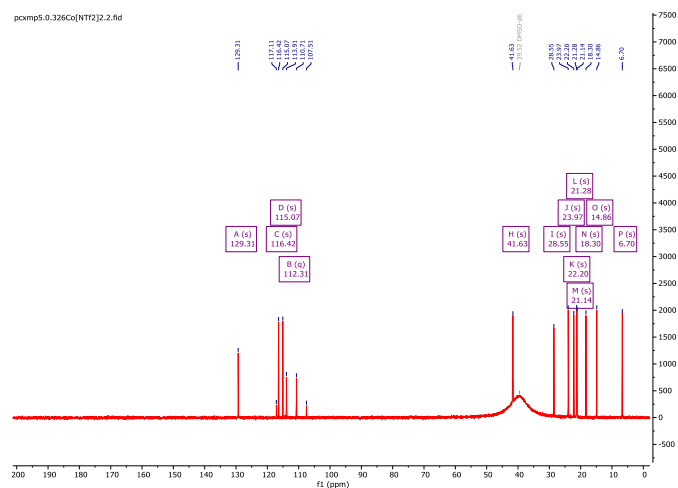

Figure S56  $^{13}\text{C}$  NMR of  $[\text{C}_8\text{C}_1\text{Im}][\text{NTf}_2]_{0.33}\text{Co}[\text{NTf}_2]_2$  in  $\text{DMSO-}d_6$ .

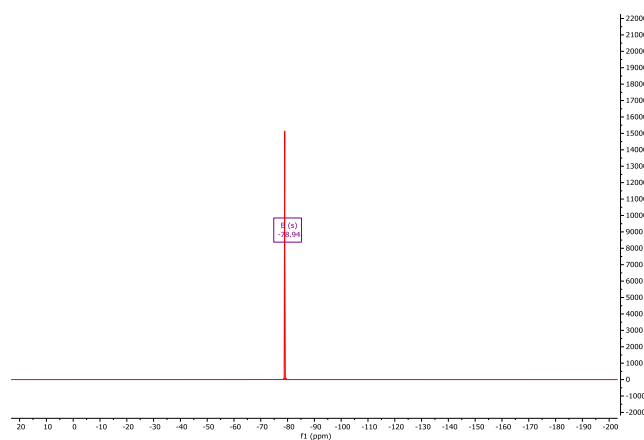

Figure S57  $^{19}\text{F}$  NMR of  $[\text{C}_8\text{C}_1\text{Im}][\text{NTf}_2]_{0.33}\text{Co}[\text{NTf}_2]_2$  in  $\text{DMSO-}d_6$ .

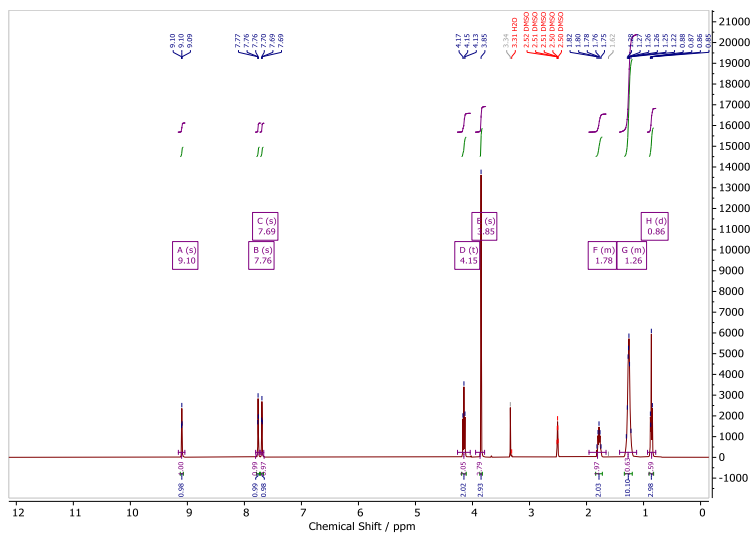

Figure S58  $^1\text{H}$  NMR of  $[\text{C}_8\text{C}_1\text{Im}][\text{NTf}_2]_{0.1}\text{Zn}[\text{NTf}_2]_2$  in  $\text{DMSO-}d_6$ .

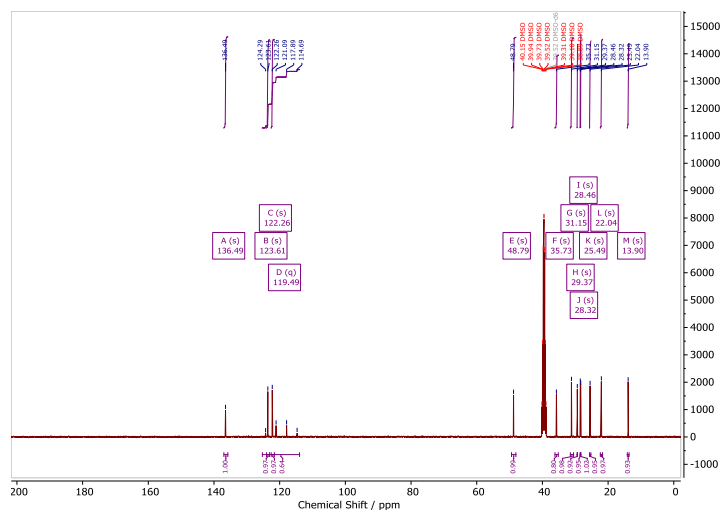

Figure S59  $^{13}\text{C}$  NMR of  $[\text{C}_8\text{C}_1\text{Im}][\text{NTf}_2]_{0.1}\text{Zn}[\text{NTf}_2]_2$  in  $\text{DMSO-}d_6$ .

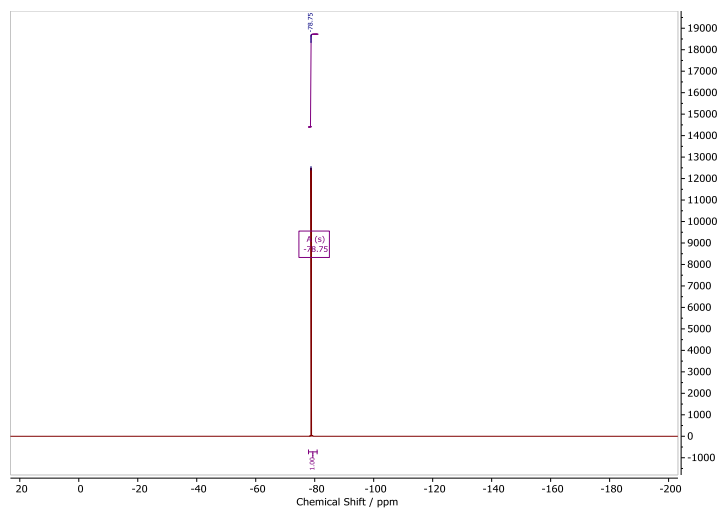

Figure S60  $^{19}\text{F}$  NMR of  $[\text{C}_8\text{C}_1\text{Im}][\text{NTf}_2]_{0.1}\text{Zn}[\text{NTf}_2]_2$  in  $\text{DMSO-}d_6$ .

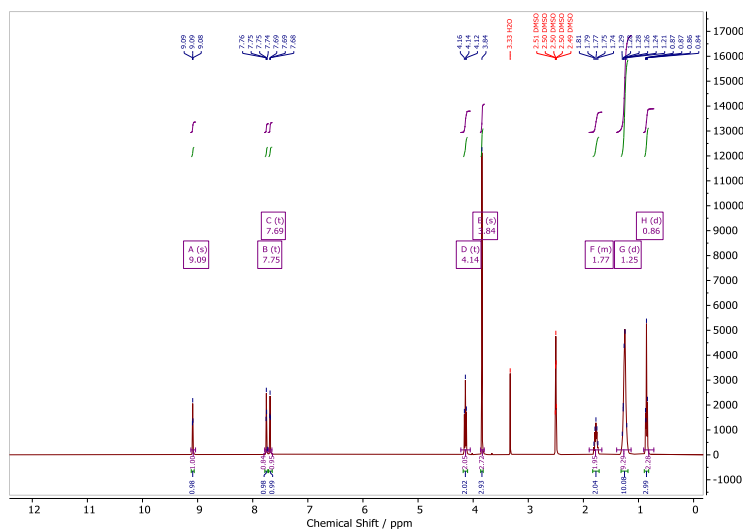

Figure S61  $^1\text{H}$  NMR of  $[\text{C}_8\text{C}_1\text{Im}][\text{NTf}_2]_{0.15}\text{Zn}[\text{NTf}_2]_2$  in  $\text{DMSO-}d_6$ .

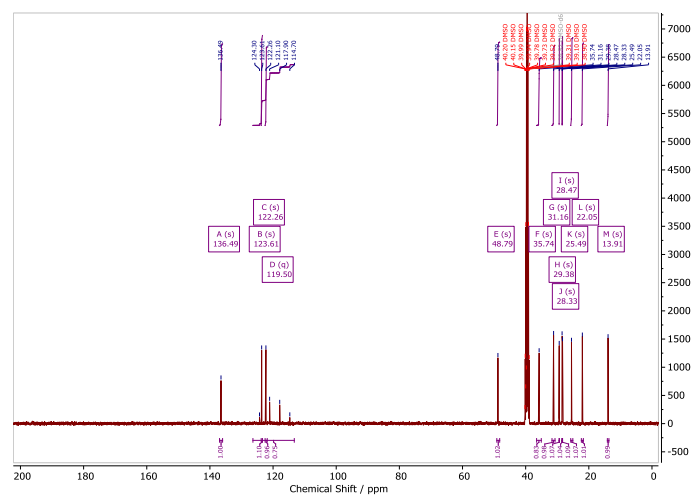

Figure S62  $^{13}\text{C}$  NMR of  $[\text{C}_8\text{C}_1\text{Im}][\text{NTf}_2]_{0.15}\text{Zn}[\text{NTf}_2]_2$  in  $\text{DMSO-}d_6$ .

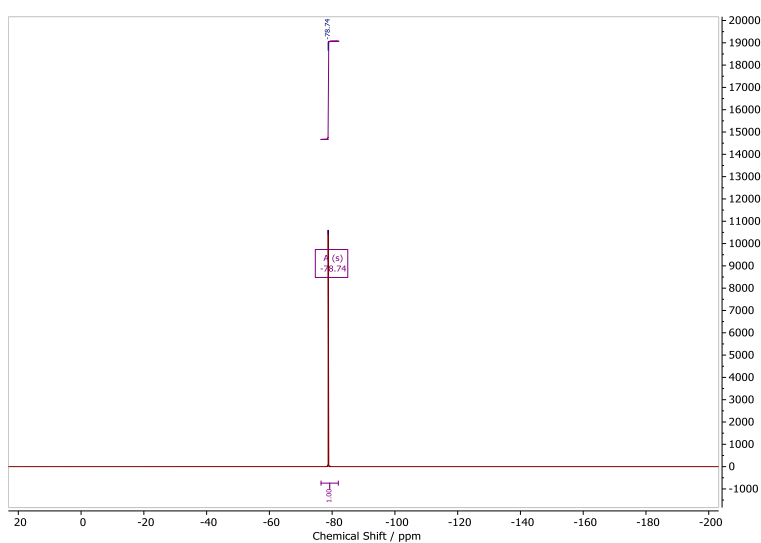

Figure S63  $^{19}\text{F}$  NMR of  $[\text{C}_8\text{C}_1\text{Im}][\text{NTf}_2]_{0.15}\text{Zn}[\text{NTf}_2]_2$  in  $\text{DMSO-}d_6$ .

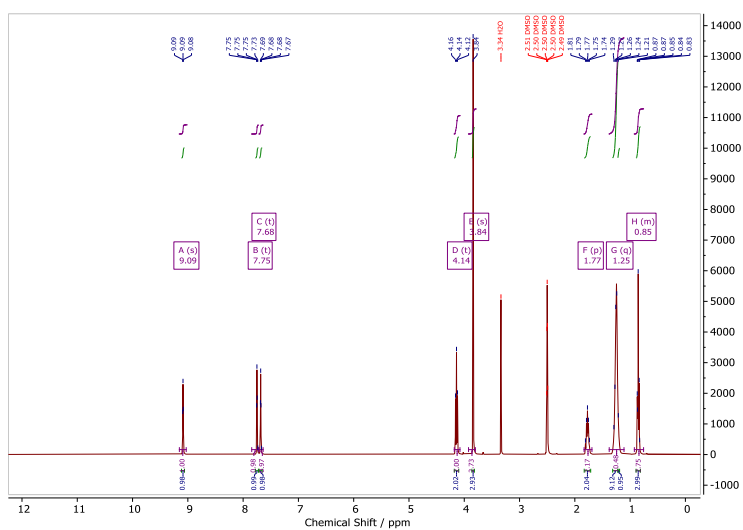

Figure S64  $^1\text{H}$  NMR of  $[\text{C}_8\text{C}_1\text{Im}][\text{NTf}_2]_{0.27}\text{Zn}[\text{NTf}_2]_2$  in  $\text{DMSO-}d_6$ .

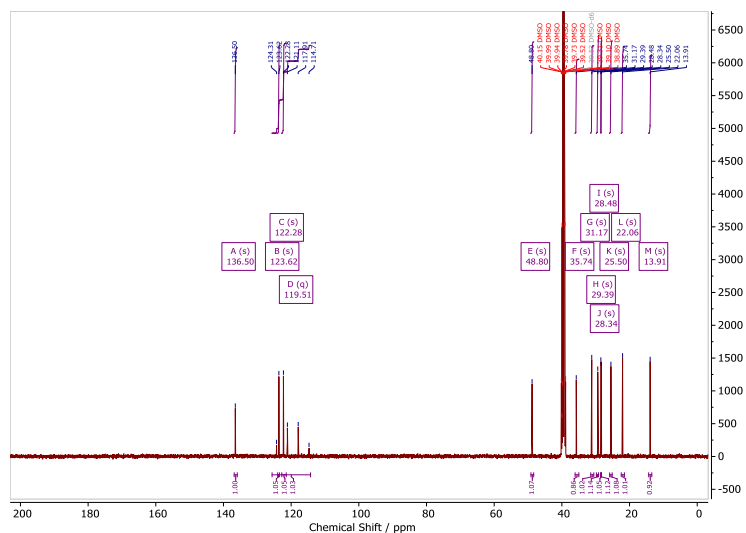

Figure S65  $^{13}\text{C}$  NMR of  $[\text{C}_8\text{C}_1\text{Im}][\text{NTf}_2]_{0.27}\text{Zn}[\text{NTf}_2]_2$  in  $\text{DMSO-}d_6$ .

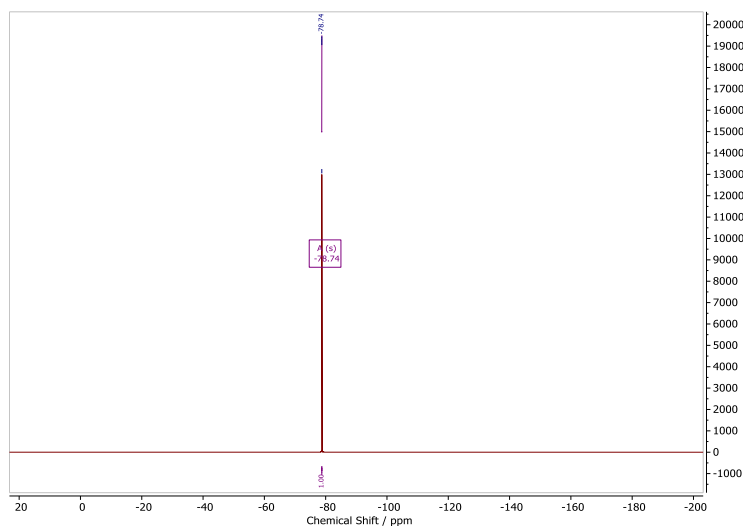

Figure S66  $^{19}\text{F}$  NMR of  $[\text{C}_8\text{C}_1\text{Im}][\text{NTf}_2]_{0.27}\text{Zn}[\text{NTf}_2]_2$  in  $\text{DMSO-}d_6$ .

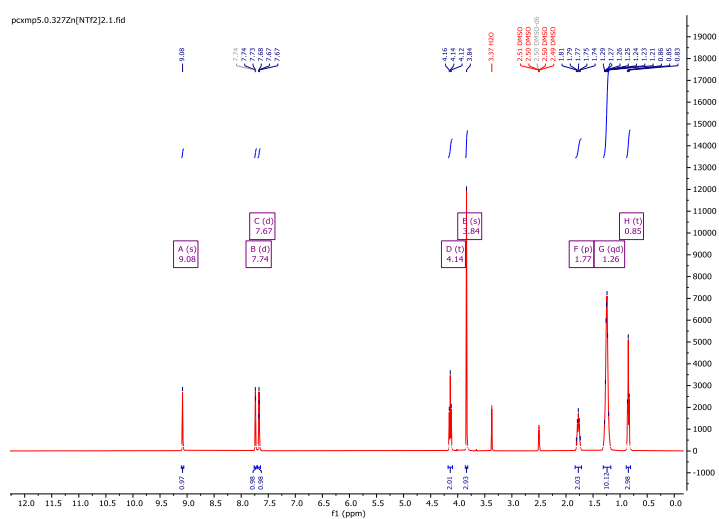

Figure S67  $^1\text{H}$  NMR of  $[\text{C}_8\text{C}_1\text{Im}][\text{NTf}_2]_{0.33}\text{Zn}[\text{NTf}_2]_2$  in  $\text{DMSO-}d_6$ .

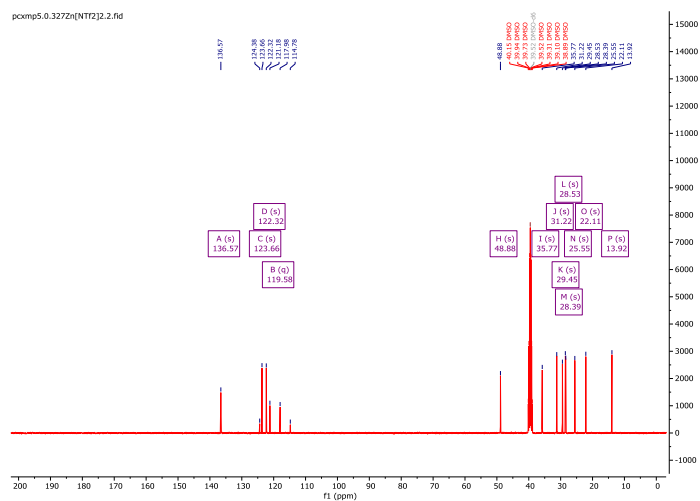

Figure S68  $^{13}\text{C}$  NMR of  $[\text{C}_8\text{C}_1\text{Im}][\text{NTf}_2]_{0.33}\text{Zn}[\text{NTf}_2]_2$  in  $\text{DMSO-}d_6$ .

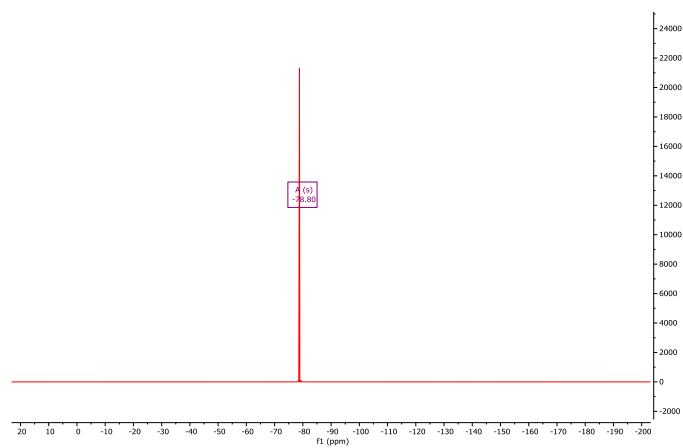

Figure S69  $^{19}\text{F}$  NMR of  $[\text{C}_8\text{C}_1\text{Im}][\text{NTf}_2]_{0.33}\text{Zn}[\text{NTf}_2]_2$  in  $\text{DMSO-}d_6$ .

**Table S1** Thermal parameters from TGA and DSC experiments: melting point ( $T_m$ ), glass transition ( $T_g$ ), mass loss at 1% ( $T_{1\%}$ ), onset temperature ( $T_{onset}$ ), liquid range, effective activation energy of decomposition ( $E_{eff}$ ), temperature at which 1% mass is lost over 10 hours ( $T_{0.01/10}$ ), heat capacity at 20 °C ( $C_p^0$ ), density at 20 °C ( $\rho$ ), and viscosity at 20 °C ( $\eta$ ).

| Cation                             | Anion               | Metal                              | $\chi$ | Thermal parameters / °C |          |           |             |                          | $E_{eff}$ / kJ mol <sup>-1</sup> |                            | $T_{0.01/10}$ / °C | $C_p^0$ / J g <sup>-1</sup> °C <sup>-1</sup> | $\rho$ / g mL <sup>-1</sup> | $\eta$ / mPa·s |
|------------------------------------|---------------------|------------------------------------|--------|-------------------------|----------|-----------|-------------|--------------------------|----------------------------------|----------------------------|--------------------|----------------------------------------------|-----------------------------|----------------|
|                                    |                     |                                    |        | $T_m$                   | $T_g$    | $T_{1\%}$ | $T_{onset}$ | Liquid Range             | MTGA                             | Stepwise                   |                    |                                              |                             |                |
| [C <sub>2</sub> C <sub>1</sub> Im] | [NTf <sub>2</sub> ] |                                    | 0      | -18.23                  |          | 320.8     | 422.0       | 339                      | 122.0 ± 1.3                      | 107.4 ± 2.8                | 317.0              |                                              | 1.524                       | 40.2           |
|                                    |                     | Zn[NTf <sub>2</sub> ] <sub>2</sub> | 0.33   |                         | -60.55   | 270.0     | 348.8       | 331                      | 115.3 ± 0.6                      | 71.9 ± 5.0 / 122.4 ± 4.7   | 257.9              |                                              |                             |                |
| [C <sub>4</sub> C <sub>1</sub> Im] | [NTf <sub>2</sub> ] |                                    | 0      |                         | -104 (f) | 327.4     | 407.8       | 431                      | 118.8 ± 1.0                      | 108 ± 3.1                  | 298.7              |                                              | 1.440                       | 58.4           |
|                                    |                     | Zn[NTf <sub>2</sub> ] <sub>2</sub> | 0.33   |                         | -64.68   | 293.46    | 349.7       | 397                      | 127.1 ± 0.6                      | 92.5 ± 4.0 / 135.4 ± 2.9   | 301.1              |                                              |                             |                |
| [C <sub>8</sub> C <sub>1</sub> Im] | [NTf <sub>2</sub> ] |                                    | 0      |                         | -86 (g)  | 323.9     | 425.2       | 410                      | 124.5 ± 1.1                      | 114.4 ± 1.4                | 298.8              |                                              | 1.324                       | 120.1          |
|                                    |                     | Zn[NTf <sub>2</sub> ] <sub>2</sub> | 0.1    |                         |          | 297.8     | 386.6       |                          |                                  | 68.0 ± 1.7                 | 298.8              | 1.30                                         | 1.389                       | 221.7          |
|                                    |                     |                                    | 0.15   |                         | -74.3    | 297.8     | 369.6       | 372                      |                                  | 57.0 ± 1.6 / 194.1 ± 11.5  | 285.9              | 1.25                                         | 1.422                       | 315.4          |
|                                    |                     |                                    | 0.27   |                         | -65.3    | 283.0     | 376.1       | 348                      |                                  |                            | 278.7              | 1.11                                         | 1.505                       | 841.4          |
|                                    |                     |                                    | 0.33   |                         | -61.6    | 300.9     | 362.6       | 363                      | 136.0 ± 1.0                      | 66.5 ± 2.2 / 125.4 ± 2.5   | 299.5              | 1.11                                         | 1.546                       | 1490.6         |
|                                    |                     | Co[NTf <sub>2</sub> ] <sub>2</sub> | 0.1    |                         | -78.3    | 360.25    | 377.8       | 439                      |                                  | 84.3 ± 4.9 / 149.2 ± 4.2   | 334.3              | 1.32                                         | 1.387                       | 224.8          |
|                                    |                     |                                    | 0.15   |                         | -74.0    | 352.4     | 377.4       | 426                      |                                  | 54.9 ± 3.3 / 164.4 ± 7.9   | 332.7              | 1.31                                         | 1.418                       | 335.2          |
|                                    |                     |                                    | 0.27   |                         | -64.6    | 349.5     | 381.1       | 414                      |                                  | 75.1 ± 6.3 / 151.0 ± 6.5   | 327.7              | 1.21                                         | 1.496                       | 986.9          |
|                                    |                     |                                    | 0.33   |                         | -61.3    | 314.6     | 360.6       | 376                      | 137.2 ± 0.6                      | 88.9 ± 2.4 / 159.5 ± 3.9   | 310.3              | 1.15                                         | 1.541                       | 1695.2         |
|                                    |                     | Mg[NTf <sub>2</sub> ] <sub>2</sub> | 0.1    |                         | -78.5    | 328.76    | 370.8       | 407                      |                                  | 97.5 ± 3.6                 | 350.7              | 1.24                                         | 1.378                       | 238.8          |
|                                    |                     |                                    | 0.15   |                         | -73.6    | 325.83    | 381.5       | 399                      |                                  | 98.2 ± 2.1 / 207.0 ± 18.2  | 348.1              | 1.20                                         | 1.407                       | 364.0          |
|                                    |                     |                                    | 0.27   |                         | -64.3    | 325.51    | 370.0       | 390                      |                                  | 95.4 ± 4.4 / 218.0 ± 22.4  | 322.2              | 1.17                                         | 1.472                       | 1177.1         |
|                                    |                     |                                    | 0.32   |                         | -58.9    | 310.06    | 370.0       | 369                      | 187.1 ± 31.7                     | 89.9 ± 13.5 / 180.7 ± 11.9 | 321.0              | 1.08                                         | 1.503                       | 2263.8         |
|                                    |                     | Li[NTf <sub>2</sub> ]              | 0.1    |                         | -79.5    | 330.9     | 407.6       | 410                      |                                  | 69.2 ± 2.0 / 113.7 ± 6.0   | 327.4              | 1.38                                         | 1.350                       | 176.8          |
|                                    |                     |                                    | 0.15   |                         | -78.7    | 352.3     | 384.4       | 431                      |                                  | 83.3 ± 5.8 / 142.6 ± 8.3   | 317.4              | 1.31                                         | 1.366                       | 223.4          |
|                                    |                     |                                    | 0.27   |                         | -71.7    | 349.3     | 391.3       | 421                      |                                  | 70.6 ± 4.6 / 144.1 ± 6.3   | 313.0              | 1.23                                         | 1.404                       | 429.9          |
|                                    | 0.33                |                                    | -67.2  | 321.24                  | 403.7    | 388       | 183.8 ± 5.1 | 98.9 ± 5.2 / 139.6 ± 1.6 | 314.7                            |                            | 1.430              | 710.6                                        |                             |                |
| Ni[NTf <sub>2</sub> ] <sub>2</sub> | 0.33                |                                    |        | -56.8                   | 197.1    | 359.7     | 254         | 130.5 ± 31.7             | 70.4 ± 4.6 / 144.1 ± 6.3         | 313.6                      | 1.26               | 1.531                                        | 1137.7                      |                |

## DSC Data

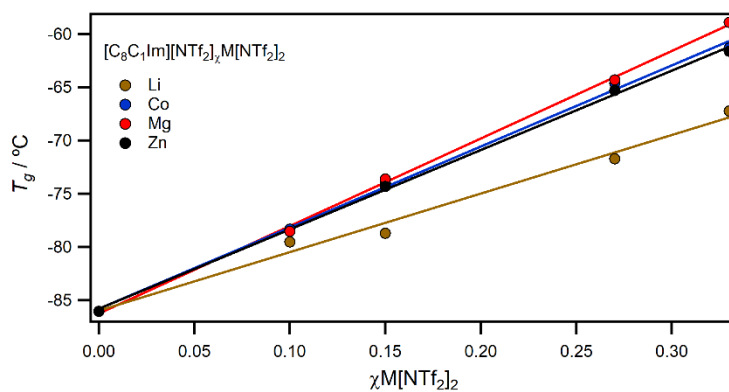

**Figure S70** DSC measured  $T_g$  values for  $[C_8C_1Im][NTf_2]_xM[NTf_2]_2$  solutions recorded at  $10^\circ C \text{ min}^{-1}$  in a Tzero alodined aluminium hermetic pan under an  $N_2$  purge gas at  $50 \text{ mL min}^{-1}$ .

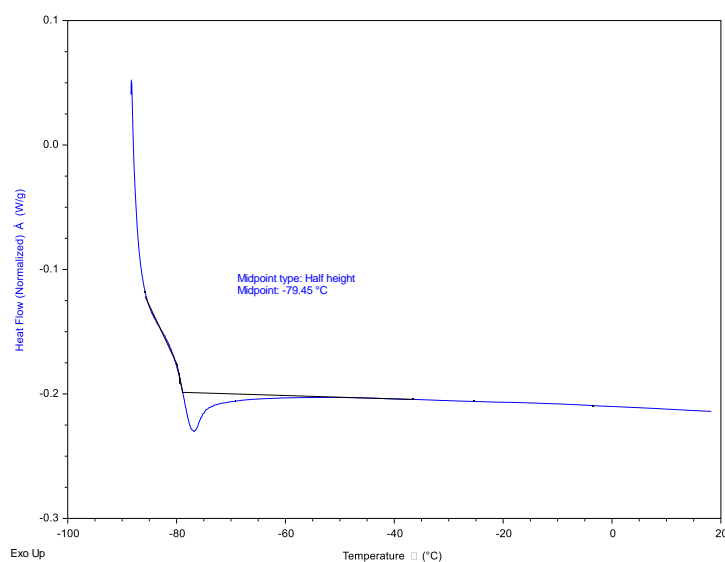

**Figure S71** DSC thermogram of  $[C_8C_1Im][NTf_2]_{0.1}Li[NTf_2]$  at  $10^\circ C \text{ min}^{-1}$  in a Tzero alodined aluminium hermetic pan under an  $N_2$  purge gas at  $50 \text{ mL min}^{-1}$ .



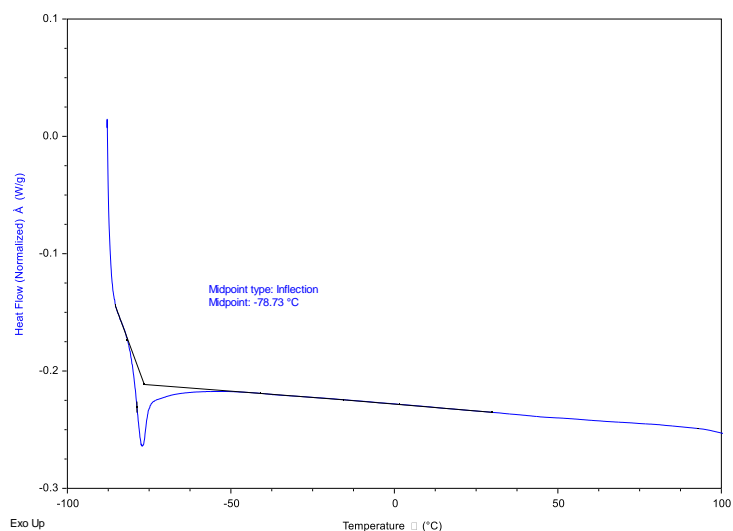

**Figure S72** DSC thermogram of  $[\text{C}_8\text{C}_1\text{Im}][\text{NTf}_2]_{0.15}\text{Li}[\text{NTf}_2]$  at  $10^\circ\text{C min}^{-1}$  in a Tzero alodined aluminium hermetic pan under an  $\text{N}_2$  purge gas at  $50 \text{ mL min}^{-1}$ . [Note: inflection point used because of the proximity of the glass transition to the start-up hook].

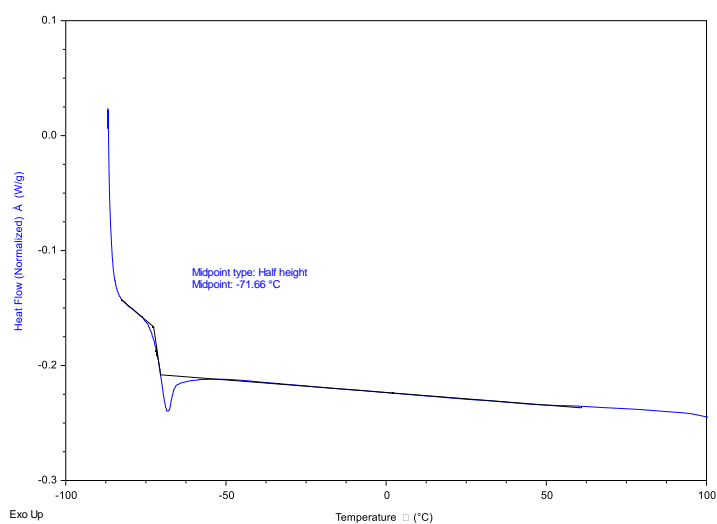

**Figure S73** DSC thermogram of  $[\text{C}_8\text{C}_1\text{Im}][\text{NTf}_2]_{0.27}\text{Li}[\text{NTf}_2]$  at  $10^\circ\text{C min}^{-1}$  in a Tzero alodined aluminium hermetic pan under an  $\text{N}_2$  purge gas at  $50 \text{ mL min}^{-1}$ .

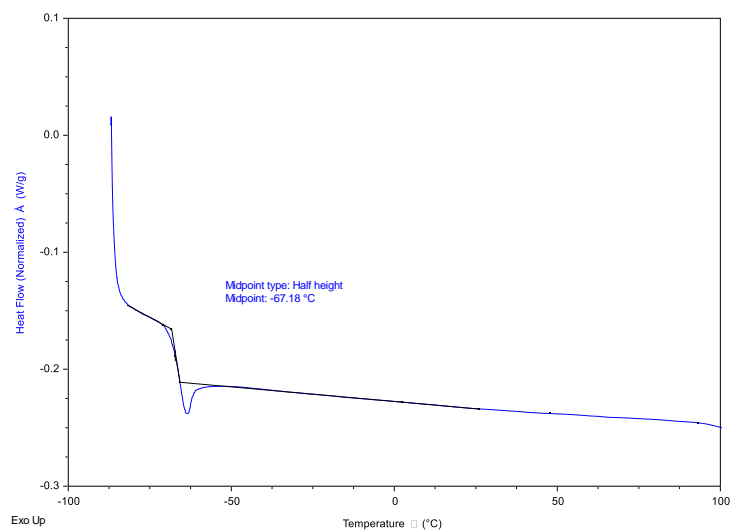

**Figure S74** DSC thermogram of  $[\text{C}_8\text{C}_1\text{Im}][\text{NTf}_2]_{0.33}\text{Li}[\text{NTf}_2]$  at  $10^\circ\text{C min}^{-1}$  in a Tzero alodined aluminium hermetic pan under an  $\text{N}_2$  purge gas at  $50 \text{ mL min}^{-1}$ .

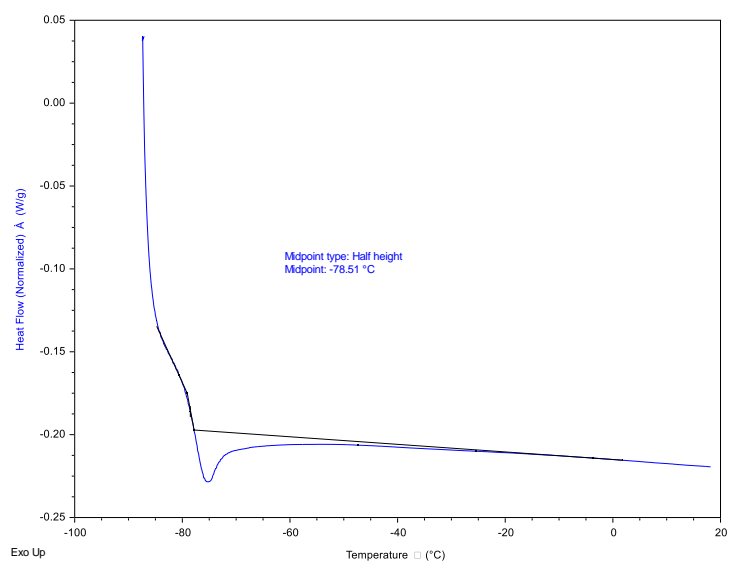

**Figure S75** DSC thermogram of  $[\text{C}_8\text{C}_1\text{Im}][\text{NTf}_2]_{0.1}\text{Mg}[\text{NTf}_2]_2$  at  $10^\circ\text{C min}^{-1}$  in a Tzero alodined aluminium hermetic pan under an  $\text{N}_2$  purge gas at  $50 \text{ mL min}^{-1}$ .

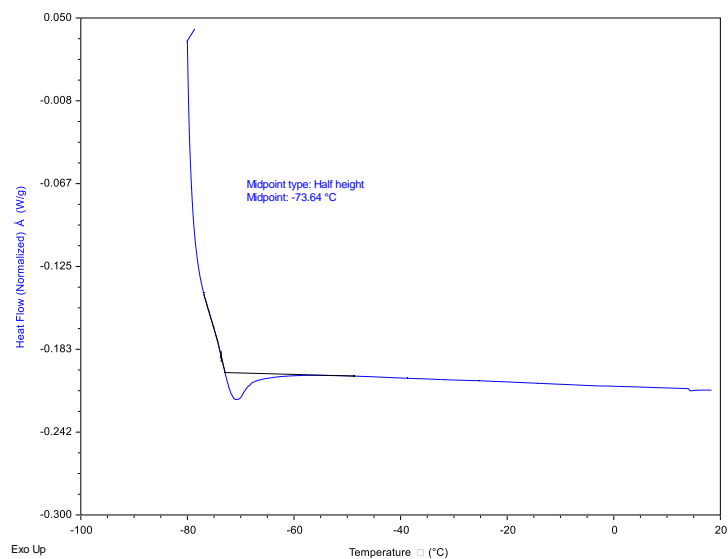

**Figure S76** DSC thermogram of  $[C_8C_1Im][NTf_2]_{0.15}Mg[NTf_2]_2$  at  $10^\circ C \text{ min}^{-1}$  in a Tzero alodined aluminium hermetic pan under an  $N_2$  purge gas at  $50 \text{ mL min}^{-1}$ .

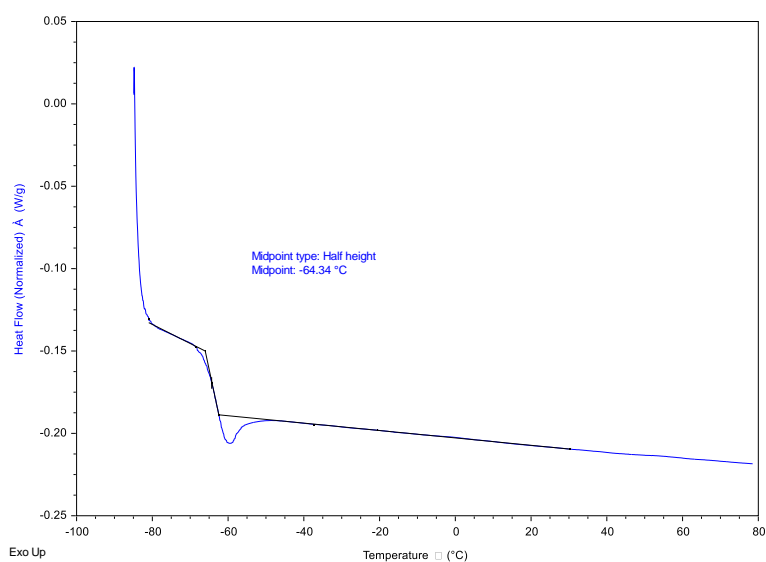

**Figure S77** DSC thermogram of  $[C_8C_1Im][NTf_2]_{0.27}Mg[NTf_2]_2$  at  $10^\circ C \text{ min}^{-1}$  in a Tzero alodined aluminium hermetic pan under an  $N_2$  purge gas at  $50 \text{ mL min}^{-1}$ . [Note: inflection point used because of the proximity of the glass transition to the start-up hook].

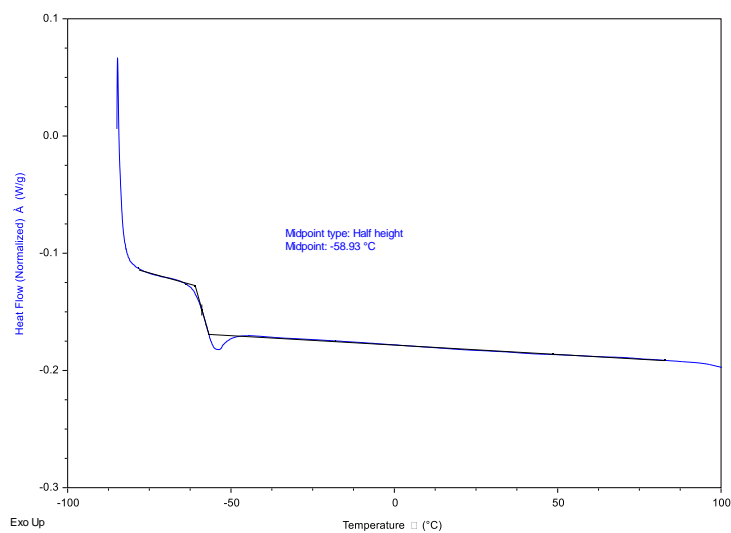

**Figure S78** DSC thermogram of  $[\text{C}_8\text{C}_1\text{Im}][\text{NTf}_2]_{0.32}\text{Mg}[\text{NTf}_2]_2$  at  $10^\circ\text{C min}^{-1}$  in a Tzero alodined aluminium hermetic pan under an  $\text{N}_2$  purge gas at  $50 \text{ mL min}^{-1}$ .

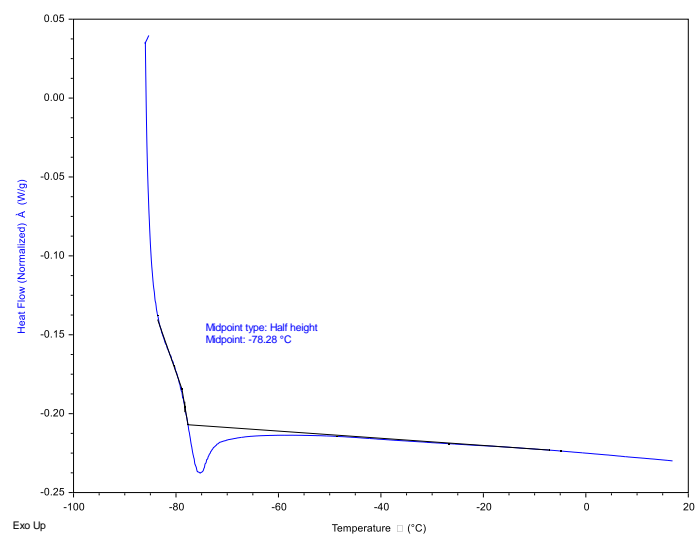

**Figure S79** DSC thermogram of  $[\text{C}_8\text{C}_1\text{Im}][\text{NTf}_2]_{0.1}\text{Co}[\text{NTf}_2]_2$  at  $10^\circ\text{C min}^{-1}$  in a Tzero alodined aluminium hermetic pan under an  $\text{N}_2$  purge gas at  $50 \text{ mL min}^{-1}$ .

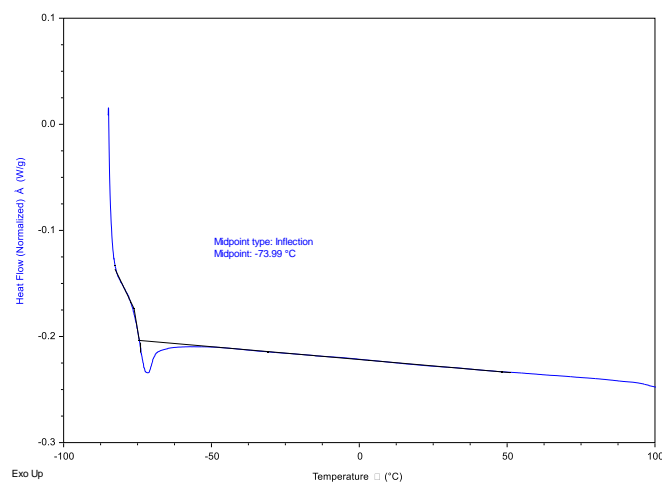

**Figure S80** DSC thermogram of  $[\text{C}_8\text{C}_1\text{Im}][\text{NTf}_2]_{0.15}\text{Co}[\text{NTf}_2]_2$  at  $10^\circ\text{C min}^{-1}$  in a Tzero alodined aluminium hermetic pan under an  $\text{N}_2$  purge gas at  $50 \text{ mL min}^{-1}$ . [Note: inflection point used because of the proximity of the glass transition to the start-up hook].

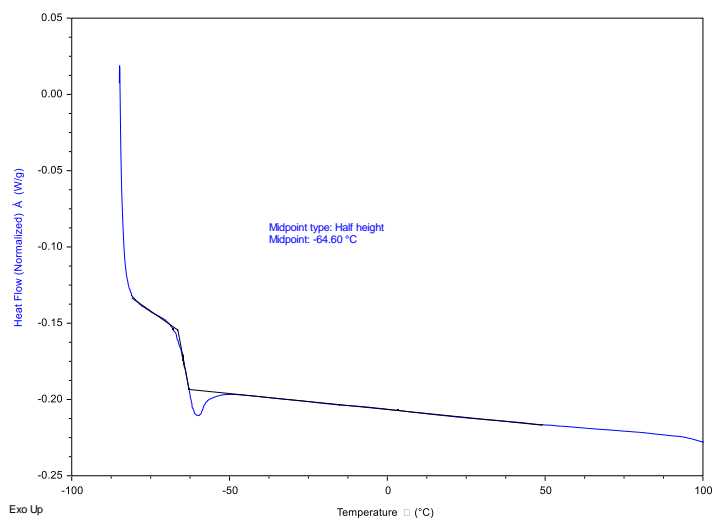

**Figure S81** DSC thermogram of  $[\text{C}_8\text{C}_1\text{Im}][\text{NTf}_2]_{0.27}\text{Co}[\text{NTf}_2]_2$  at  $10^\circ\text{C min}^{-1}$  in a Tzero alodined aluminium hermetic pan under an  $\text{N}_2$  purge gas at  $50 \text{ mL min}^{-1}$ .

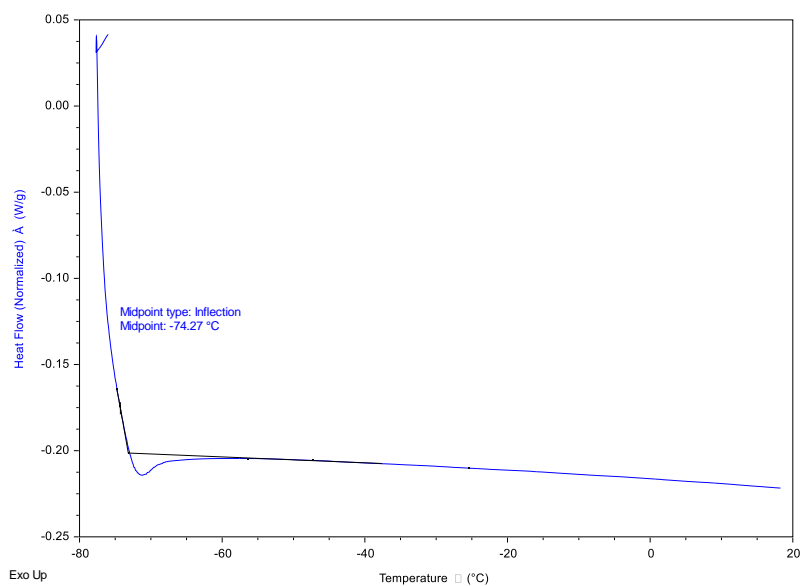

**Figure S82** DSC thermogram of  $[\text{C}_8\text{C}_1\text{Im}][\text{NTf}_2]_{0.15}\text{Zn}[\text{NTf}_2]_2$  at  $10^\circ\text{C min}^{-1}$  in a Tzero alodined aluminium hermetic pan under an  $\text{N}_2$  purge gas at  $50 \text{ mL min}^{-1}$ . [Note: inflection point used because of the proximity of the glass transition to the start-up hook].

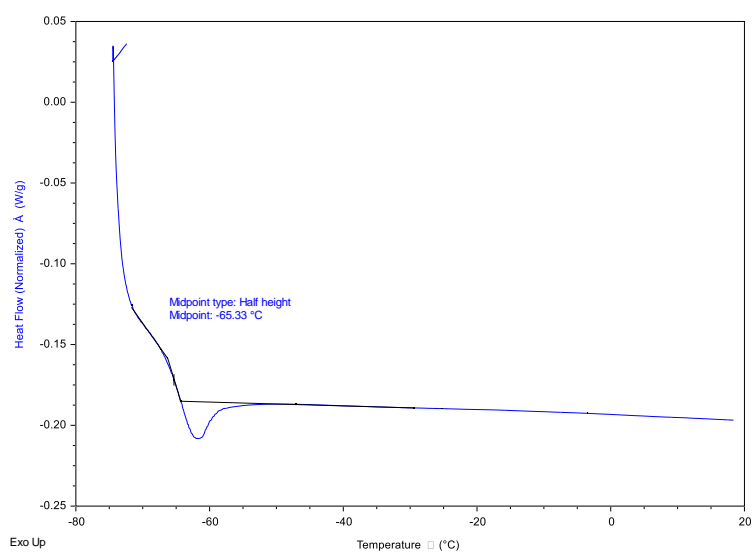

**Figure S83** DSC thermogram of  $[\text{C}_8\text{C}_1\text{Im}][\text{NTf}_2]_{0.27}\text{Zn}[\text{NTf}_2]_2$  at  $10^\circ\text{C min}^{-1}$  in a Tzero alodined aluminium hermetic pan under an  $\text{N}_2$  purge gas at  $50 \text{ mL min}^{-1}$ .

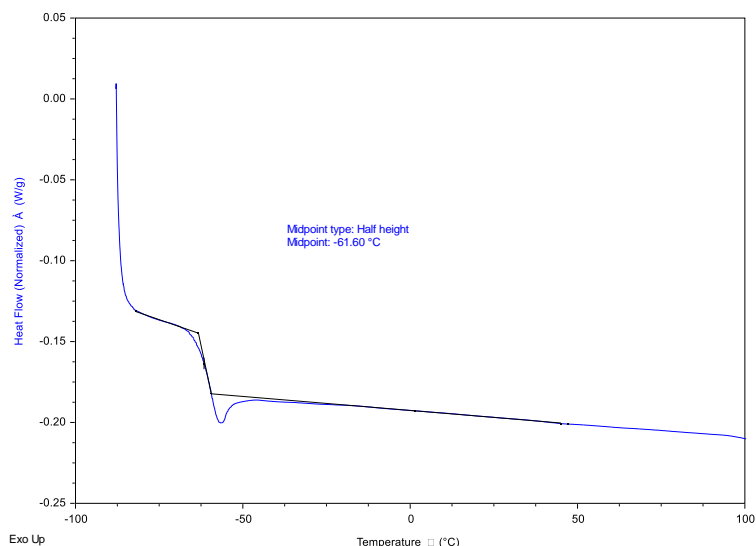

**Figure S84** DSC thermogram of  $[\text{C}_8\text{C}_1\text{Im}][\text{NTf}_2]_{0.33}\text{Zn}[\text{NTf}_2]_2$  at  $10^\circ\text{C min}^{-1}$  in a Tzero alodined aluminium hermetic pan under an  $\text{N}_2$  purge gas at  $50 \text{ mL min}^{-1}$ .

### TGA Data

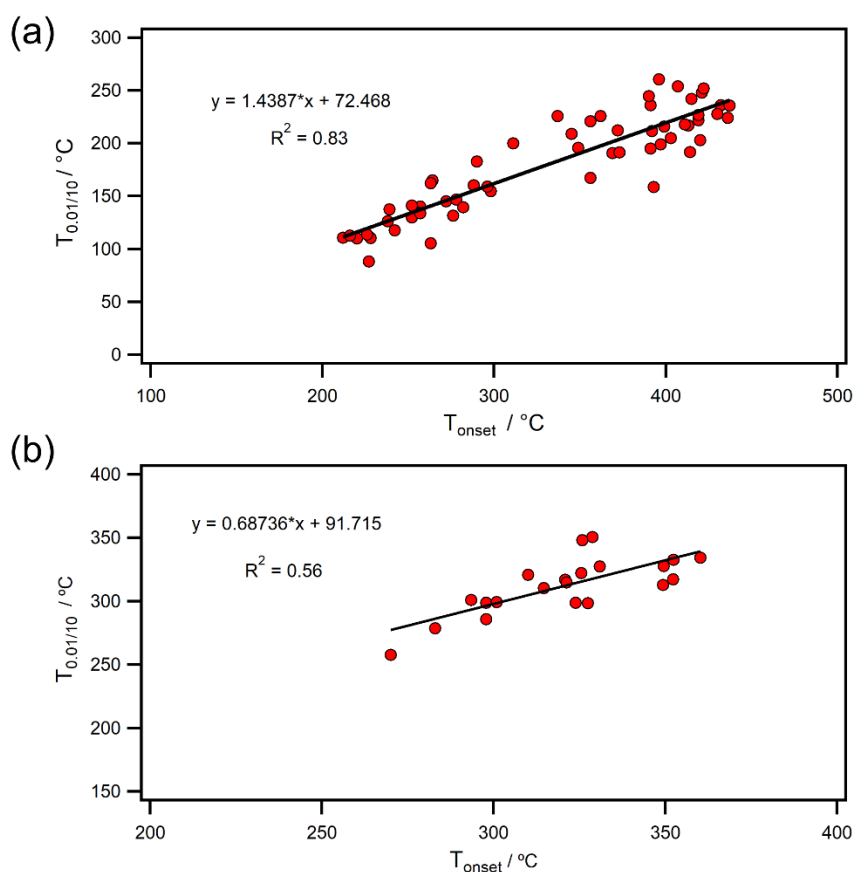

**Figure S85** Correlations of long term thermal stability parameter  $T_{0.01/10}$  and short term thermal stability parameter  $T_{1\%}$  for: (a) data taken from *Ind. Eng. Chem. Res.*, 2014, 53, 20, 8651–8664 for metal-free ionic liquids, and (b) metal ionic liquids from this work.

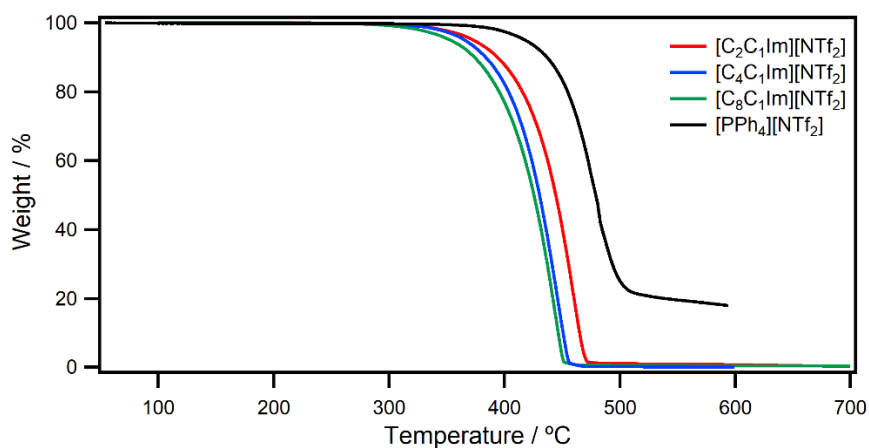

**Figure S86** TGA data for monocationic  $[C_n C_1 \text{Im}][\text{NTf}_2]$  and  $[\text{PPh}_4][\text{NTf}_2]$  in  $50 \text{ mL min}^{-1} \text{ N}_2$  at  $10 \text{ °C min}^{-1}$ .

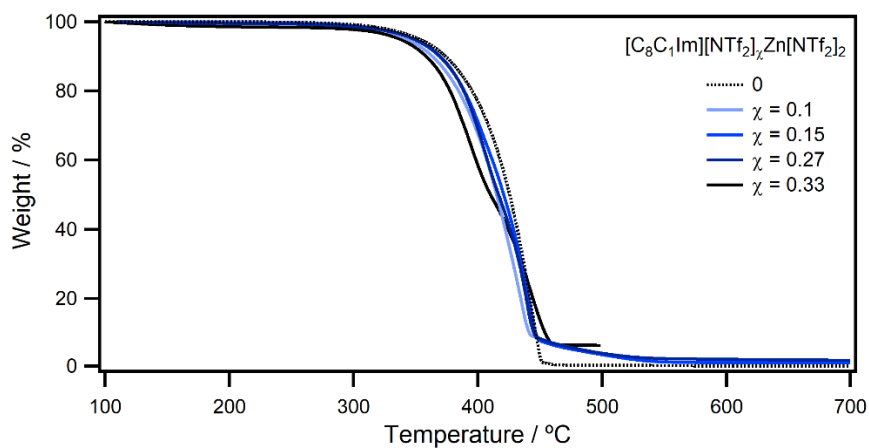

**Figure S87** TGA data for  $[\text{C}_8 \text{C}_1 \text{Im}][\text{NTf}_2]_x \text{Zn}[\text{NTf}_2]_2$  in  $50 \text{ mL min}^{-1} \text{ N}_2$  at  $10 \text{ °C min}^{-1}$ .

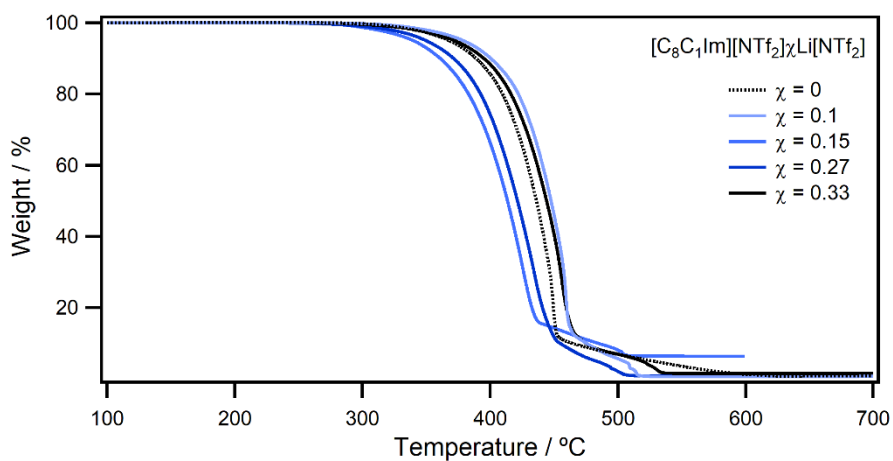

**Figure S88** TGA data for  $[\text{C}_8 \text{C}_1 \text{Im}][\text{NTf}_2]_x \text{Li}[\text{NTf}_2]$  in  $50 \text{ mL min}^{-1} \text{ N}_2$  at  $10 \text{ °C min}^{-1}$ .



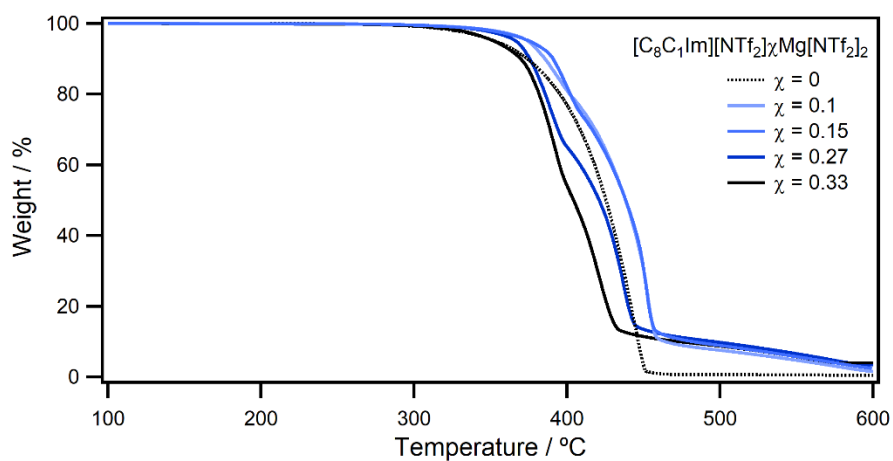

Figure S89 TGA data for  $[C_8C_1Im][NTf_2]_xMg[NTf_2]_2$  in  $50\text{ mL min}^{-1} N_2$  at  $10\text{ }^\circ\text{C min}^{-1}$ .

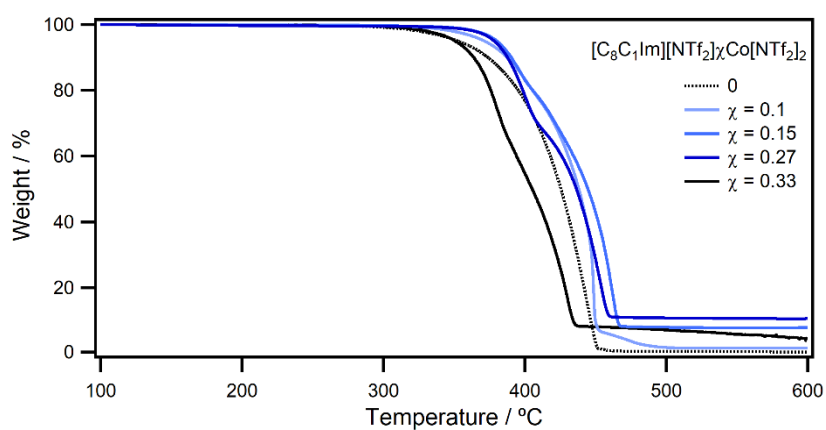

Figure S90 TGA data for  $[C_8C_1Im][NTf_2]_xCo[NTf_2]_2$  in  $50\text{ mL min}^{-1} N_2$  at  $10\text{ }^\circ\text{C min}^{-1}$ .

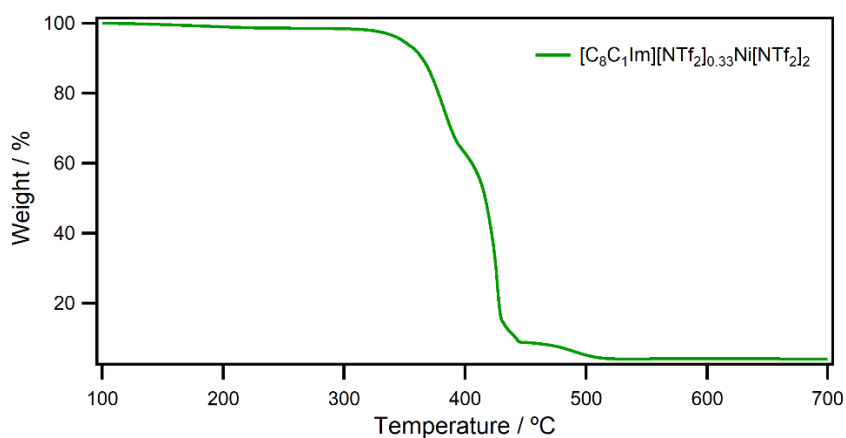

Figure S91 TGA data for  $[C_8C_1Im][NTf_2]_xNi[NTf_2]_2$  in  $50\text{ mL min}^{-1} N_2$  at  $10\text{ }^\circ\text{C min}^{-1}$ .

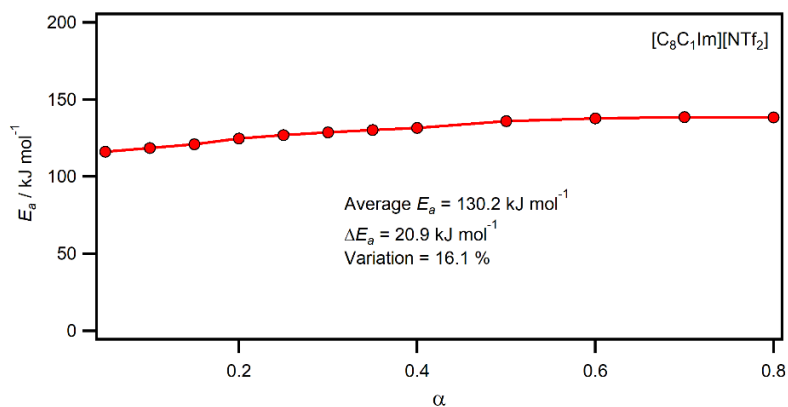

**Figure S92** Activation energy with degree of conversion for  $[\text{C}_8\text{C}_1\text{Im}][\text{NTf}_2]$  in  $50 \text{ mL min}^{-1} \text{ N}_2$  from Flynn-Wall isoconversion.

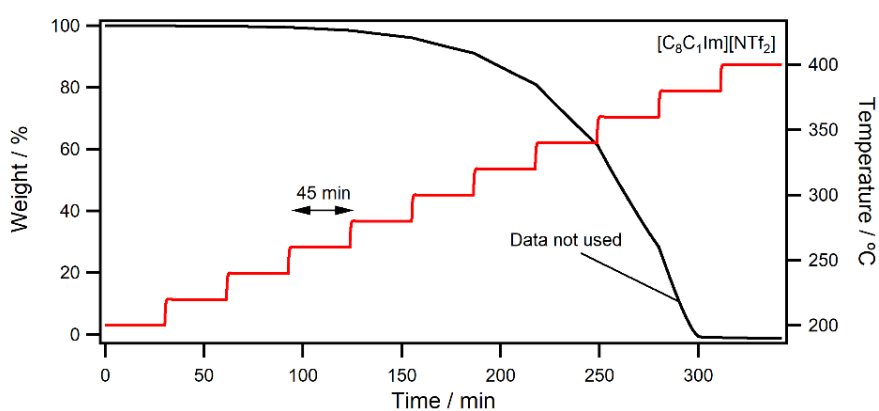

**Figure S93** Stepwise TGA data showing weight against time for  $[\text{C}_8\text{C}_1\text{Im}][\text{NTf}_2]$  in  $50 \text{ mL min}^{-1} \text{ N}_2$  at  $10 \text{ }^{\circ}\text{C min}^{-1}$ .

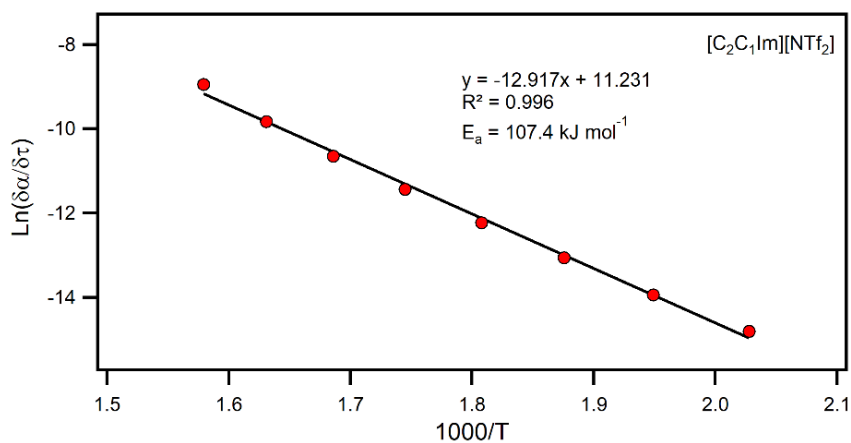

**Figure S94** Arrhenius plot for  $[\text{C}_2\text{C}_1\text{Im}][\text{NTf}_2]$ .

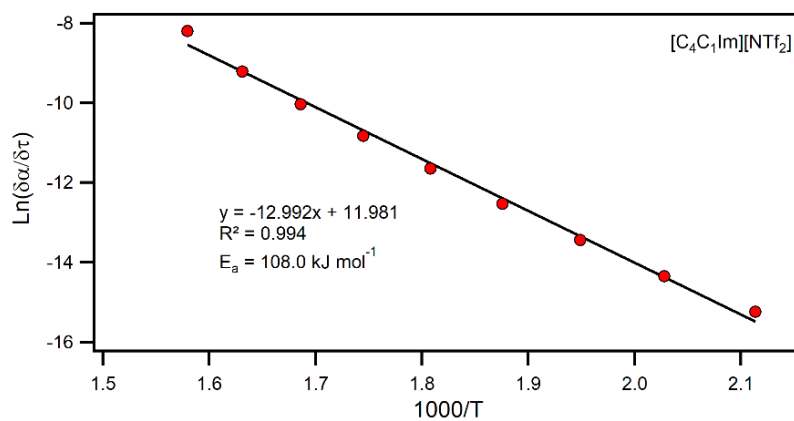

Figure S95 Arrhenius plot for  $[C_4C_1Im][NTf_2]$ .

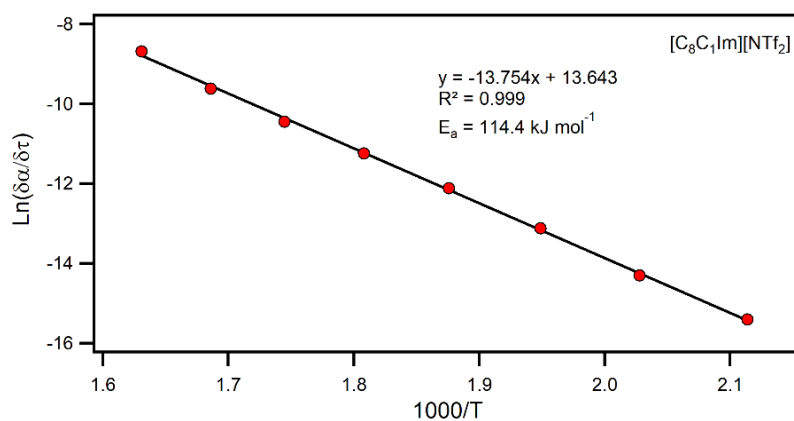

Figure S96 Arrhenius plot for  $[C_8C_1Im][NTf_2]$ .

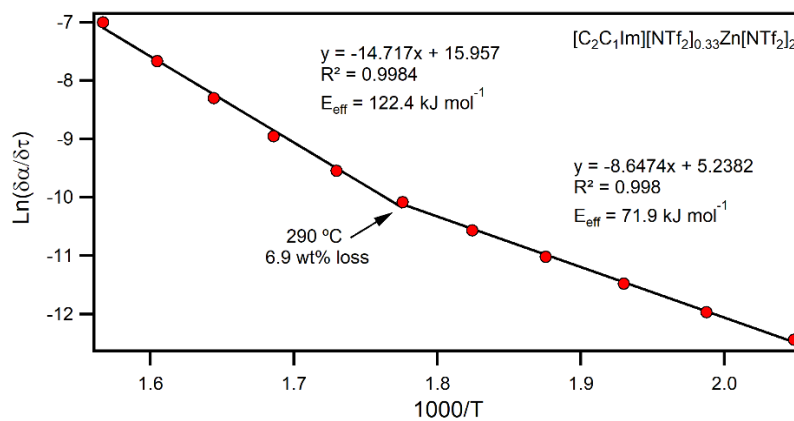

Figure S97 Arrhenius plot for  $[C_2C_1Im][NTf_2]_{0.33}Zn[NTf_2]_2$  with two linear fits and the inflection point temperature and weight loss.

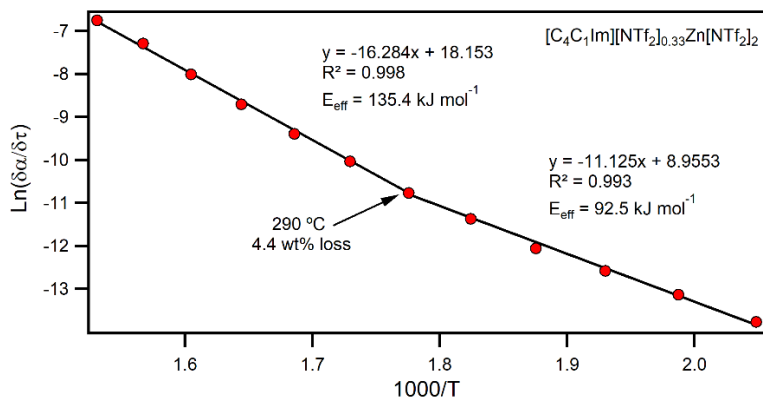

**Figure S98** Arrhenius plot for  $[C_4C_1Im][NTf_2]_{0.33}Zn[NTf_2]_2$  with two linear fits and the inflection point temperature and weight loss.

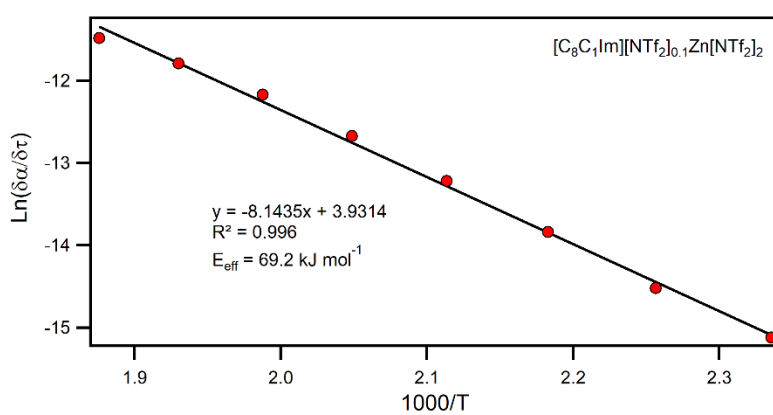

**Figure S99** Arrhenius plot for  $[C_8C_1Im][NTf_2]_{0.1}Zn[NTf_2]_2$  with two linear fits and the inflection point temperature and weight loss.

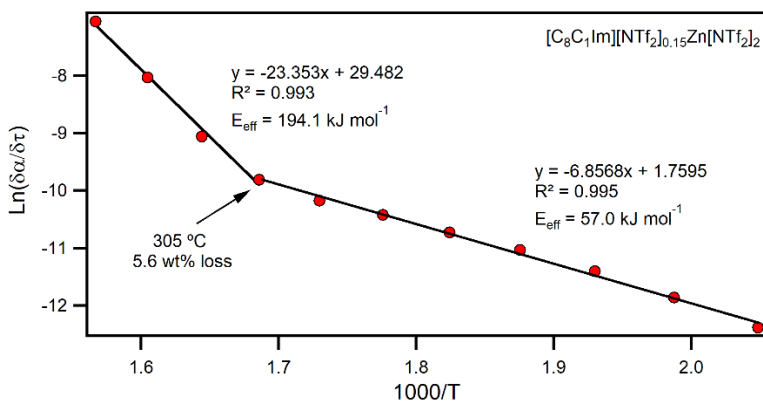

**Figure S100** Arrhenius plot for  $[C_8C_1Im][NTf_2]_{0.15}Zn[NTf_2]_2$  with two linear fits and the inflection point temperature and weight loss.

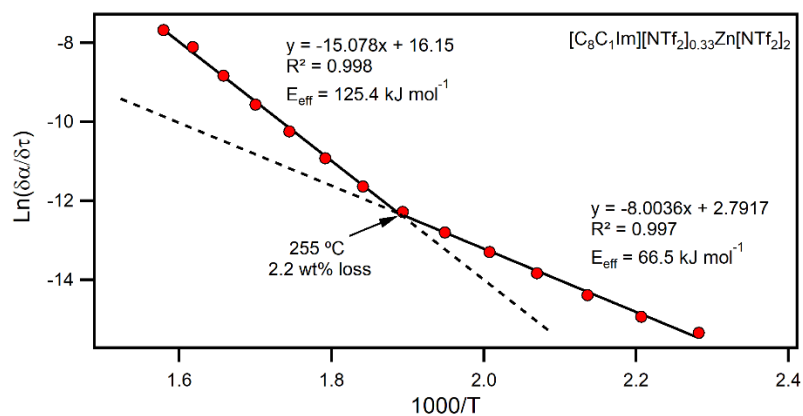

**Figure S101** Arrhenius plot for  $[C_8C_1Im][NTf_2]_{0.33}Zn[NTf_2]_2$  with two linear fits and the inflection point temperature and weight loss.

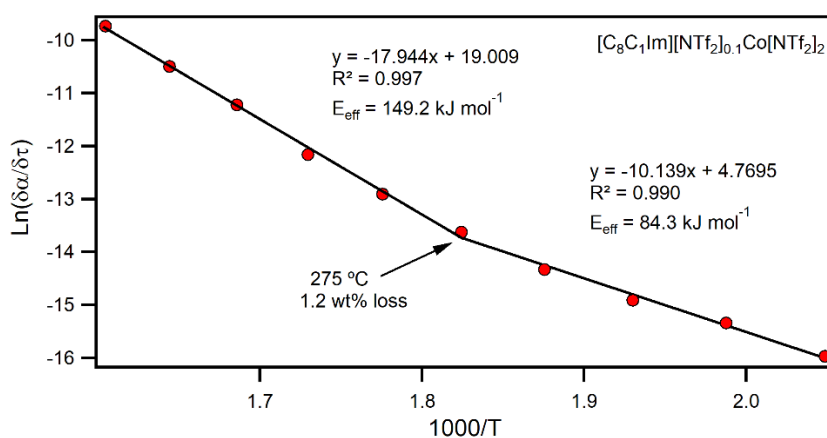

**Figure S102** Arrhenius plot for  $[C_8C_1Im][NTf_2]_{0.1}Co[NTf_2]_2$  with two linear fits and the inflection point temperature and weight loss.

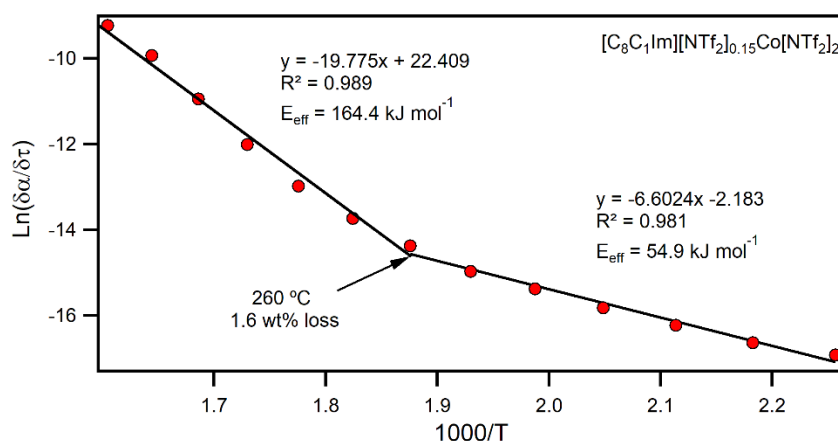

**Figure S103** Arrhenius plot for  $[C_8C_1Im][NTf_2]_{0.15}Co[NTf_2]_2$  with two linear fits and the inflection point temperature and weight loss.

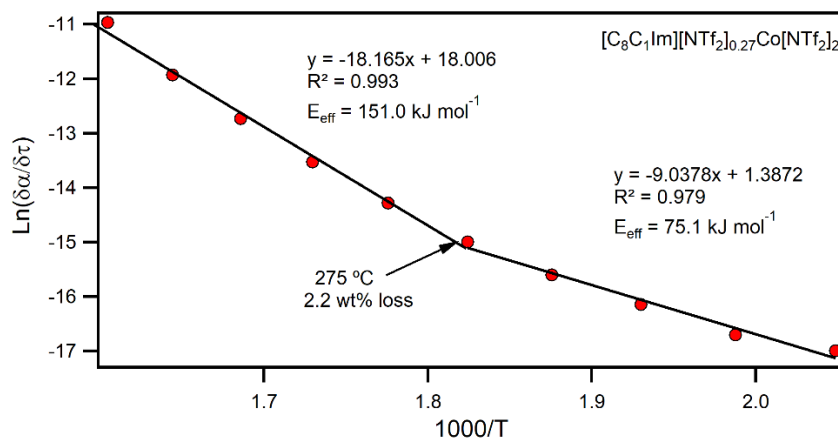

**Figure S104** Arrhenius plot for  $[C_8C_1Im][NTf_2]_{0.27}Co[NTf_2]_2$  with two linear fits and the inflection point temperature and weight loss.

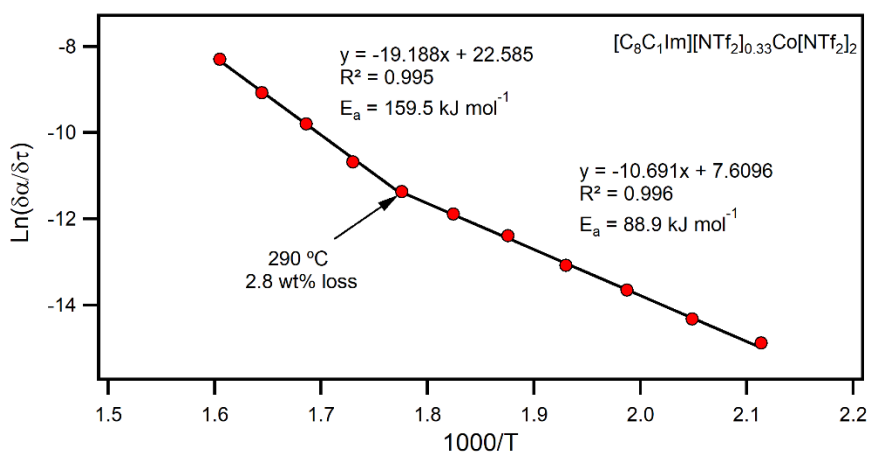

**Figure S105** Arrhenius plot for  $[C_8C_1Im][NTf_2]_{0.33}Co[NTf_2]_2$  with two linear fits and the inflection point temperature and weight loss.

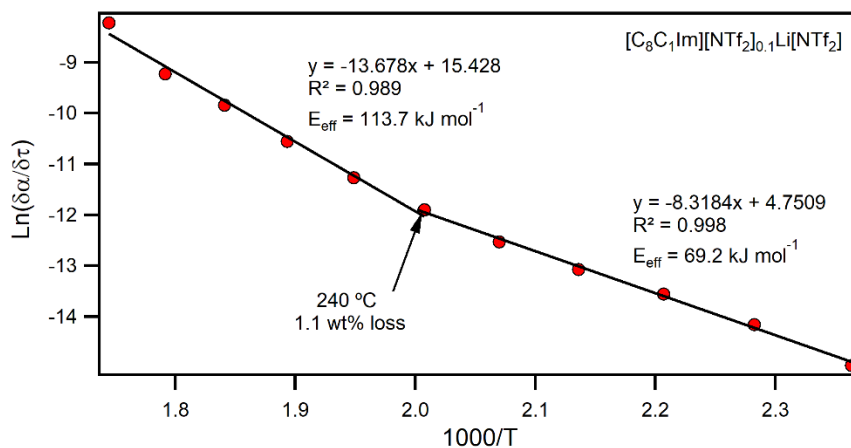

**Figure S106** Arrhenius plot for  $[C_8C_1Im][NTf_2]_{0.1}Li[NTf_2]$  with two linear fits and the inflection point temperature and weight loss.

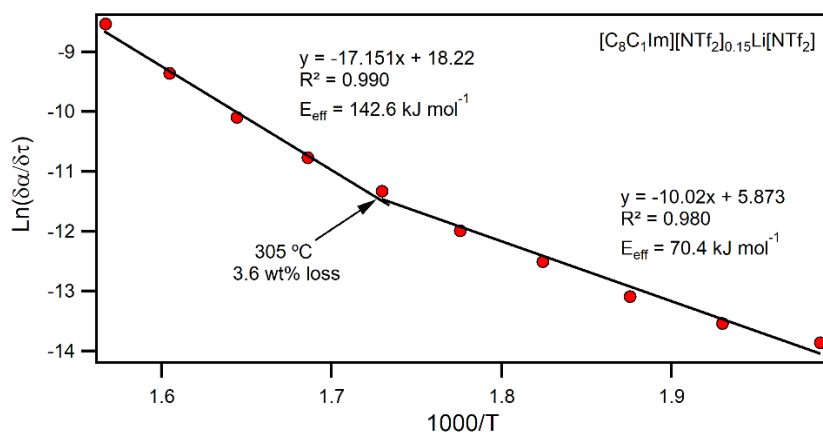

**Figure S107** Arrhenius plot for  $[C_8C_1Im][NTf_2]_{0.15}Li[NTf_2]$  with two linear fits and the inflection point temperature and weight loss.

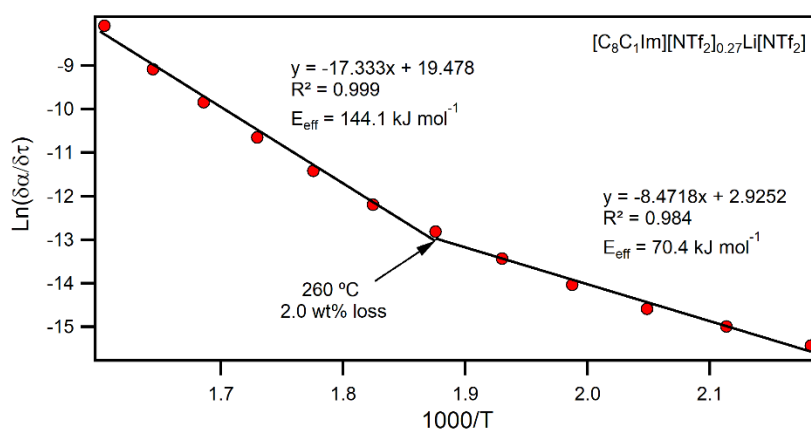

**Figure S108** Arrhenius plot for  $[C_8C_1Im][NTf_2]_{0.27}Li[NTf_2]$  with two linear fits and the inflection point temperature and weight loss.

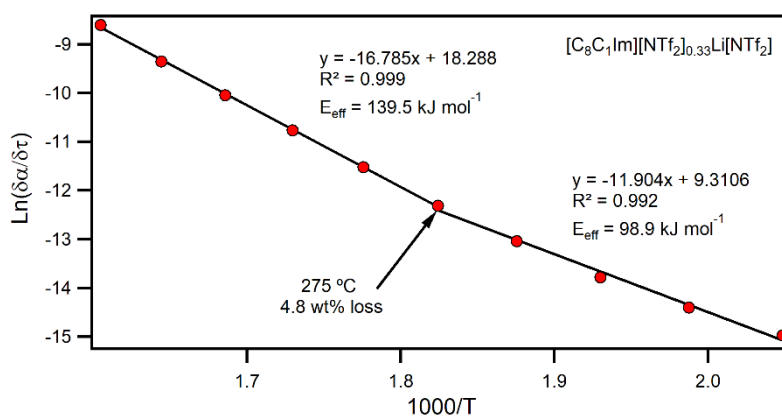

**Figure S109** Arrhenius plot for  $[C_8C_1Im][NTf_2]_{0.33}Li[NTf_2]$  with two linear fits and the inflection point temperature and weight loss.

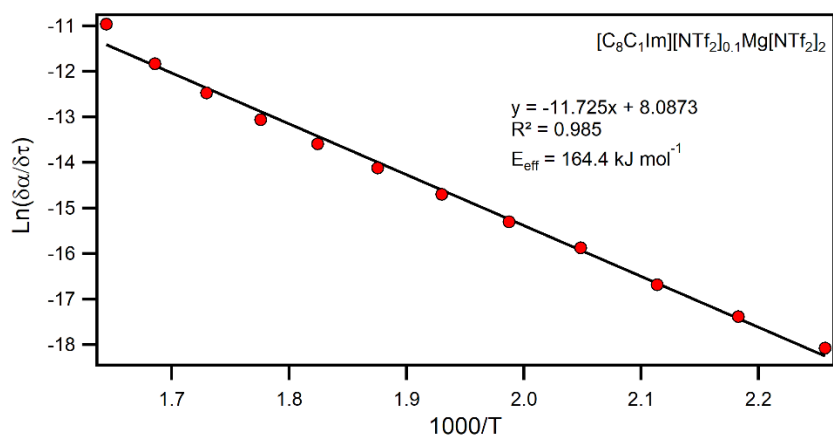

**Figure S110** Arrhenius plot for [C<sub>8</sub>C<sub>1</sub>Im][NTf<sub>2</sub>]<sub>0.1</sub>Mg[NTf<sub>2</sub>]<sub>2</sub> with two linear fits and the inflection point temperature and weight loss.

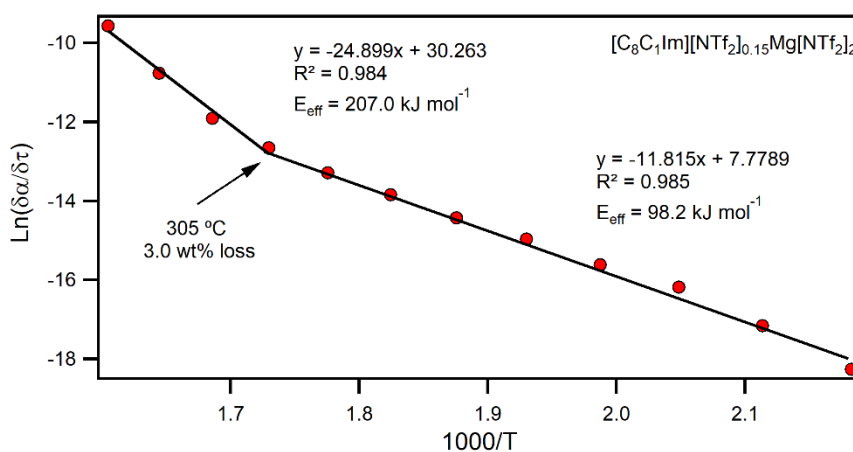

**Figure S111** Arrhenius plot for [C<sub>8</sub>C<sub>1</sub>Im][NTf<sub>2</sub>]<sub>0.15</sub>Mg[NTf<sub>2</sub>]<sub>2</sub> with two linear fits and the inflection point temperature and weight loss.

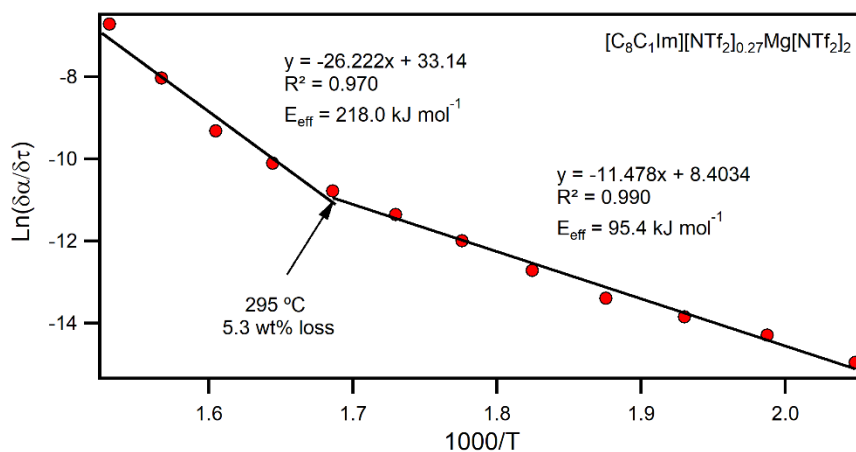

**Figure S112** Arrhenius plot for [C<sub>8</sub>C<sub>1</sub>Im][NTf<sub>2</sub>]<sub>0.27</sub>Mg[NTf<sub>2</sub>]<sub>2</sub> with two linear fits and the inflection point temperature and weight loss.



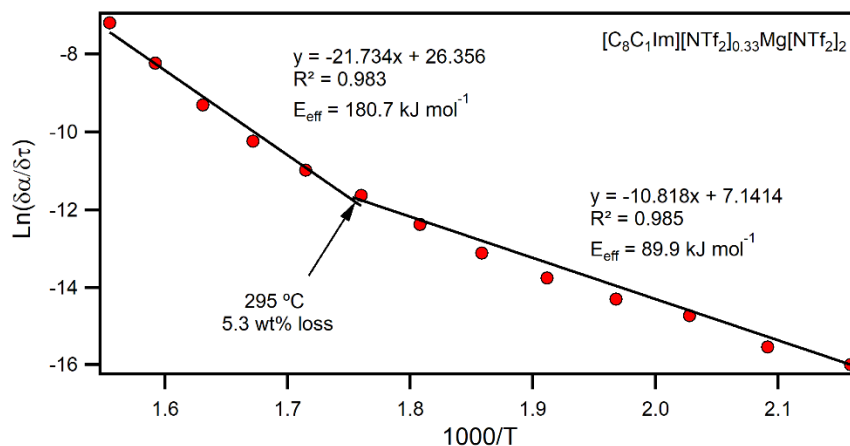

**Figure S113** Arrhenius plot for  $[C_8C_1Im][NTf_2]_{0.33}Mg[NTf_2]_2$  with two linear fits and the inflection point temperature and weight loss.

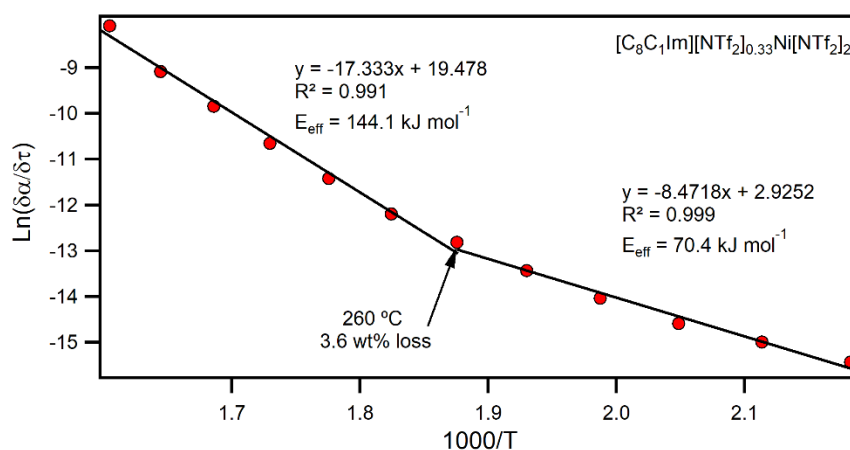

**Figure S114** Arrhenius plot for  $[C_8C_1Im][NTf_2]_{0.33}Ni[NTf_2]_2$  with two linear fits and the inflection point temperature and weight loss.

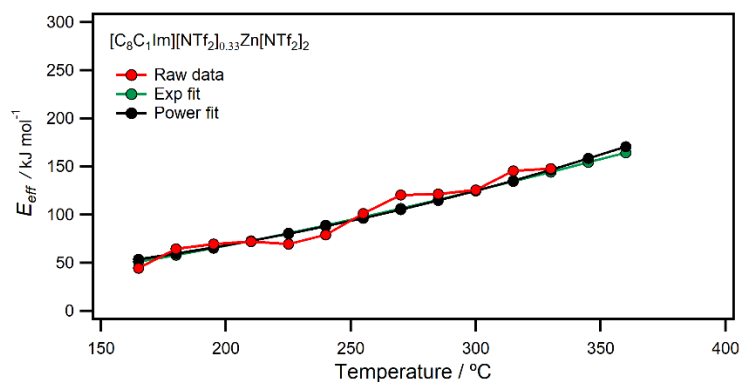

**Figure S115** Effective activation energies from stepwise isothermal TGA data of  $[C_8C_1Im][NTf_2]_{0.33}Zn[NTf_2]_2$  ( $15 \text{ }^\circ\text{C}$  steps for 45-minute isothermal runs). Data is calculated from changing gradients of Arrhenius plots for either the raw data (red) or from exponential (green) or power (black) fits. Average values for data points  $< 255 \text{ }^\circ\text{C}$  was  $69.9 \text{ kJ mol}^{-1}$  compared to  $66.5 \text{ kJ mol}^{-1}$  for a linear fit, while average values for  $> 255 \text{ }^\circ\text{C}$  the average value was  $130.3 \text{ kJ mol}^{-1}$  compared to  $125.4 \text{ kJ mol}^{-1}$  for a linear fit.

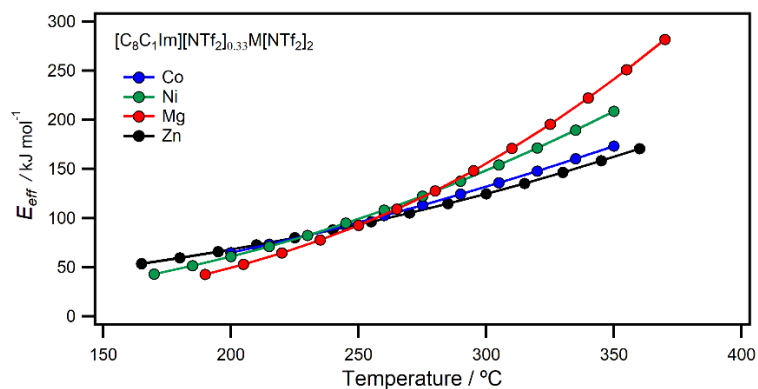

**Figure S116** Effective activation energies as a function of temperature from exponential fits of Arrhenius plots for  $[\text{C}_8\text{C}_1\text{Im}][\text{NTf}_2]_{0.33}\text{M}[\text{NTf}_2]_2$  where M = Co (blue), Ni (green), Mg (red), and Zn (black).

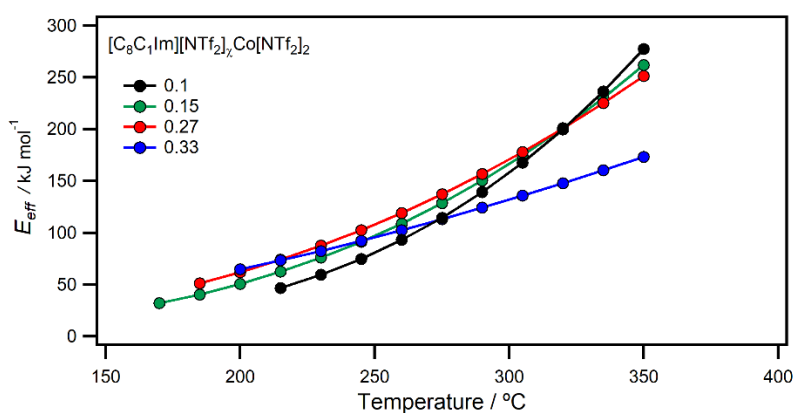

**Figure S117** Effective activation energies as a function of temperature from exponential fits of Arrhenius plots for  $[\text{C}_8\text{C}_1\text{Im}][\text{NTf}_2]_x\text{Co}[\text{NTf}_2]_2$  for variable mole fractions of metal.

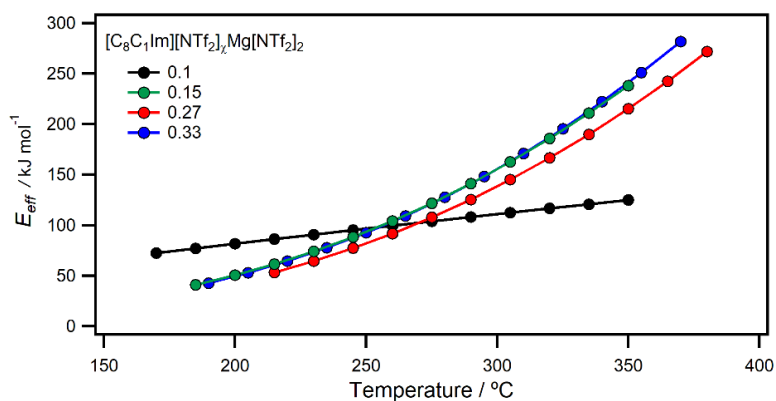

**Figure S118** Effective activation energies as a function of temperature from exponential fits of Arrhenius plots for  $[\text{C}_8\text{C}_1\text{Im}][\text{NTf}_2]_x\text{Mg}[\text{NTf}_2]_2$  for variable mole fractions of metal.

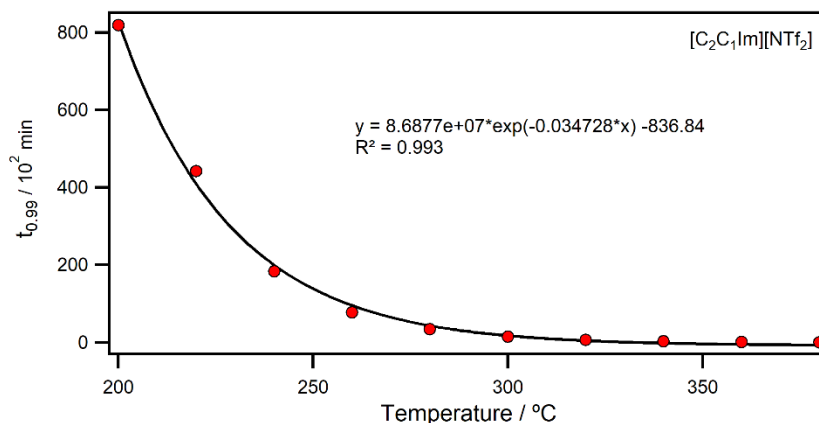

**Figure S119** Plot of  $t_{0.99}$  versus temperature to calculate the parameter  $T_{0.01/10}$  (the temperature at which 1% mass loss occurs over 10 hours of isothermal heating) for  $[C_2C_1Im][NTf_2]$ .

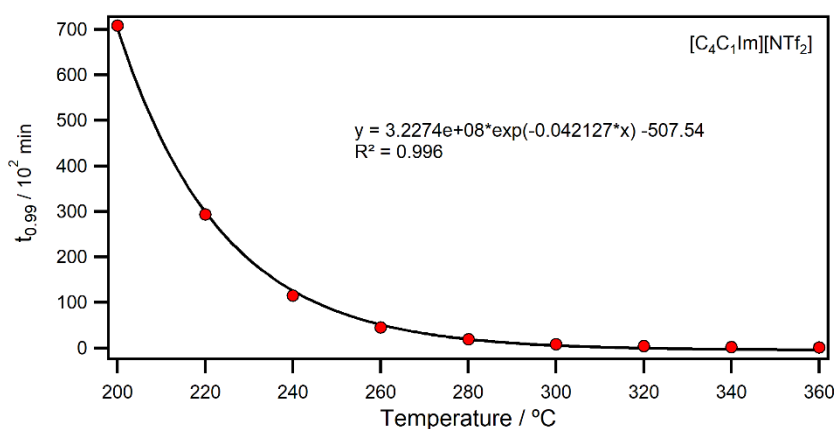

**Figure S120** Plot of  $t_{0.99}$  versus temperature to calculate the parameter  $T_{0.01/10}$  (the temperature at which 1% mass loss occurs over 10 hours of isothermal heating) for  $[C_4C_1Im][NTf_2]$ .

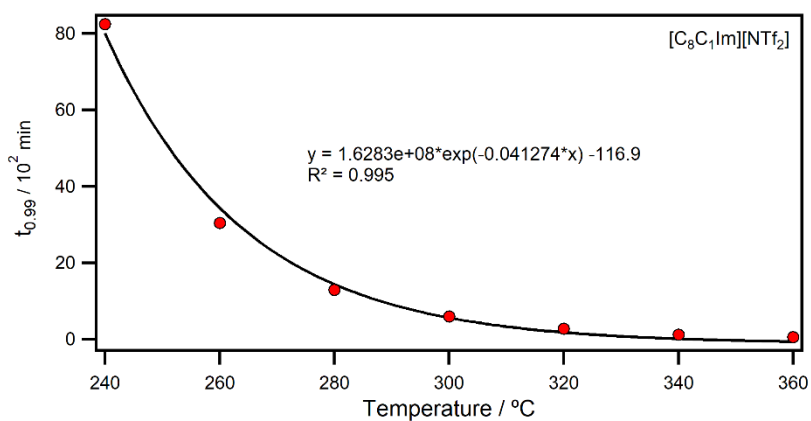

**Figure S121** Plot of  $t_{0.99}$  versus temperature to calculate the parameter  $T_{0.01/10}$  (the temperature at which 1% mass loss occurs over 10 hours of isothermal heating) for  $[C_8C_1Im][NTf_2]$ .

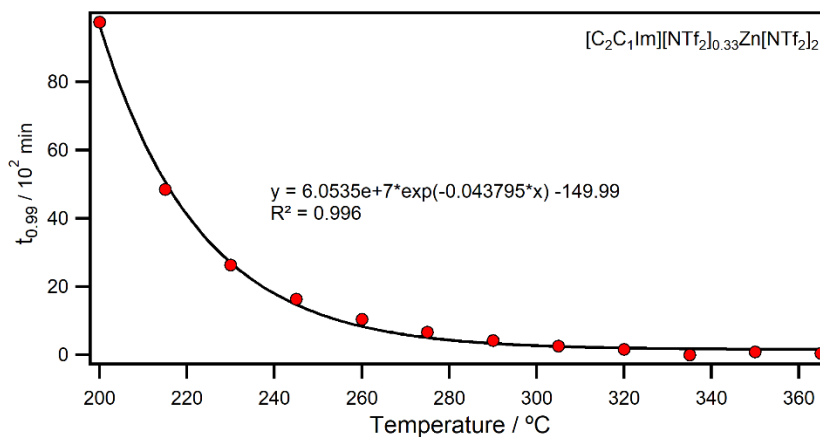

**Figure S122** Plot of  $t_{0.99}$  versus temperature to calculate the parameter  $T_{0.01/10}$  (the temperature at which 1% mass loss occurs over 10 hours of isothermal heating) for  $[C_2C_1Im][NTf_2]_{0.33}Zn[NTf_2]_2$ .

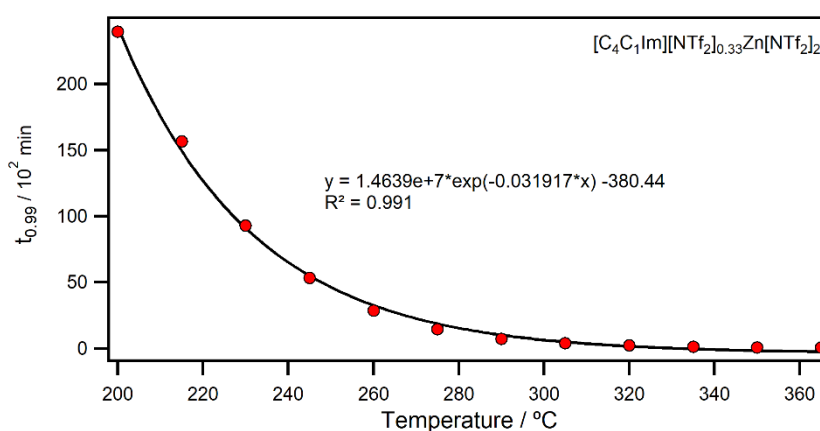

**Figure S123** Plot of  $t_{0.99}$  versus temperature to calculate the parameter  $T_{0.01/10}$  (the temperature at which 1% mass loss occurs over 10 hours of isothermal heating) for  $[C_4C_1Im][NTf_2]_{0.33}Zn[NTf_2]_2$ .

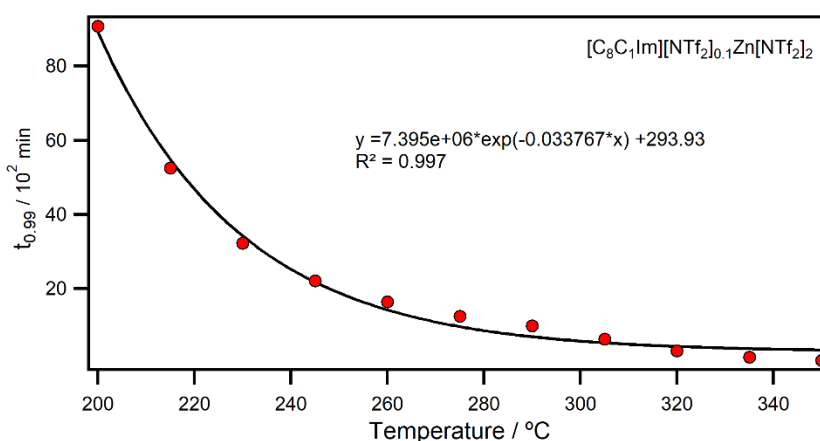

**Figure S124** Plot of  $t_{0.99}$  versus temperature to calculate the parameter  $T_{0.01/10}$  (the temperature at which 1% mass loss occurs over 10 hours of isothermal heating) for  $[C_8C_1Im][NTf_2]_{0.1}Zn[NTf_2]_2$ .

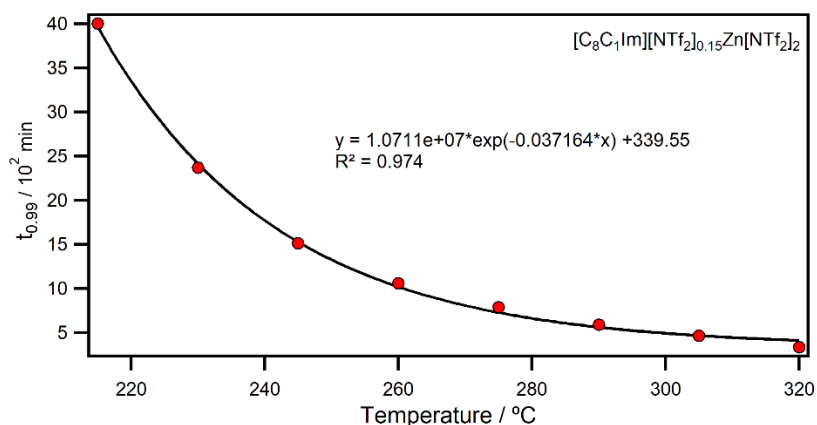

**Figure S125** Plot of  $t_{0.99}$  versus temperature to calculate the parameter  $T_{0.01/10}$  (the temperature at which 1% mass loss occurs over 10 hours of isothermal heating) for  $[\text{C}_8\text{C}_1\text{Im}][\text{NTf}_2]_{0.15}\text{Zn}[\text{NTf}_2]_2$ .

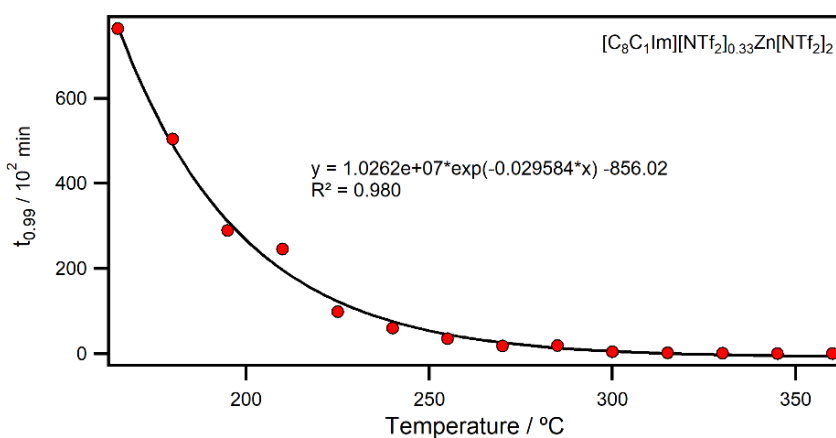

**Figure S126** Plot of  $t_{0.99}$  versus temperature to calculate the parameter  $T_{0.01/10}$  (the temperature at which 1% mass loss occurs over 10 hours of isothermal heating) for  $[\text{C}_8\text{C}_1\text{Im}][\text{NTf}_2]_{0.33}\text{Zn}[\text{NTf}_2]_2$ .

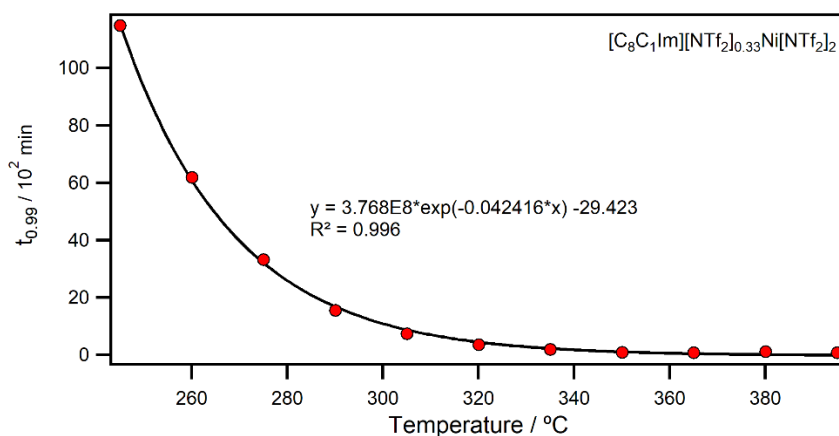

**Figure S127** Plot of  $t_{0.99}$  versus temperature to calculate the parameter  $T_{0.01/10}$  (the temperature at which 1% mass loss occurs over 10 hours of isothermal heating) for  $[\text{C}_8\text{C}_1\text{Im}][\text{NTf}_2]_{0.33}\text{Ni}[\text{NTf}_2]_2$ .

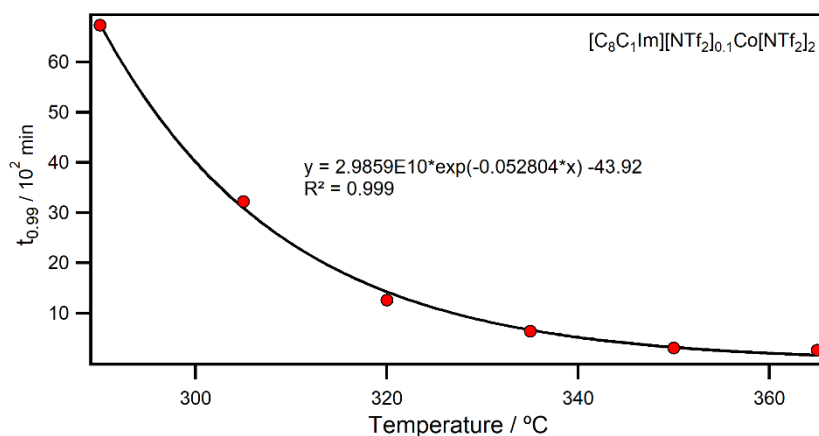

**Figure S128** Plot of  $t_{0.99}$  versus temperature to calculate the parameter  $T_{0.01/10}$  (the temperature at which 1% mass loss occurs over 10 hours of isothermal heating) for  $[\text{C}_8\text{C}_1\text{Im}][\text{NTf}_2]_{0.1}\text{Co}[\text{NTf}_2]_2$ .

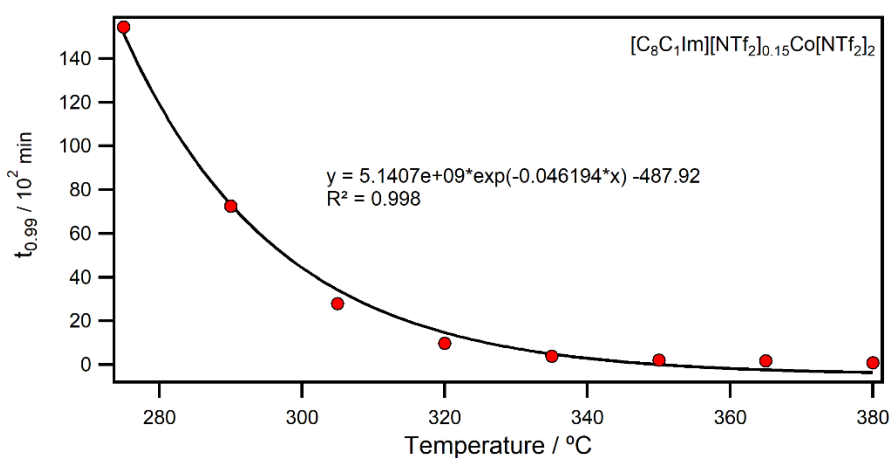

**Figure S129** Plot of  $t_{0.99}$  versus temperature to calculate the parameter  $T_{0.01/10}$  (the temperature at which 1% mass loss occurs over 10 hours of isothermal heating) for  $[\text{C}_8\text{C}_1\text{Im}][\text{NTf}_2]_{0.15}\text{Co}[\text{NTf}_2]_2$ .

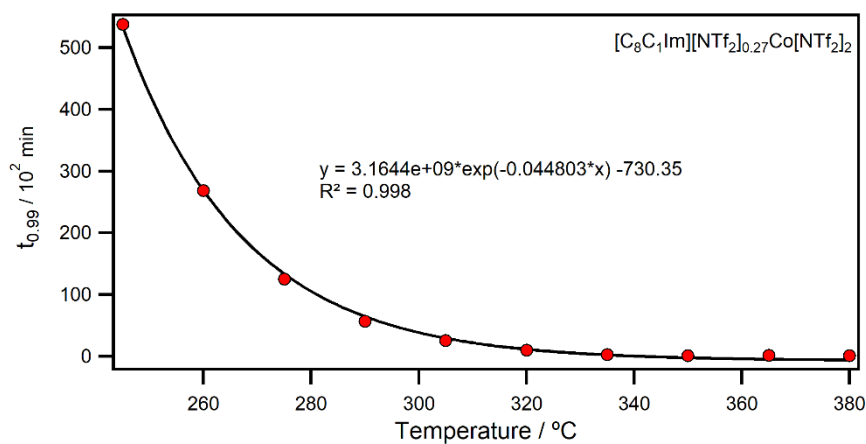

**Figure S130** Plot of  $t_{0.99}$  versus temperature to calculate the parameter  $T_{0.01/10}$  (the temperature at which 1% mass loss occurs over 10 hours of isothermal heating) for  $[\text{C}_8\text{C}_1\text{Im}][\text{NTf}_2]_{0.27}\text{Co}[\text{NTf}_2]_2$ .

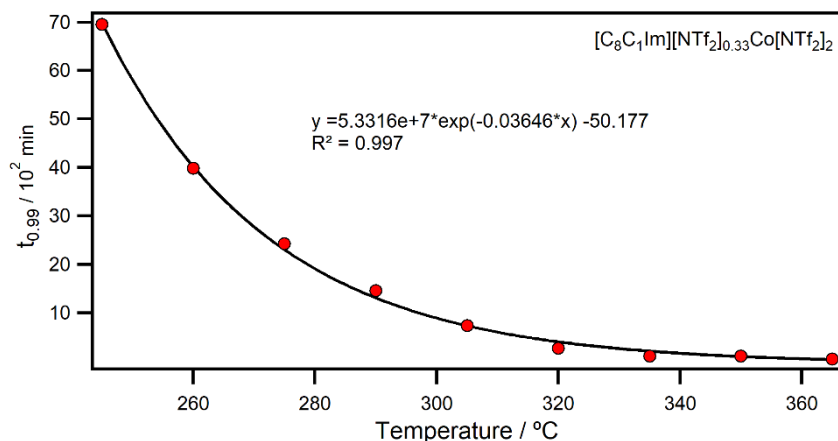

**Figure S131** Plot of  $t_{0.99}$  versus temperature to calculate the parameter  $T_{0.01/10}$  (the temperature at which 1% mass loss occurs over 10 hours of isothermal heating) for  $[C_8C_1Im][NTf_2]_{0.33}Co[NTf_2]_2$ .

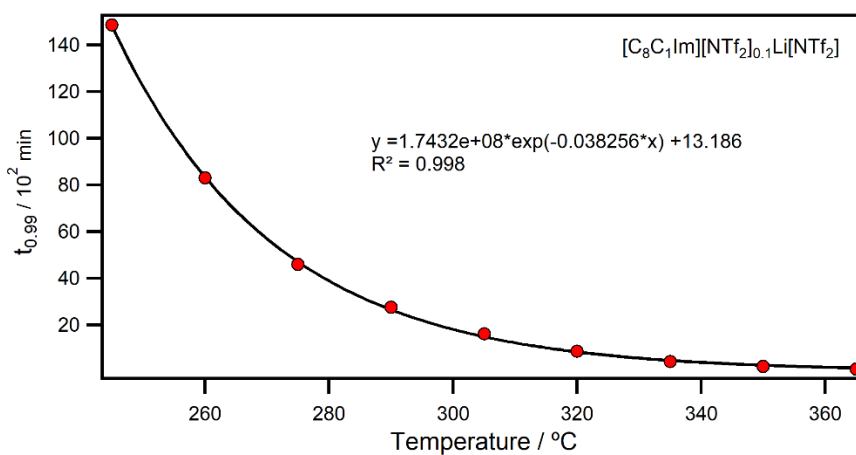

**Figure S132** Plot of  $t_{0.99}$  versus temperature to calculate the parameter  $T_{0.01/10}$  (the temperature at which 1% mass loss occurs over 10 hours of isothermal heating) for  $[C_8C_1Im][NTf_2]_{0.1}Li[NTf_2]$ .

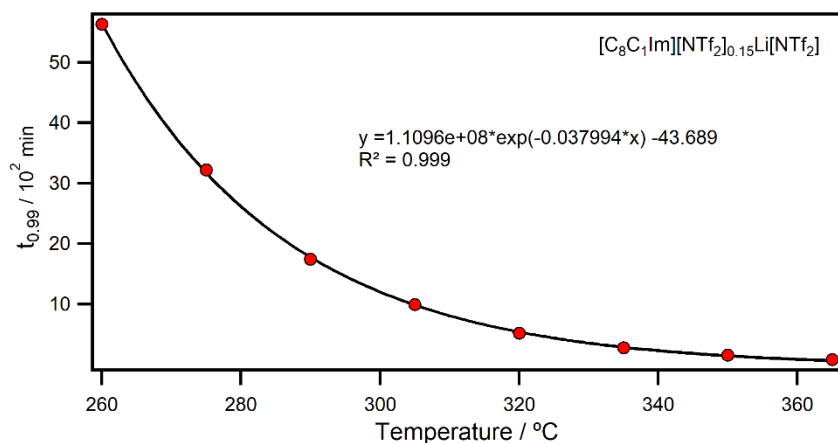

**Figure S133** Plot of  $t_{0.99}$  versus temperature to calculate the parameter  $T_{0.01/10}$  (the temperature at which 1% mass loss occurs over 10 hours of isothermal heating) for  $[C_8C_1Im][NTf_2]_{0.15}Li[NTf_2]$ .

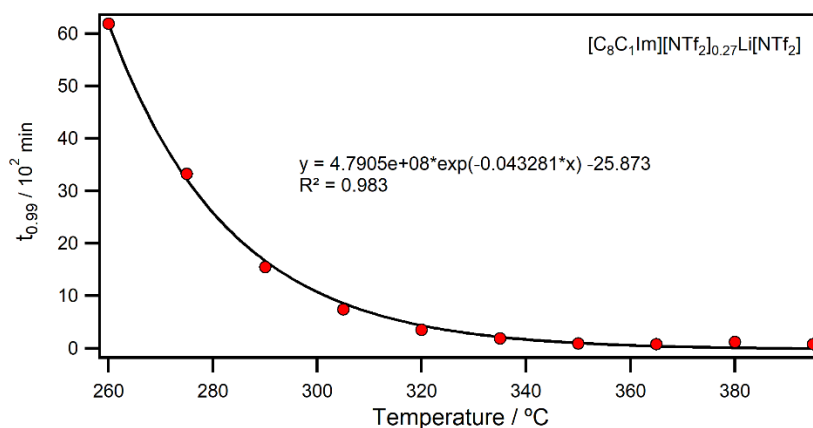

**Figure S134** Plot of  $t_{0.99}$  versus temperature to calculate the parameter  $T_{0.01/10}$  (the temperature at which 1% mass loss occurs over 10 hours of isothermal heating) for  $[C_8C_1Im][NTf_2]_{0.27}Li[NTf_2]$ .

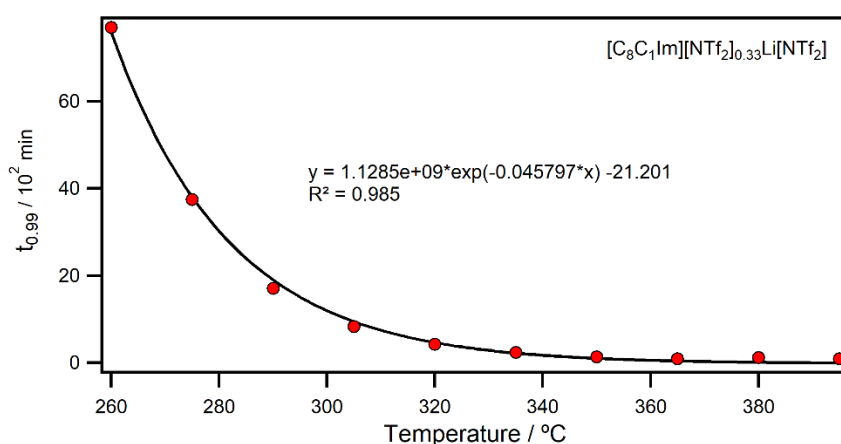

**Figure S135** Plot of  $t_{0.99}$  versus temperature to calculate the parameter  $T_{0.01/10}$  (the temperature at which 1% mass loss occurs over 10 hours of isothermal heating) for  $[C_8C_1Im][NTf_2]_{0.33}Li[NTf_2]$ .

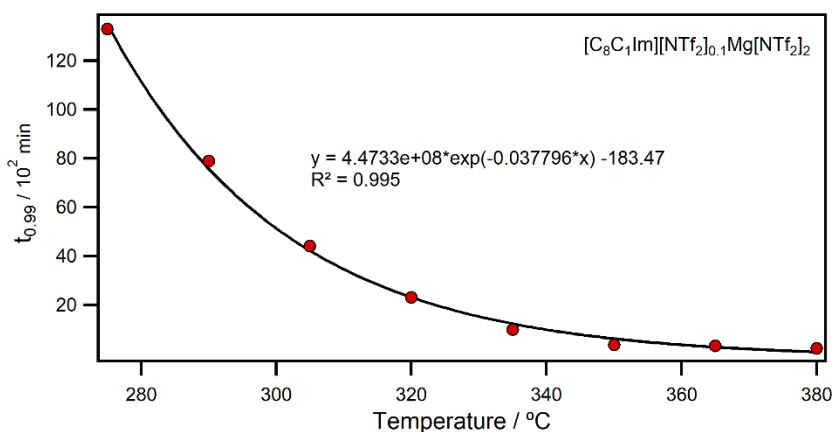

**Figure S136** Plot of  $t_{0.99}$  versus temperature to calculate the parameter  $T_{0.01/10}$  (the temperature at which 1% mass loss occurs over 10 hours of isothermal heating) for  $[C_8C_1Im][NTf_2]_{0.1}Mg[NTf_2]_2$ .



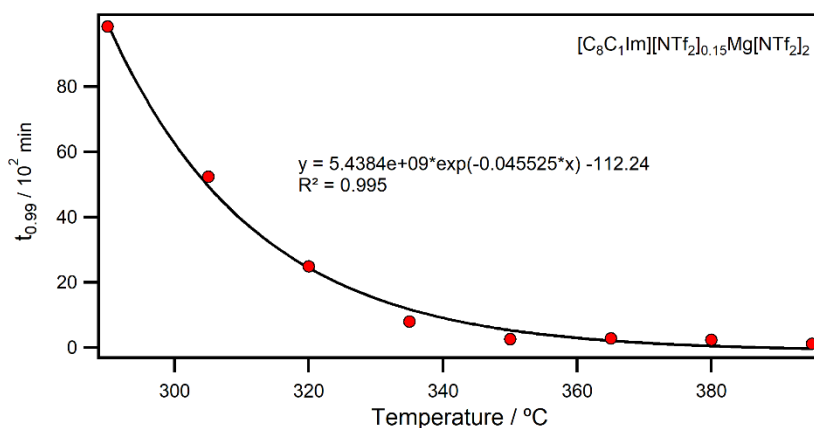

**Figure S137** Plot of  $t_{0.99}$  versus temperature to calculate the parameter  $T_{0.01/10}$  (the temperature at which 1% mass loss occurs over 10 hours of isothermal heating) for  $[C_8C_1Im][NTf_2]_{0.15}Mg[NTf_2]_2$ .

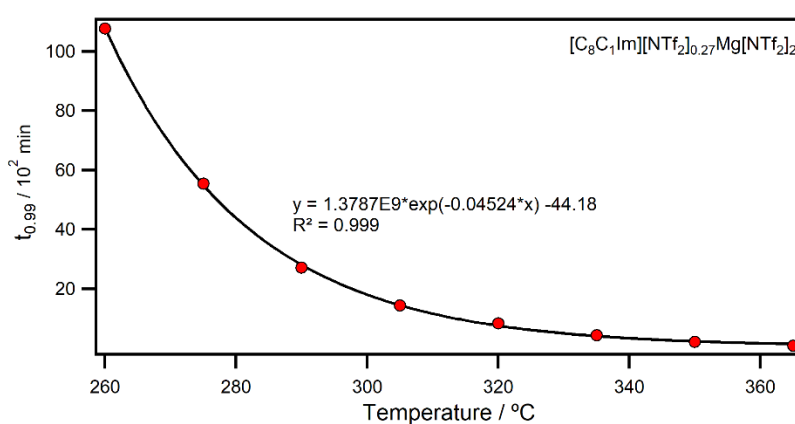

**Figure S138** Plot of  $t_{0.99}$  versus temperature to calculate the parameter  $T_{0.01/10}$  (the temperature at which 1% mass loss occurs over 10 hours of isothermal heating) for  $[C_8C_1Im][NTf_2]_{0.27}Mg[NTf_2]_2$ .

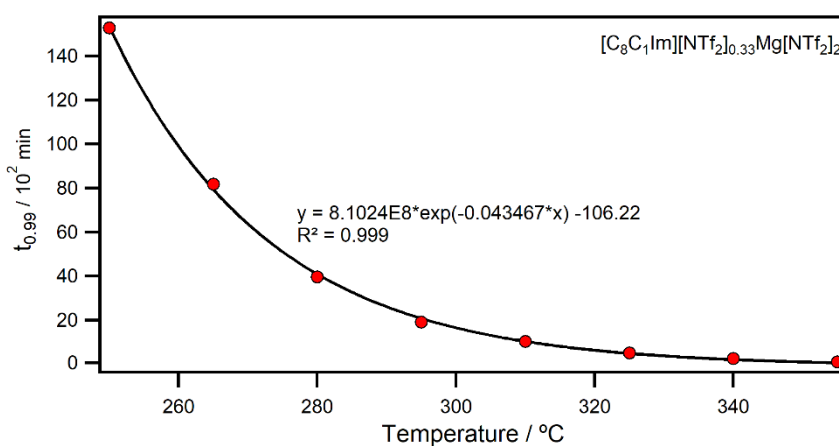

**Figure S139** Plot of  $t_{0.99}$  versus temperature to calculate the parameter  $T_{0.01/10}$  (the temperature at which 1% mass loss occurs over 10 hours of isothermal heating) for  $[C_8C_1Im][NTf_2]_{0.33}Mg[NTf_2]_2$ .

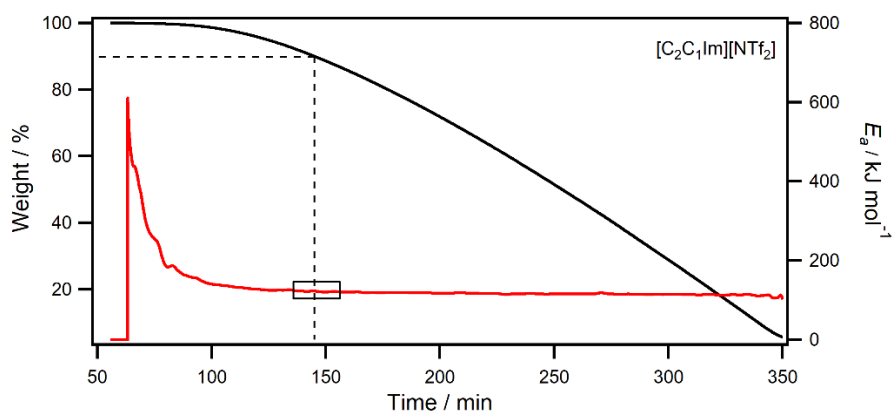

**Figure S140** MTGA data for  $[C_2C_1Im][NTf_2]$  under Hi-Res ramping (sensitivity = 1, resolution = 6) at  $2\text{ }^\circ\text{C min}^{-1}$  with a modulation temperature amplitude of  $5\text{ }^\circ\text{C}$  and a period of 200s. Activation energies taken at 10 wt% mass loss over a 20 minute window to ensure a minimum of 5 modulation periods.

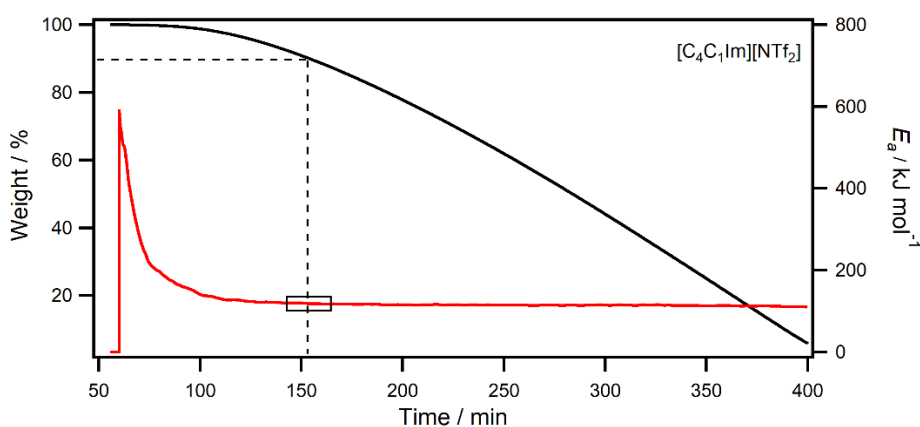

**Figure S141** MTGA data for  $[C_4C_1Im][NTf_2]$  under Hi-Res ramping (sensitivity = 1, resolution = 6) at  $2\text{ }^\circ\text{C min}^{-1}$  with a modulation temperature amplitude of  $5\text{ }^\circ\text{C}$  and a period of 200s. Activation energies taken at 10 wt% mass loss over a 20 minute window to ensure a minimum of 5 modulation periods.

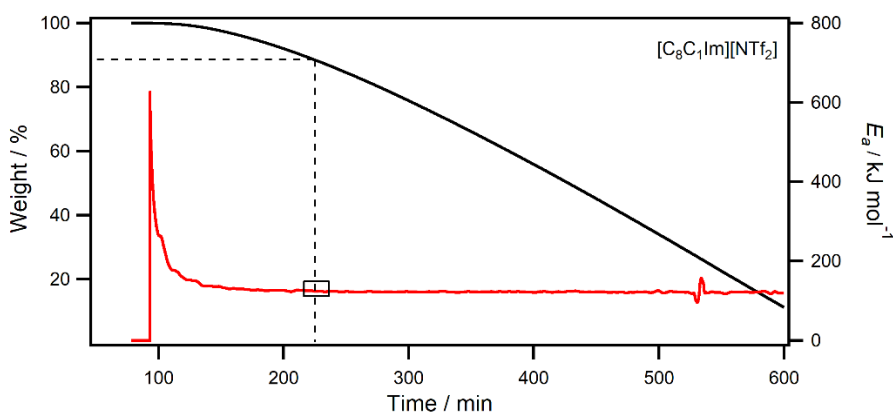

**Figure S142** MTGA data for  $[C_8C_1Im][NTf_2]$  under Hi-Res ramping (sensitivity = 1, resolution = 6) at  $2\text{ }^\circ\text{C min}^{-1}$  with a modulation temperature amplitude of  $5\text{ }^\circ\text{C}$  and a period of 200s. Activation energies taken at 10 wt% mass loss over a 20 minute window to ensure a minimum of 5 modulation periods.

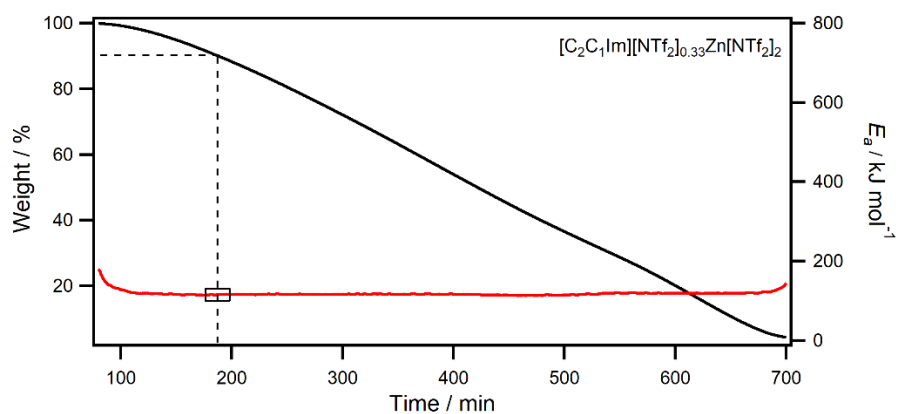

**Figure S143** MTGA data for  $[C_2C_1Im][NTf_2]_{0.33}Zn[NTf_2]_2$  under Hi-Res ramping (sensitivity = 1, resolution = 6) at  $2\text{ }^\circ\text{C min}^{-1}$  with a modulation temperature amplitude of  $5\text{ }^\circ\text{C}$  and a period of 200s. Activation energies taken at 10 wt% mass loss over a 20 minute window to ensure a minimum of 5 modulation periods.

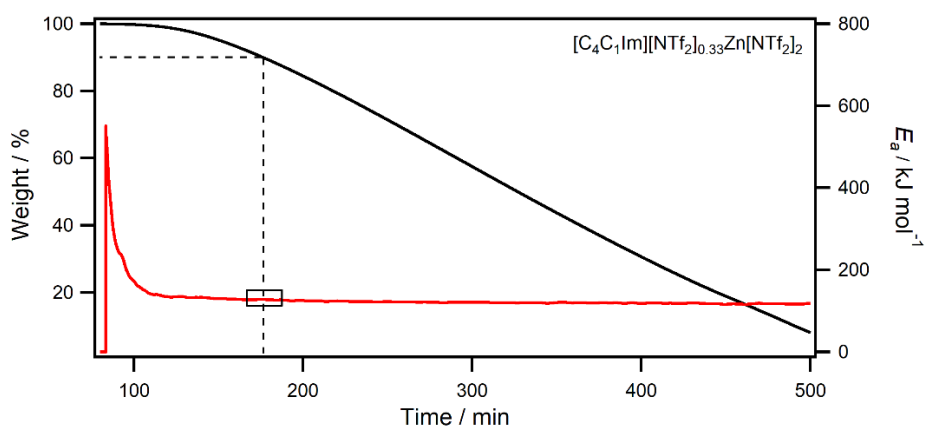

**Figure S144** MTGA data for  $[C_4C_1Im][NTf_2]_{0.33}Zn[NTf_2]_2$  under Hi-Res ramping (sensitivity = 1, resolution = 6) at  $2\text{ }^\circ\text{C min}^{-1}$  with a modulation temperature amplitude of  $5\text{ }^\circ\text{C}$  and a period of 200s. Activation energies taken at 10 wt% mass loss over a 20 minute window to ensure a minimum of 5 modulation periods.

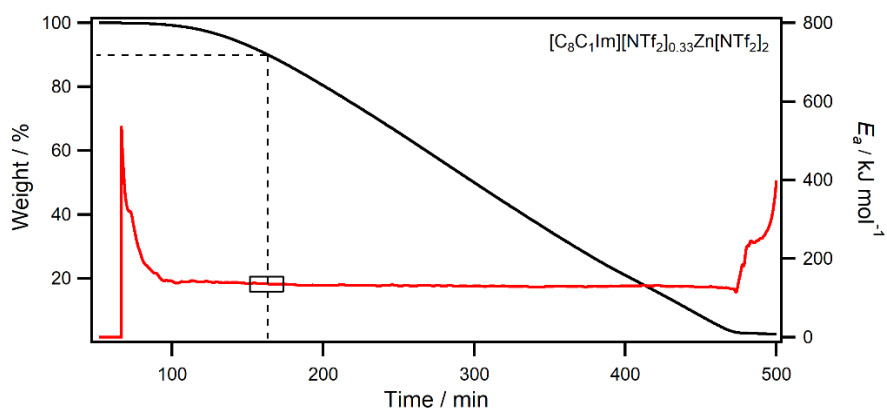

**Figure S145** MTGA data for  $[C_8C_1Im][NTf_2]_{0.33}Zn[NTf_2]_2$  under Hi-Res ramping (sensitivity = 1, resolution = 6) at  $2\text{ }^\circ\text{C min}^{-1}$  with a modulation temperature amplitude of  $5\text{ }^\circ\text{C}$  and a period of 200s. Activation energies taken at 10 wt% mass loss over a 20 minute window to ensure a minimum of 5 modulation periods.

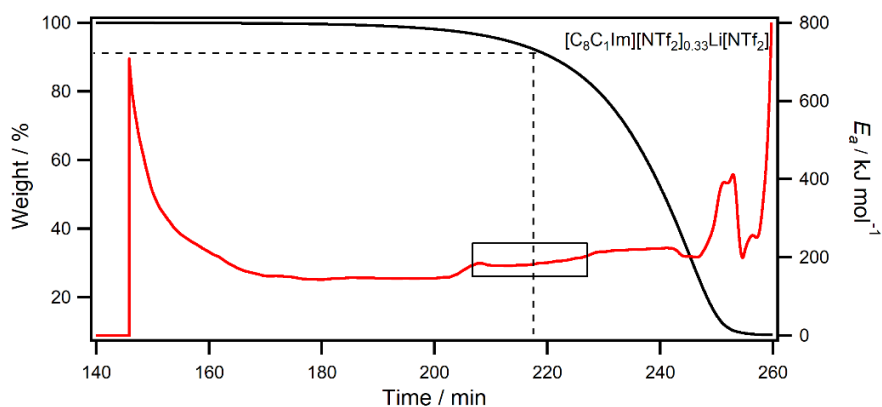

**Figure S146** MTGA data for  $[\text{C}_8\text{C}_1\text{Im}][\text{NTf}_2]_{0.33}\text{Li}[\text{NTf}_2]$  under Hi-Res ramping (sensitivity = 1, resolution = 6) at  $2\text{ }^\circ\text{C min}^{-1}$  with a modulation temperature amplitude of  $5\text{ }^\circ\text{C}$  and a period of 200s. Activation energies taken at 10 wt% mass loss over a 20 minute window to ensure a minimum of 5 modulation periods.

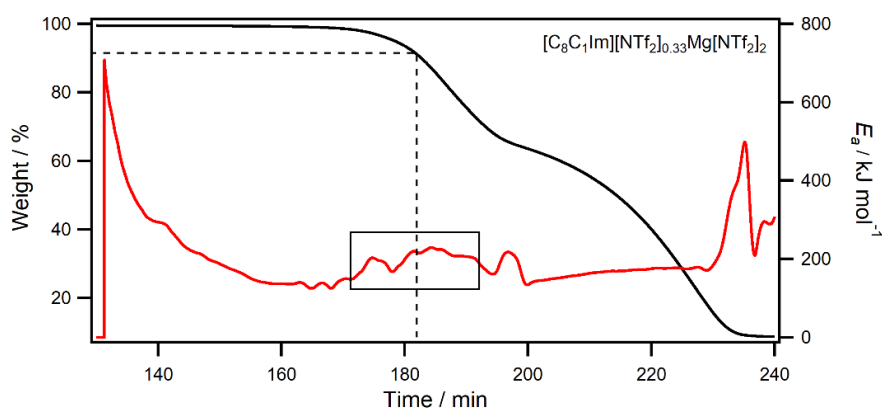

**Figure S147** MTGA data for  $[\text{C}_8\text{C}_1\text{Im}][\text{NTf}_2]_{0.33}\text{Mg}[\text{NTf}_2]_2$  under Hi-Res ramping (sensitivity = 1, resolution = 6) at  $2\text{ }^\circ\text{C min}^{-1}$  with a modulation temperature amplitude of  $5\text{ }^\circ\text{C}$  and a period of 200s. Activation energies taken at 10 wt% mass loss over a 20 minute window to ensure a minimum of 5 modulation periods.

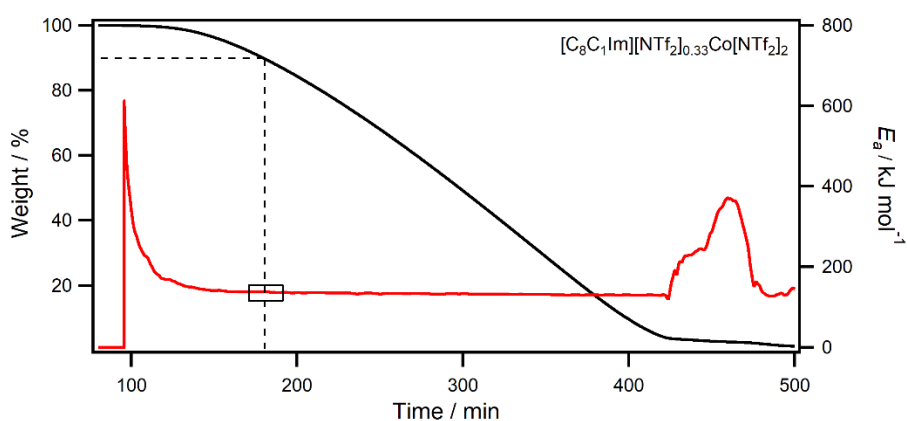

**Figure S148** MTGA data for  $[\text{C}_8\text{C}_1\text{Im}][\text{NTf}_2]_{0.33}\text{Co}[\text{NTf}_2]_2$  under Hi-Res ramping (sensitivity = 1, resolution = 6) at  $2\text{ }^\circ\text{C min}^{-1}$  with a modulation temperature amplitude of  $5\text{ }^\circ\text{C}$  and a period of 200s. Activation energies taken at 10 wt% mass loss over a 20 minute window to ensure a minimum of 5 modulation periods.

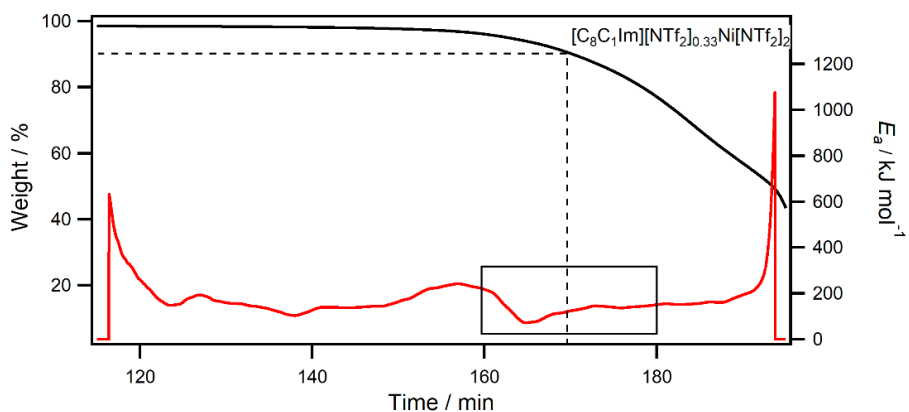

**Figure S149** MTGA data for  $[\text{C}_8\text{C}_1\text{Im}][\text{NTf}_2]_{0.33}\text{Ni}[\text{NTf}_2]_2$  under Hi-Res ramping (sensitivity = 1, resolution = 6) at  $2\text{ }^\circ\text{C min}^{-1}$  with a modulation temperature amplitude of  $5\text{ }^\circ\text{C}$  and a period of 200s. Activation energies taken at 10 wt% mass loss over a 20 minute window to ensure a minimum of 5 modulation periods.

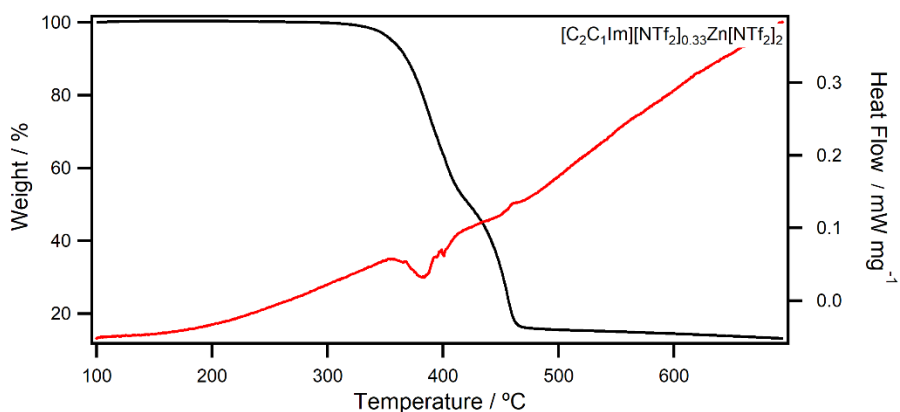

**Figure S150** STA data showing mass loss (left axis) and corresponding DSC signals (right axis) for  $[\text{C}_2\text{C}_1\text{Im}][\text{NTf}_2]_{0.33}\text{Zn}[\text{NTf}_2]_2$  in  $50\text{ mL min}^{-1}\text{ N}_2$  at  $10\text{ }^\circ\text{C min}^{-1}$ .

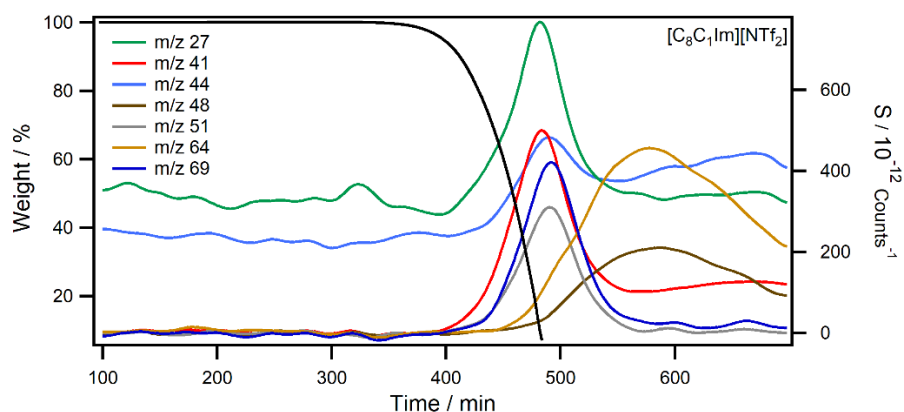

**Figure S151** TGA-MS data showing mass loss (left axis) and corresponding MS signals (right axis) for  $[\text{C}_8\text{C}_1\text{Im}][\text{NTf}_2]$  in  $50\text{ mL min}^{-1}\text{ N}_2$  at  $10\text{ }^\circ\text{C min}^{-1}$ .

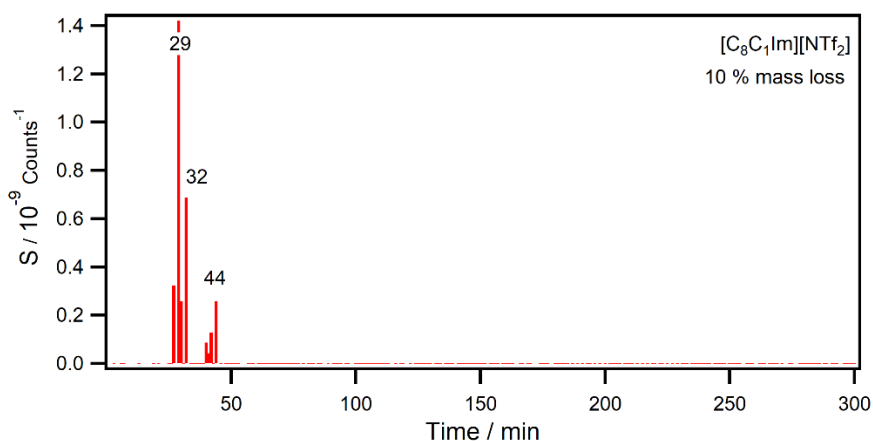

**Figure S152** EI-MS mass spectrum from TGA-MS experiments of  $[\text{C}_8\text{C}_1\text{Im}][\text{NTf}_2]$  in  $50 \text{ mL min}^{-1} \text{ N}_2$  at  $10 \text{ }^\circ\text{C min}^{-1}$  at 10% mass loss.

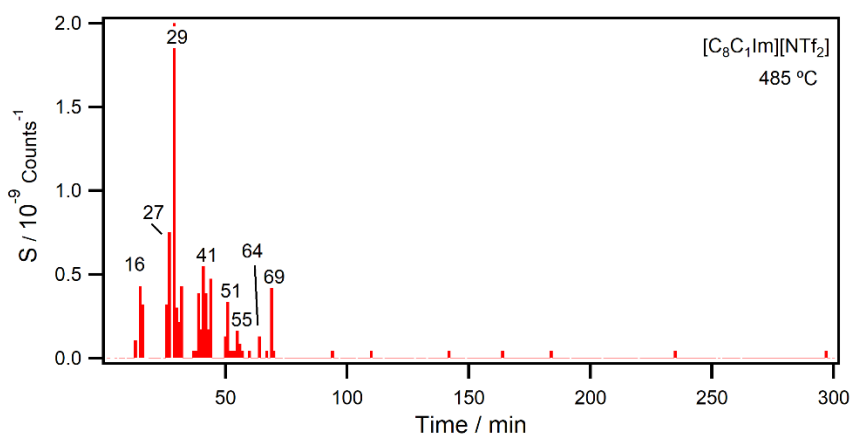

**Figure S153** EI-MS mass spectrum from TGA-MS experiments of  $[\text{C}_8\text{C}_1\text{Im}][\text{NTf}_2]$  in  $50 \text{ mL min}^{-1} \text{ N}_2$  at  $10 \text{ }^\circ\text{C min}^{-1}$  at  $485 \text{ }^\circ\text{C}$ .

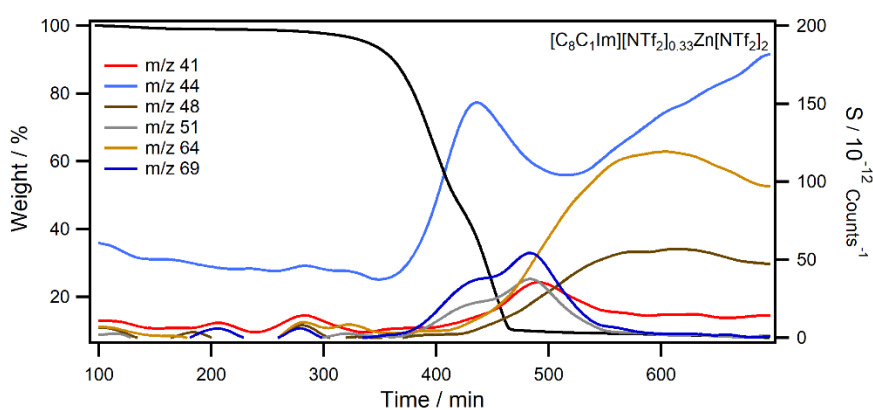

**Figure S154** TGA-MS data showing mass loss (left axis) and corresponding MS signals (right axis) for  $[\text{C}_8\text{C}_1\text{Im}][\text{NTf}_2]_{0.33}\text{Zn}[\text{NTf}_2]_2$  in  $50 \text{ mL min}^{-1} \text{ N}_2$  at  $10 \text{ }^\circ\text{C min}^{-1}$ .

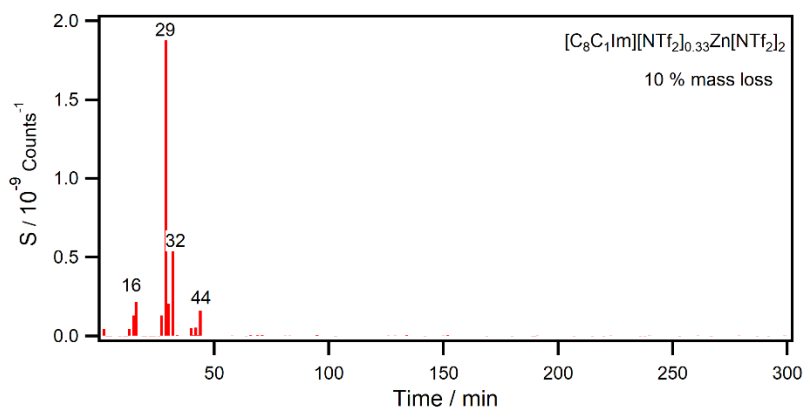

**Figure S155** EI-MS mass spectrum from TGA-MS experiments of  $[\text{C}_8\text{C}_1\text{Im}][\text{NTf}_2]_{0.33}\text{Zn}[\text{NTf}_2]_2$  in  $50 \text{ mL min}^{-1} \text{ N}_2$  at  $10 \text{ }^\circ\text{C min}^{-1}$  at 10% mass loss.

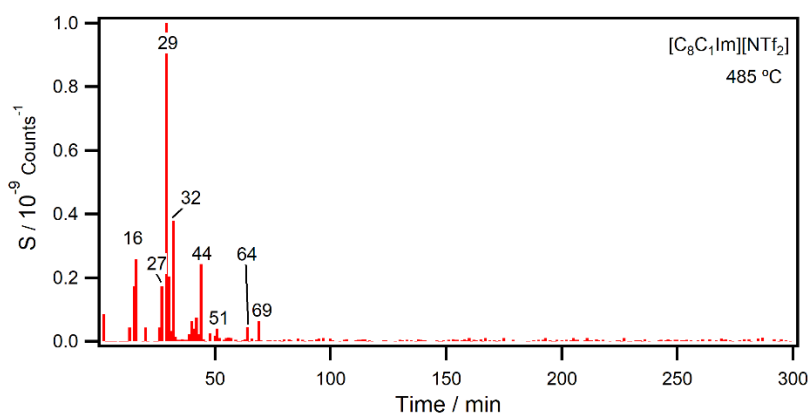

**Figure S156** EI-MS mass spectrum from TGA-MS experiments of  $[\text{C}_8\text{C}_1\text{Im}][\text{NTf}_2]_{0.33}\text{Zn}[\text{NTf}_2]_2$  in  $50 \text{ mL min}^{-1} \text{ N}_2$  at  $10 \text{ }^\circ\text{C min}^{-1}$  at  $485 \text{ }^\circ\text{C}$ .

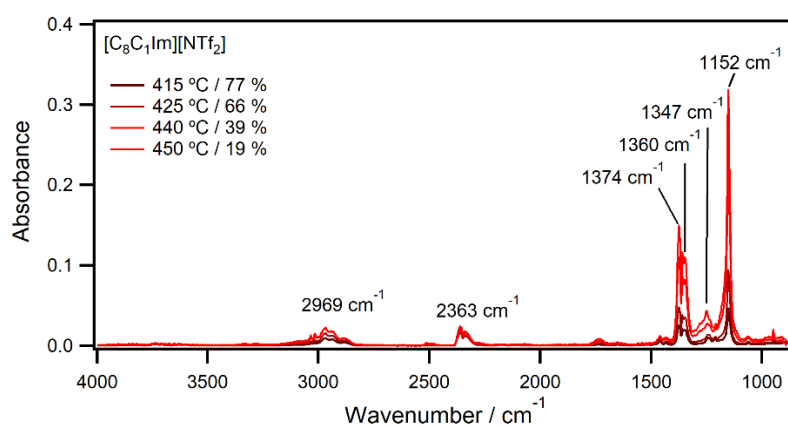

**Figure S157** TGA-IR IR spectra for  $[\text{C}_8\text{C}_1\text{Im}][\text{NTf}_2]$  in  $50 \text{ mL min}^{-1} \text{ N}_2$  at  $10 \text{ }^\circ\text{C min}^{-1}$ .

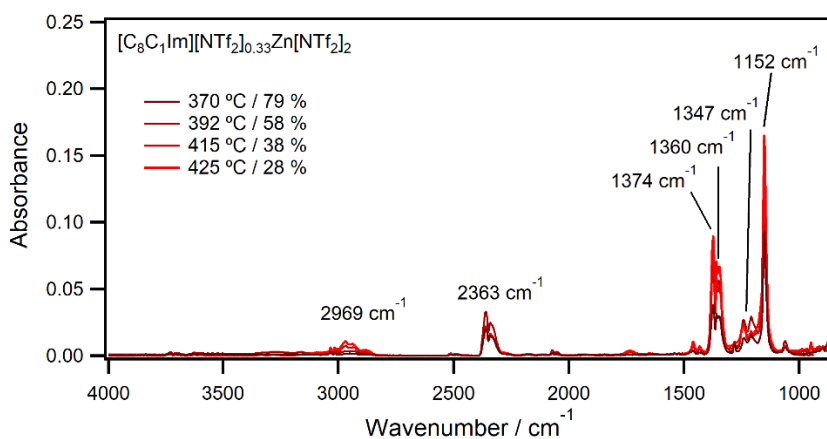

**Figure S158** TGA-IR IR spectra for  $[\text{C}_8\text{C}_1\text{Im}][\text{NTf}_2]_{0.33}\text{Zn}[\text{NTf}_2]_2$  in  $50 \text{ mL min}^{-1} \text{ N}_2$  at  $10 \text{ }^\circ\text{C min}^{-1}$ .

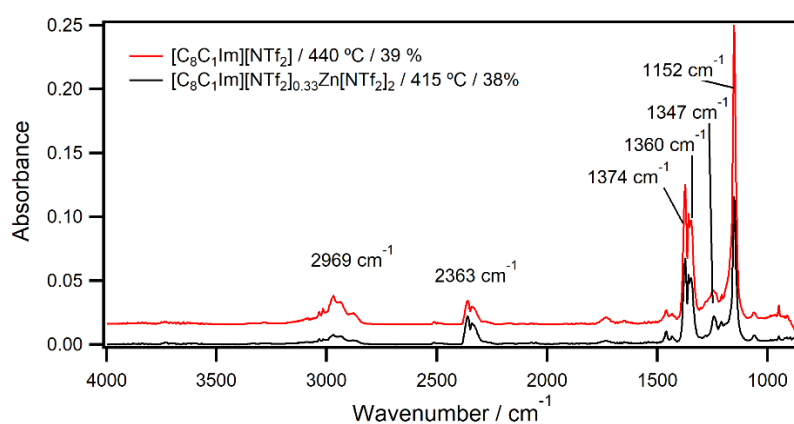

**Figure S159** Comparison of TGA-IR IR spectra for  $[\text{C}_8\text{C}_1\text{Im}][\text{NTf}_2]$  (red) and  $[\text{C}_8\text{C}_1\text{Im}][\text{NTf}_2]_{0.33}\text{Zn}[\text{NTf}_2]_2$  (black) at approximately 40% remaining mass in  $50 \text{ mL min}^{-1} \text{ N}_2$  at  $10 \text{ }^\circ\text{C min}^{-1}$ .



## Thermal Desorption Data

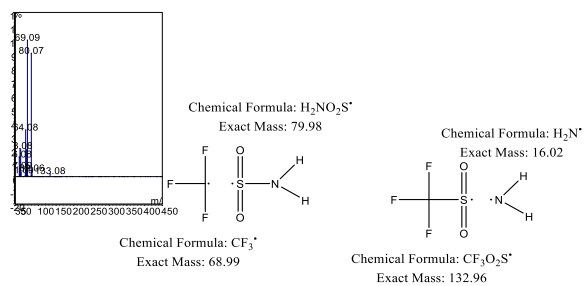

**Figure S160** Mass spectrum (EI) from TD-GC-MS experiments at 14.53 minutes retention time with peak assignments.

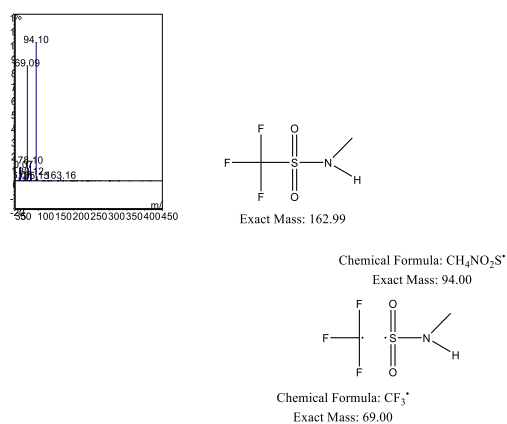

**Figure S161** Mass spectrum (EI) from TD-GC-MS experiments at 13.23 minutes retention time with peak assignments.

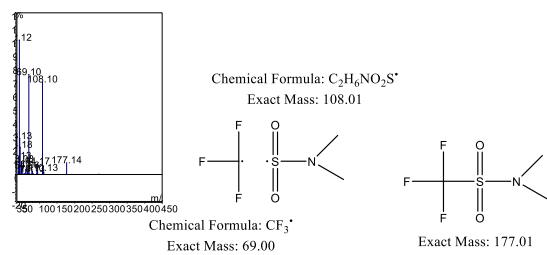

**Figure S163** Mass spectrum (EI) from TD-GC-MS experiments at 10.52 minutes retention time with peak assignments.

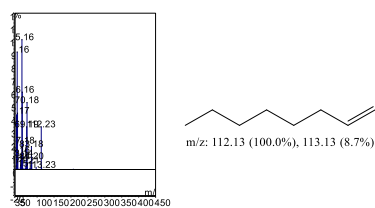

**Figure S162** Mass spectrum (EI) from TD-GC-MS experiments at 10.00 minutes retention time with peak assignments.



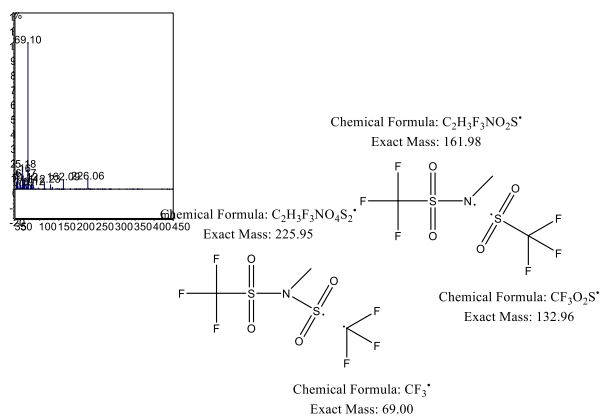

**Figure S165** Mass spectrum (EI) from TD-GC-MS experiments at 9.78 minutes retention time with peak assignments.

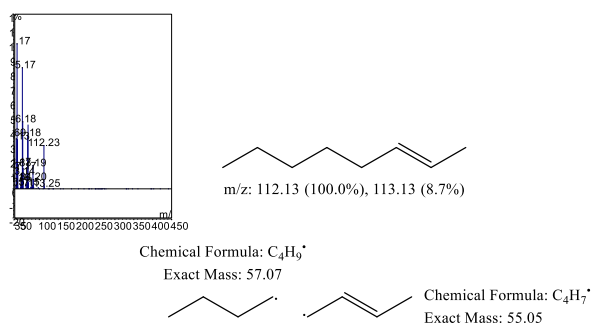

**Figure S164** Mass spectrum (EI) from TD-GC-MS experiments at 9.65 minutes retention time with peak assignments.

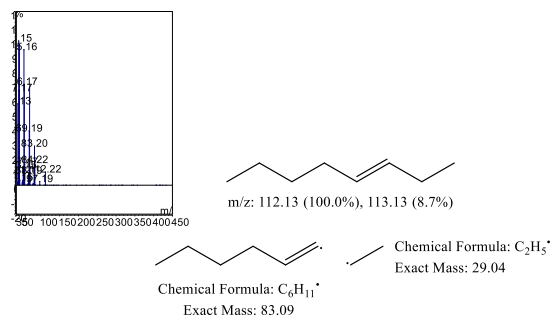

**Figure S167** Mass spectrum (EI) from TD-GC-MS experiments at 9.65 minutes retention time with peak assignments.

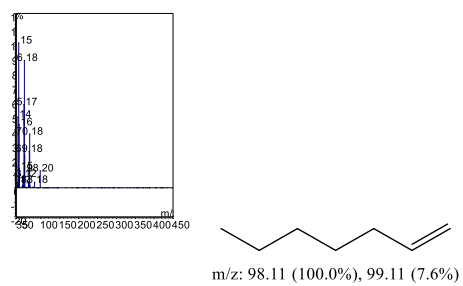

**Figure S166** Mass spectrum (EI) from TD-GC-MS experiments at 7.80 minutes retention time with peak assignments.

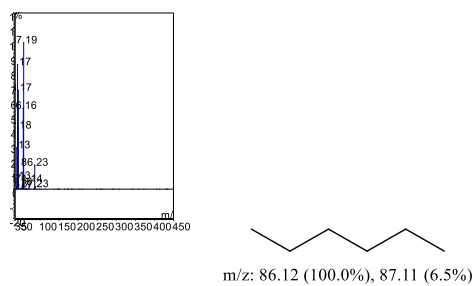

**Figure S169** Mass spectrum (EI) from TD-GC-MS experiments at 6.02 minutes retention time with peak assignments.

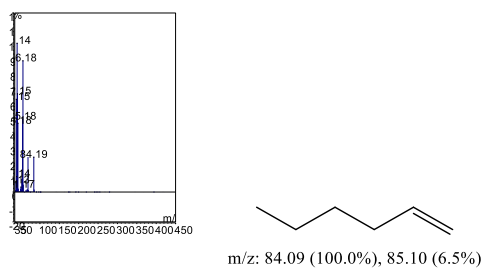

**Figure S168** Mass spectrum (EI) from TD-GC-MS experiments at 5.95 minutes retention time with peak assignments.

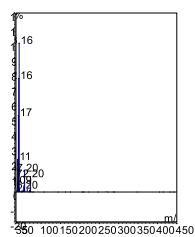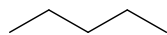

m/z: 72.09 (100.0%), 73.10 (5.4%)

**Figure S171** Mass spectrum (EI) from TD-GC-MS experiments at 4.34 minutes retention time with peak assignments.

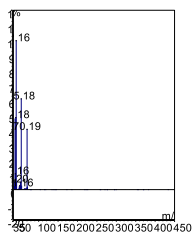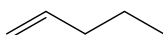

m/z: 70.08 (100.0%), 71.08 (5.4%)

**Figure S170** Mass spectrum (EI) from TD-GC-MS experiments at 4.32 minutes retention time with peak assignments.

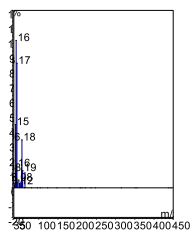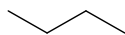

m/z: 58.08 (100.0%), 59.08 (4.3%)

**Figure S173** Mass spectrum (EI) from TD-GC-MS experiments at 3.30 minutes retention time with peak assignments.

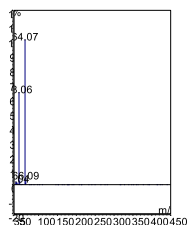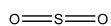

m/z: 63.96 (100.0%), 65.96 (4.5%)

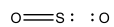

Chemical Formula: OS

Exact Mass: 47.97

Chemical Formula: O<sup>2+</sup>

Exact Mass: 15.99

**Figure S172** Mass spectrum (EI) from TD-GC-MS experiments at 3.10 minutes retention time with peak assignments.



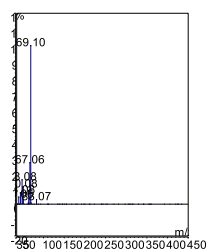

Chemical Formula:  $\text{CF}_3^+$   
Exact Mass: 69.00

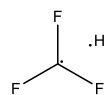

Chemical Formula:  $\text{H}^+$   
Exact Mass: 1.01

**Figure S174** Mass spectrum (EI) from TD-GC-MS experiments at 2.65 minutes retention time with peak assignments.

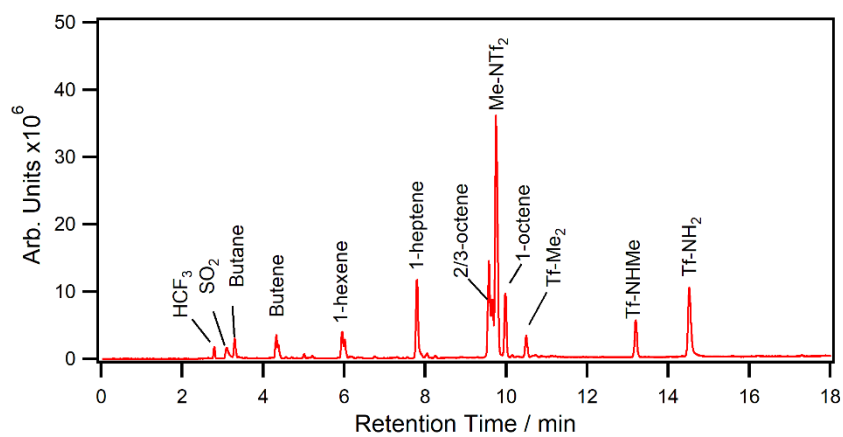

**Figure S175** Gas chromatogram from TD-GC-MS of  $[C_8C_1Im][NTf_2]_{0.33}Li[NTf_2]$ .

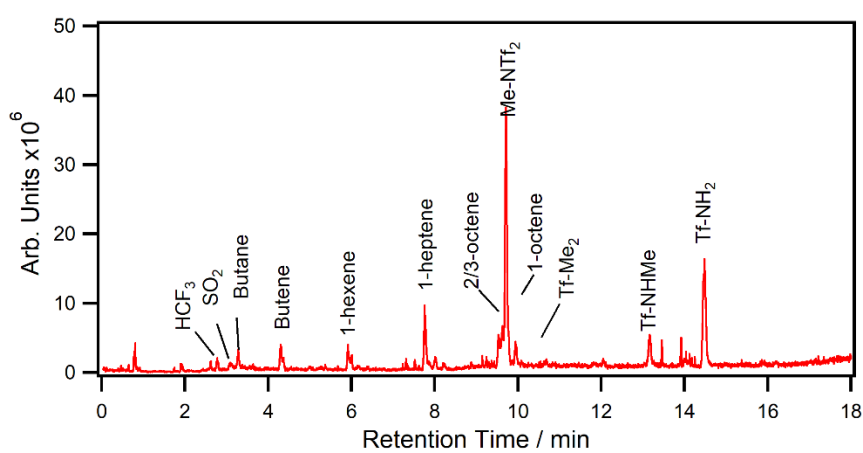

**Figure S176** Gas chromatogram from TD-GC-MS of  $[C_8C_1Im][NTf_2]_{0.33}Mg[NTf_2]_2$ .

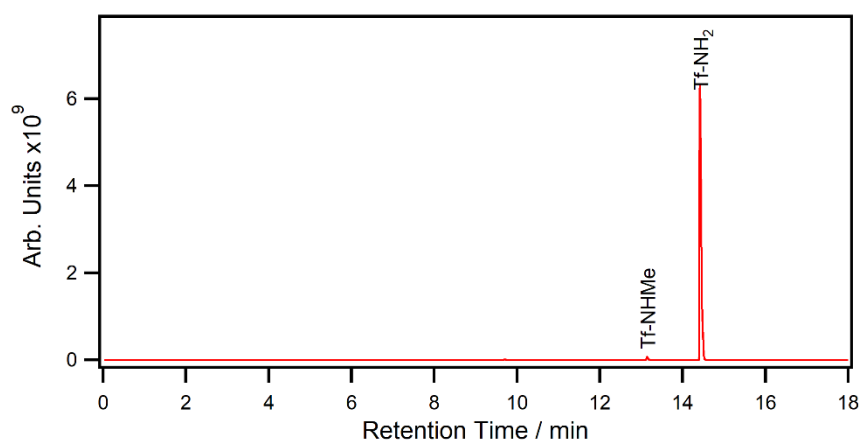

**Figure S177** Gas chromatogram from TD-GC-MS of  $[C_8C_1Im][NTf_2]_{0.33}Co[NTf_2]_2$  of 0-18 minute region.

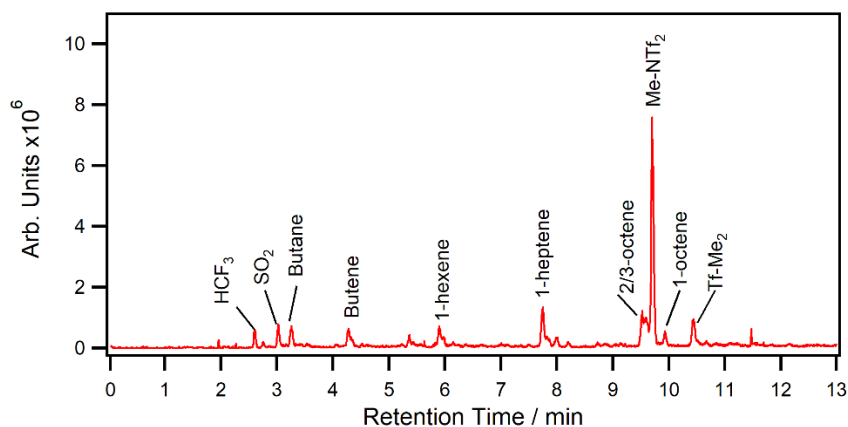

Figure S178 Gas chromatogram from TD-GC-MS of [C<sub>8</sub>C<sub>1</sub>Im][NTf<sub>2</sub>]<sub>0.33</sub>Co[NTf<sub>2</sub>]<sub>2</sub> of 0-13 minute region.

### ESI-MS Decomposition Data

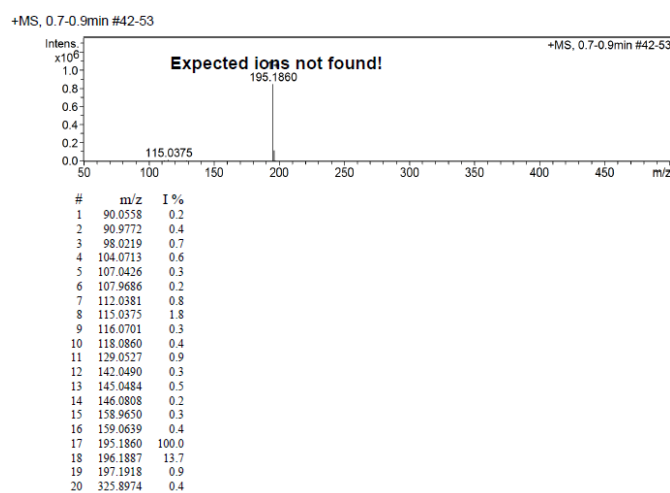

Figure S179 Positive ESI-MS of unheated [C<sub>8</sub>C<sub>1</sub>Im][NTf<sub>2</sub>].

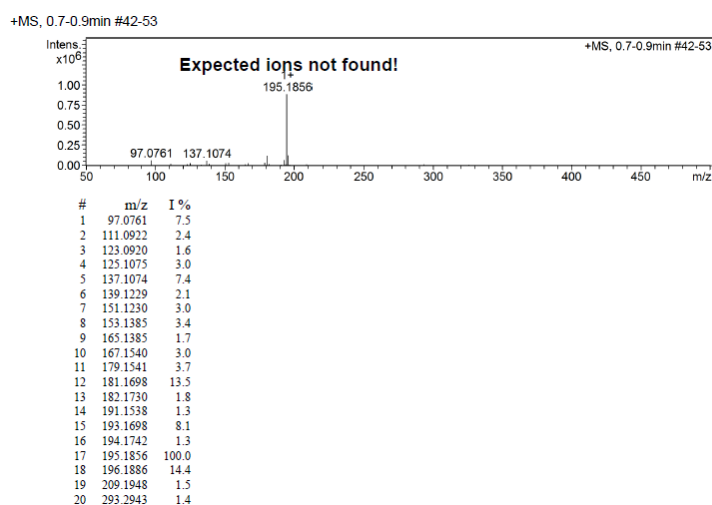

Figure S180 Positive ESI-MS from the residue of a TGA pan containing [C<sub>8</sub>C<sub>1</sub>Im][NTf<sub>2</sub>] which was heated under 10 mL min<sup>-1</sup> N<sub>2</sub> until 40% of the mass had decomposed.

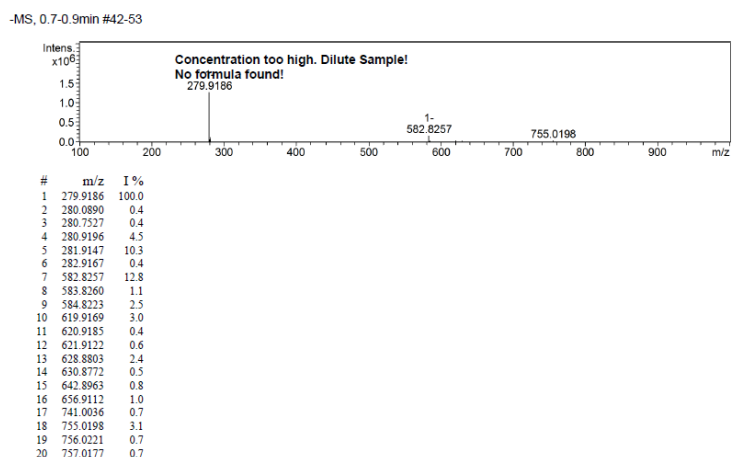

**Figure S181** Negative ESI-MS from the residue of a TGA pan containing  $[C_8C_1Im][NTf_2]$  which was heated under  $10 \text{ mL min}^{-1} N_2$  until 40% of the mass had decomposed.

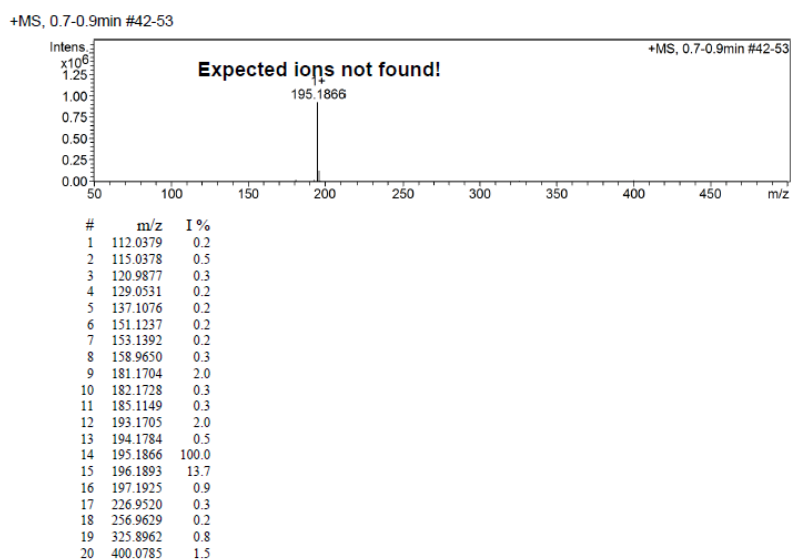

**Figure S182** Positive mode ESI-MS from the residue of a TGA pan containing  $[C_8C_1Im][NTf_2]_{0.33}Zn[NTf_2]_2$  which was heated under  $10 \text{ mL min}^{-1} N_2$  until 40% of the mass had decomposed.

-MS, 0.7-0.9min #42-53

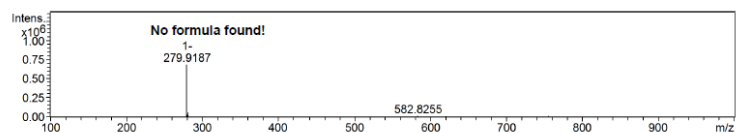

| #  | m/z      | I %   |
|----|----------|-------|
| 1  | 278.4723 | 0.1   |
| 2  | 278.5115 | 0.1   |
| 3  | 279.9187 | 100.0 |
| 4  | 280.0895 | 0.4   |
| 5  | 280.2079 | 0.2   |
| 6  | 280.7452 | 0.2   |
| 7  | 280.9199 | 4.4   |
| 8  | 281.9151 | 9.6   |
| 9  | 282.9177 | 0.4   |
| 10 | 283.9127 | 0.3   |
| 11 | 582.8255 | 2.1   |
| 12 | 583.8279 | 0.2   |
| 13 | 584.8224 | 0.4   |
| 14 | 619.9165 | 1.4   |
| 15 | 620.9176 | 0.2   |
| 16 | 621.9135 | 0.3   |
| 17 | 633.9290 | 0.1   |
| 18 | 755.0196 | 2.0   |
| 19 | 756.0223 | 0.4   |
| 20 | 757.0173 | 0.4   |

**Figure S183** Negative mode ESI-MS from the residue of a TGA pan containing  $[\text{C}_8\text{C}_1\text{Im}][\text{NTf}_2]_{0.33}\text{Zn}[\text{NTf}_2]_2$  which was heated under  $10 \text{ mL min}^{-1} \text{ N}_2$  until 40% of the mass had decomposed.

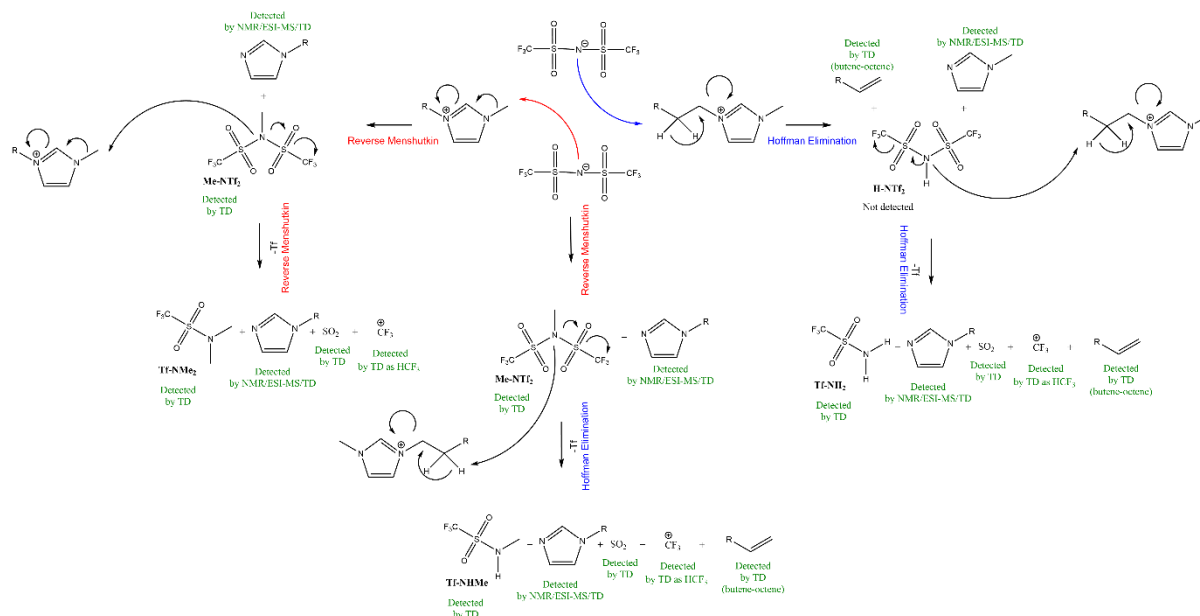

**Scheme S1** Mechanism of thermal decomposition for 1-alkyl-3-methylimidazolium bistriflimide ionic liquids. Weakly coordinated metals enhance the production of  $\text{Tf-NH}_2$  through successive elimination reactions by either stabilising a transition state or polarising the  $[\text{NTf}_2]^-$  anion.

## Annealing Experiments

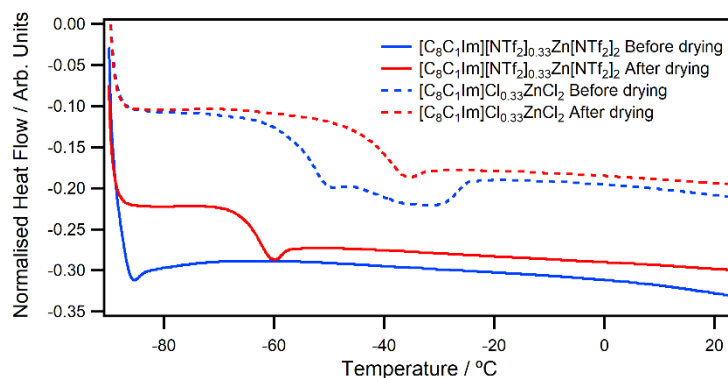

**Figure S184** DSC data before and after *in situ* drying of  $[C_8C_1Im]X_{0.33}ZnX_2$  samples with 10 wt% water for 45 minutes at 100 °C.

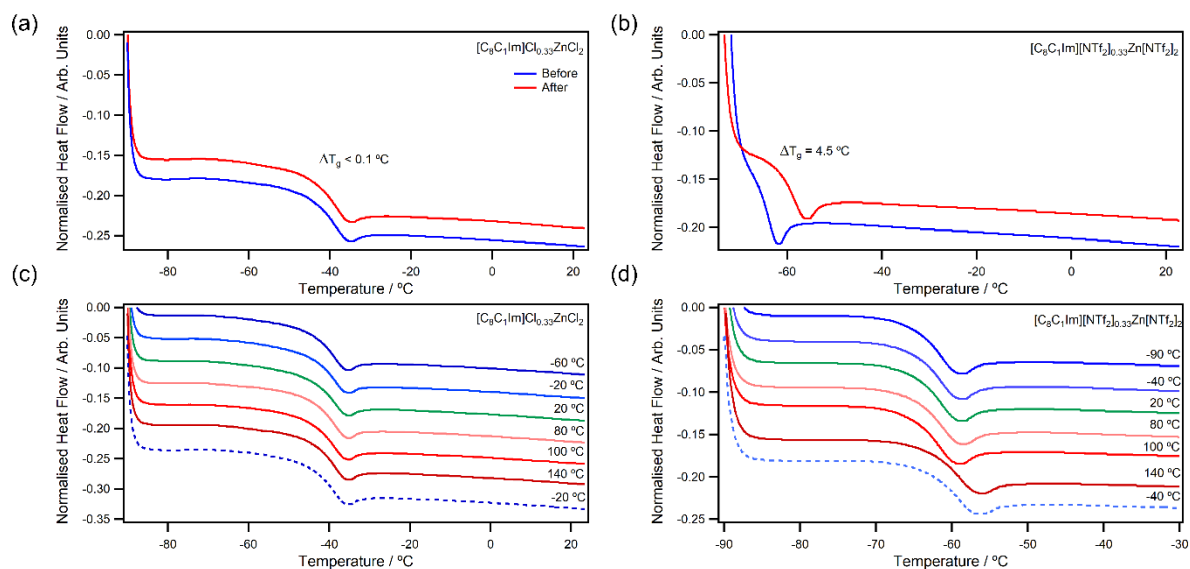

**Figure S185** DSC annealing experiments, showing DSC thermograms (a-b) before (blue) and after (red) heating. (c-d) DSC scans between 1 hour annealing isothermal holds.

## Viscosity and Density

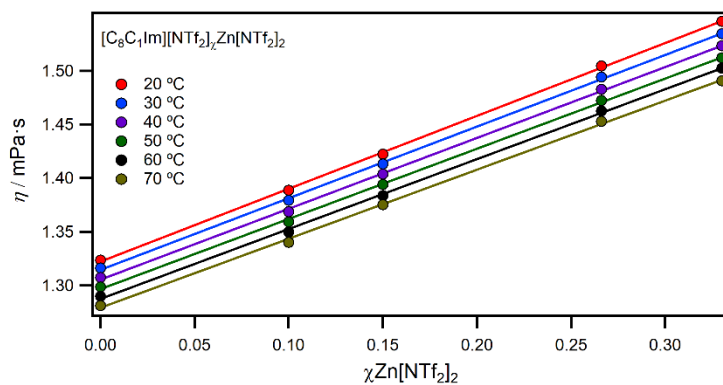

Figure S186 Densities of  $[C_8C_1Im][NTf_2]_xZn[NTf_2]_2$  ionic liquids against mole fraction of  $Zn[NTf_2]_2$ .

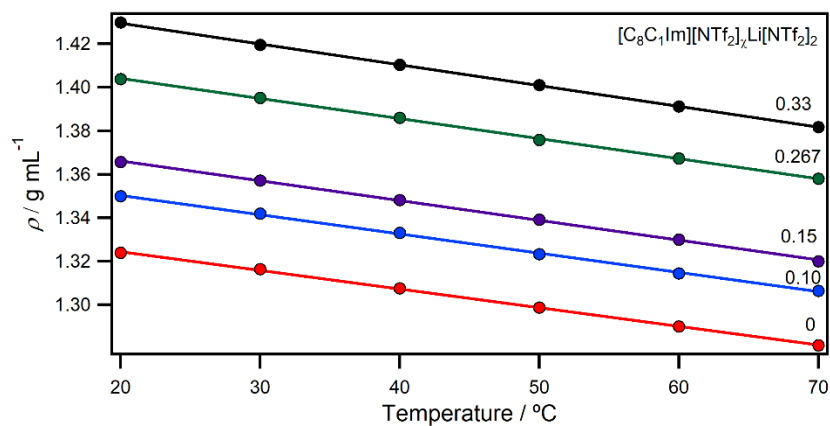

Figure S187 Densities of  $[C_8C_1Im][NTf_2]_xLi[NTf_2]_2$  ionic liquids against temperature.

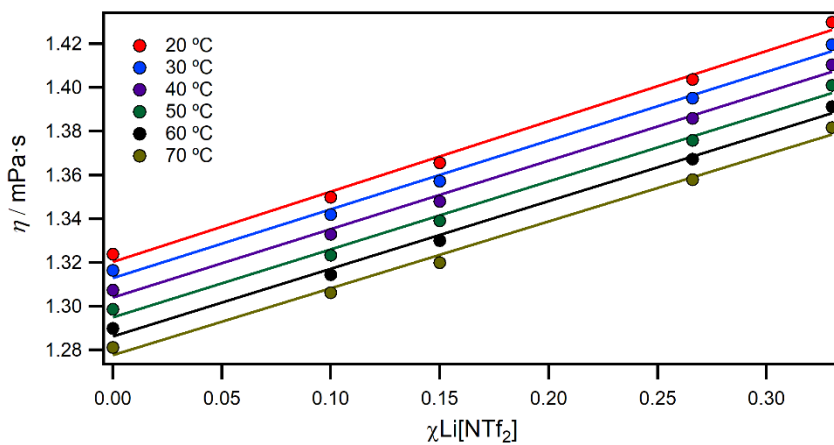

Figure S188 Densities of  $[C_8C_1Im][NTf_2]_xLi[NTf_2]_2$  ionic liquids against mole fraction of  $Li[NTf_2]_2$ .

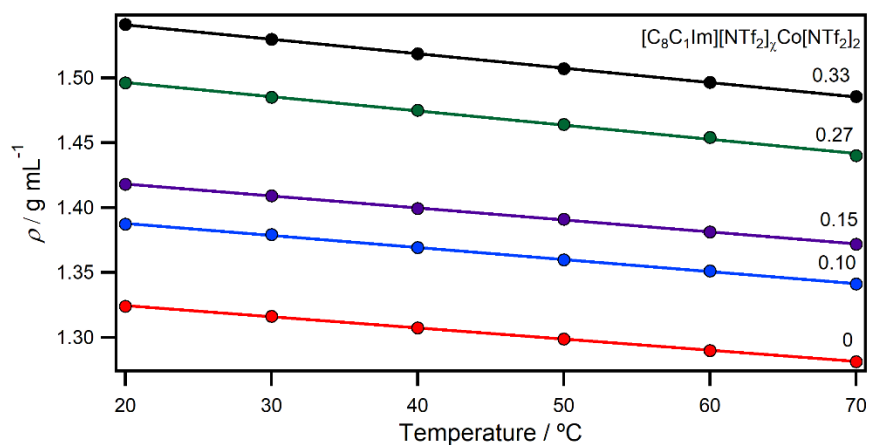

Figure S189 Densities of  $[C_8C_1Im][NTf_2]_xCo[NTf_2]_2$  ionic liquids against temperature.

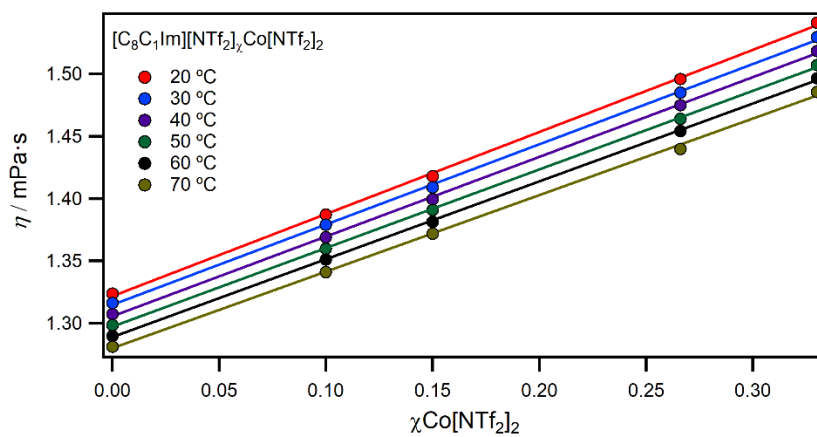

Figure S190 Densities of  $[C_8C_1Im][NTf_2]_xCo[NTf_2]_2$  ionic liquids against mole fraction of  $Co[NTf_2]_2$ .

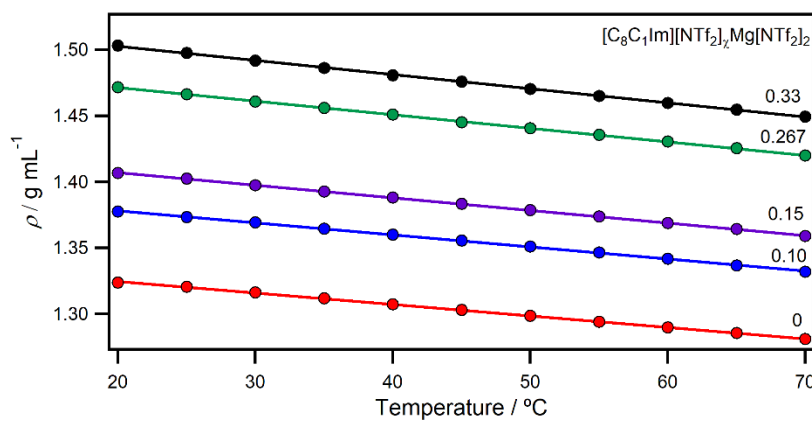

Figure S191 Densities of  $[C_8C_1Im][NTf_2]_xMg[NTf_2]_2$  ionic liquids against temperature.



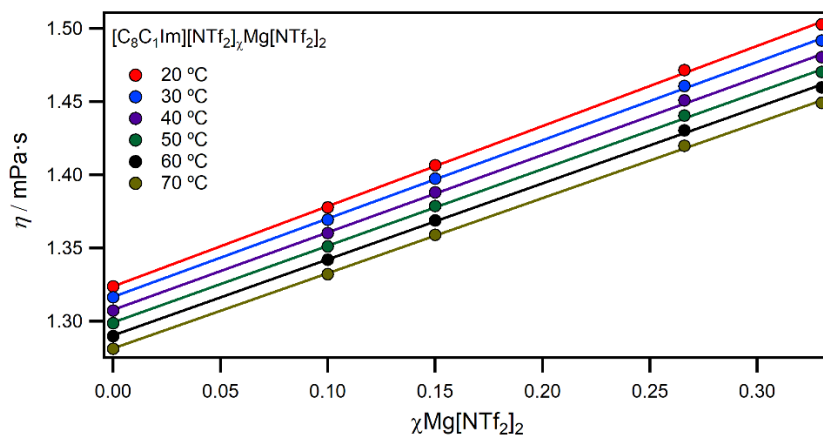

Figure S192 Densities of  $[C_8C_1Im][NTf_2]_xMg[NTf_2]_2$  ionic liquids against mole fraction of  $Mg[NTf_2]_2$ .

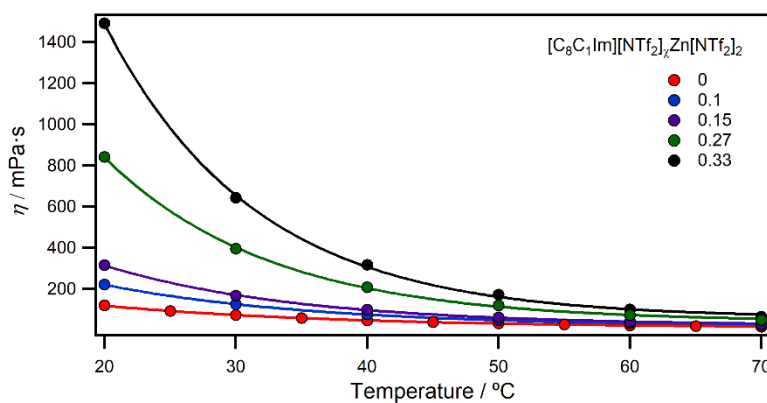

Figure S193 Viscosities of  $[C_8C_1Im][NTf_2]_xZn[NTf_2]_2$  ionic liquids against temperature.

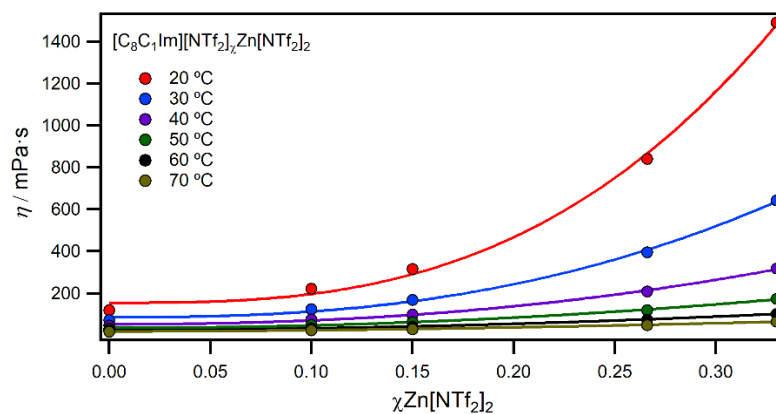

Figure S194 Viscosities of  $[C_8C_1Im][NTf_2]_xZn[NTf_2]_2$  ionic liquids against mole fraction of  $Zn[NTf_2]_2$ .

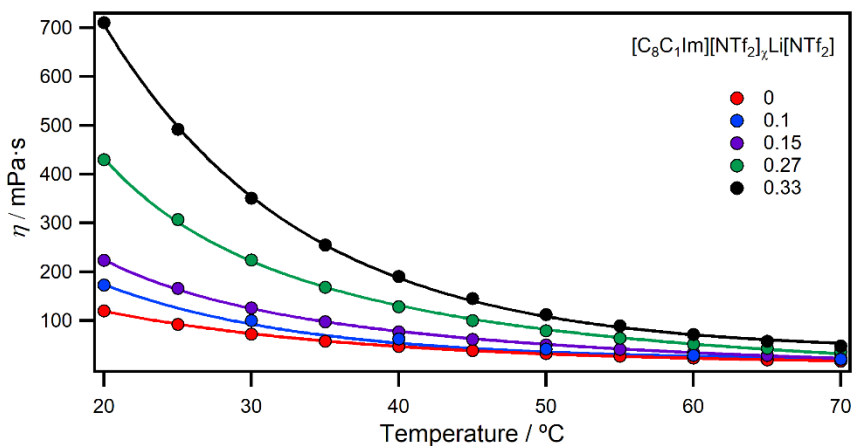

Figure S195 Viscosities of  $[\text{C}_8\text{C}_1\text{Im}][\text{NTf}_2]_x\text{Li}[\text{NTf}_2]$  ionic liquids against temperature.

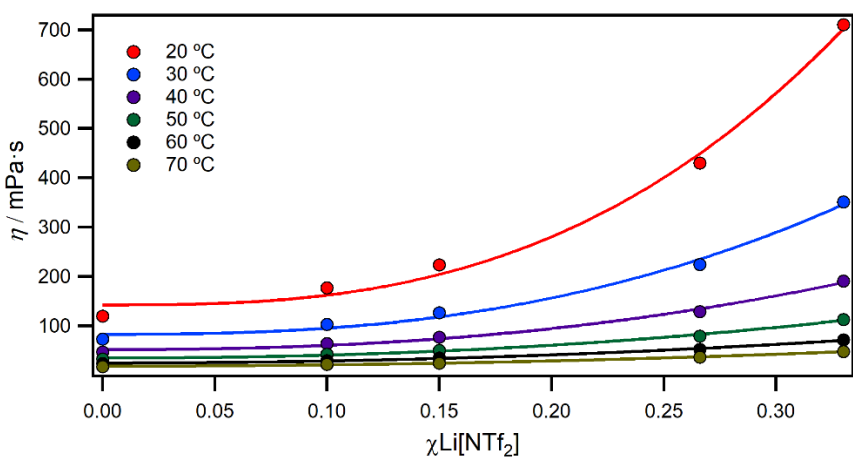

Figure S196 Viscosities of  $[\text{C}_8\text{C}_1\text{Im}][\text{NTf}_2]_x\text{Li}[\text{NTf}_2]$  ionic liquids against mole fraction of  $\text{Li}[\text{NTf}_2]$ .

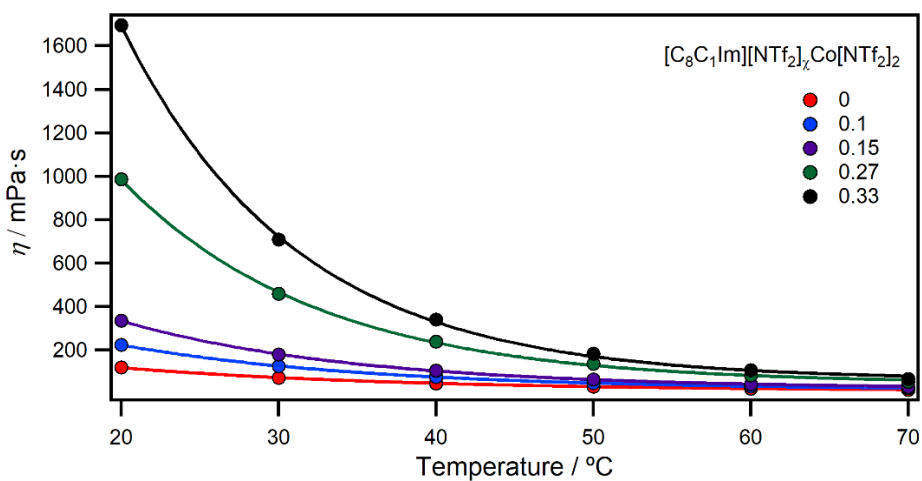

Figure S197 Viscosities of  $[\text{C}_8\text{C}_1\text{Im}][\text{NTf}_2]_x\text{Co}[\text{NTf}_2]_2$  ionic liquids against temperature.

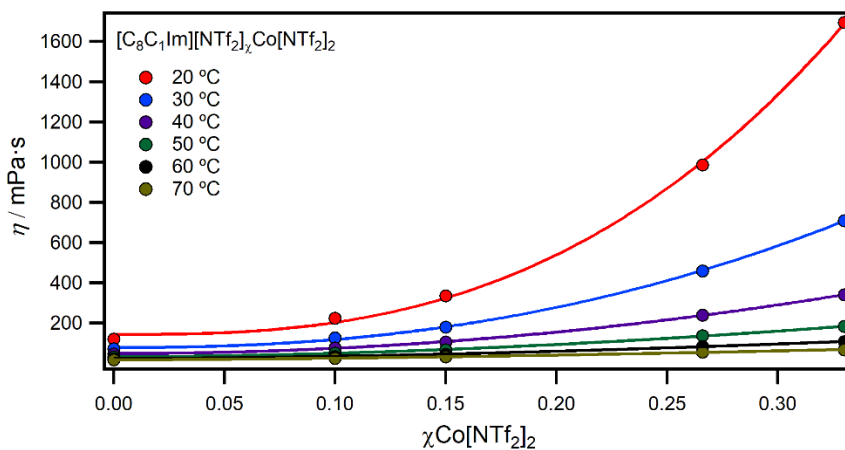

Figure S198 Viscosities of  $[\text{C}_8\text{C}_1\text{Im}][\text{NTf}_2]_x\text{Co}[\text{NTf}_2]_2$  ionic liquids against mole fraction of  $\text{Co}[\text{NTf}_2]_2$ .

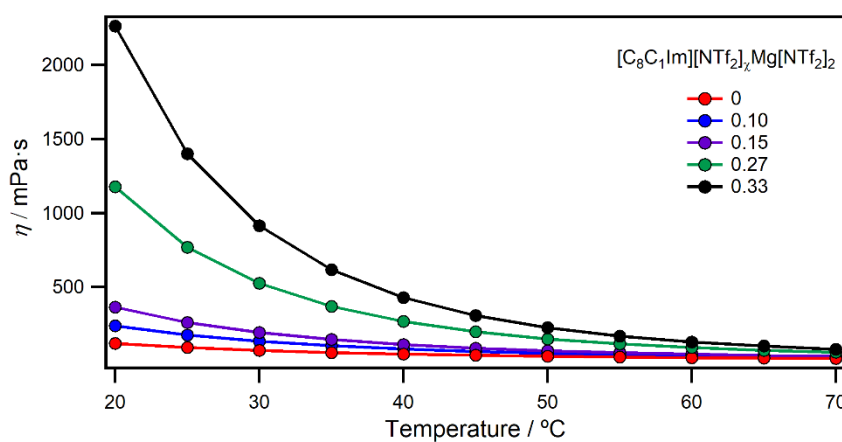

Figure S199 Viscosities of  $[\text{C}_8\text{C}_1\text{Im}][\text{NTf}_2]_x\text{Mg}[\text{NTf}_2]_2$  ionic liquids against temperature.

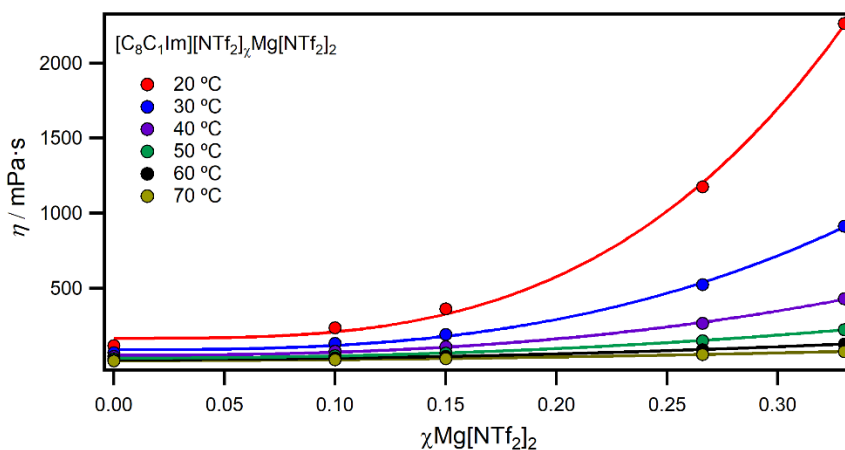

Figure S200 Viscosities of  $[\text{C}_8\text{C}_1\text{Im}][\text{NTf}_2]_x\text{Mg}[\text{NTf}_2]_2$  ionic liquids against mole fraction of  $\text{Mg}[\text{NTf}_2]_2$ .

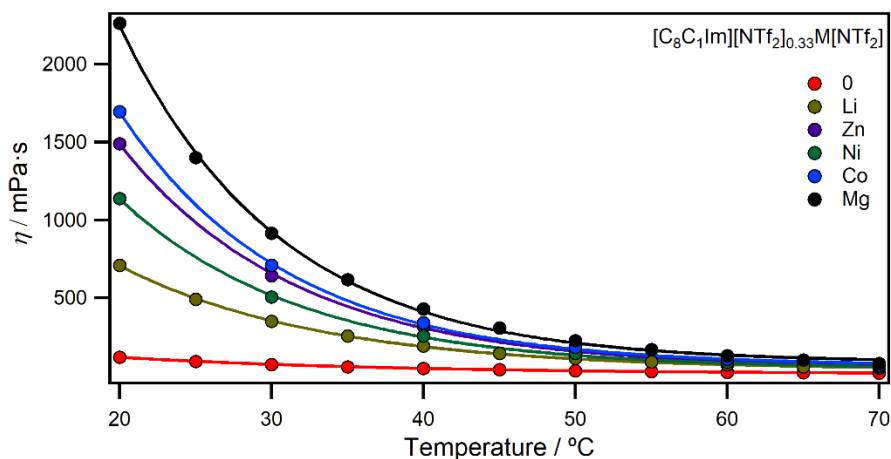

**Figure S201** Viscosities of  $[\text{C}_8\text{C}_1\text{Im}][\text{NTf}_2]_{0.33}\text{M}[\text{NTf}_2]_2$  ionic liquids against temperature.

**Table S2** Viscosities of  $[\text{C}_8\text{C}_1\text{Im}][\text{NTf}_2]_{\chi}\text{Zn}[\text{NTf}_2]_2$  ionic liquids from 20-70°C.

| $\chi$ | Viscosity / mPa.s |       |       |       |       |       |
|--------|-------------------|-------|-------|-------|-------|-------|
|        | 20 °C             | 30 °C | 40 °C | 50 °C | 60 °C | 70 °C |
| 0      | 120.1             | 72.9  | 47.3  | 32.4  | 23.4  | 17.3  |
| 0.1    | 221.7             | 125.1 | 76.2  | 49.5  | 33.9  | 24.2  |
| 0.15   | 315.4             | 168.7 | 99.1  | 62.5  | 41.7  | 29.2  |
| 0.27   | 841.4             | 395.7 | 209.0 | 120.1 | 74.3  | 48.9  |
| 0.33   | 1490.6            | 642.8 | 317.2 | 172.5 | 102.1 | 64.8  |

**Table S3** Densities of  $[\text{C}_8\text{C}_1\text{Im}][\text{NTf}_2]_{\chi}\text{Zn}[\text{NTf}_2]_2$  ionic liquids from 20-70°C.

| $\chi$ | Density / g mL <sup>-1</sup> |       |       |       |       |       |
|--------|------------------------------|-------|-------|-------|-------|-------|
|        | 20 °C                        | 30 °C | 40 °C | 50 °C | 60 °C | 70 °C |
| 0      | 1.32                         | 1.32  | 1.31  | 1.30  | 1.29  | 1.28  |
| 0.1    | 1.39                         | 1.38  | 1.37  | 1.36  | 1.35  | 1.34  |
| 0.15   | 1.42                         | 1.41  | 1.40  | 1.39  | 1.38  | 1.38  |
| 0.27   | 1.50                         | 1.49  | 1.48  | 1.47  | 1.46  | 1.45  |
| 0.33   | 1.55                         | 1.53  | 1.52  | 1.51  | 1.50  | 1.49  |

**Table S4** Viscosities of  $[\text{C}_8\text{C}_1\text{Im}][\text{NTf}_2]_{\chi}\text{Mg}[\text{NTf}_2]_2$  ionic liquids from 20-70°C.

| $\chi$ | Viscosity / mPa.s |       |       |       |       |       |
|--------|-------------------|-------|-------|-------|-------|-------|
|        | 20 °C             | 30 °C | 40 °C | 50 °C | 60 °C | 70 °C |
| 0      | 120.1             | 72.9  | 47.3  | 32.4  | 23.4  | 17.3  |
| 0.1    | 238.8             | 134.2 | 81.4  | 52.7  | 35.9  | 25.6  |
| 0.15   | 364.0             | 193.1 | 112.3 | 70.1  | 46.4  | 32.3  |
| 0.27   | 1177.1            | 525.7 | 267.8 | 150.2 | 90.9  | 58.6  |
| 0.33   | 2263.8            | 914.9 | 430.2 | 225.7 | 129.6 | 80.0  |

**Table S5** Densities of  $[C_8C_1Im][NTf_2]_xMg[NTf_2]_2$  ionic liquids from 20-70°C.

| $\chi$ | Density / g mL <sup>-1</sup> |       |       |       |       |       |
|--------|------------------------------|-------|-------|-------|-------|-------|
|        | 20 °C                        | 30 °C | 40 °C | 50 °C | 60 °C | 70 °C |
| 0      | 1.32                         | 1.32  | 1.31  | 1.30  | 1.29  | 1.28  |
| 0.1    | 1.38                         | 1.37  | 1.36  | 1.35  | 1.34  | 1.33  |
| 0.15   | 1.41                         | 1.40  | 1.39  | 1.38  | 1.37  | 1.36  |
| 0.27   | 1.47                         | 1.46  | 1.45  | 1.44  | 1.43  | 1.42  |
| 0.33   | 1.50                         | 1.49  | 1.48  | 1.47  | 1.46  | 1.45  |

**Table S6** Viscosities of  $[C_8C_1Im][NTf_2]_xLi[NTf_2]$  ionic liquids from 20-70°C.

| $\chi$ | Viscosity / mPa.s |       |       |       |       |       |
|--------|-------------------|-------|-------|-------|-------|-------|
|        | 20 °C             | 30 °C | 40 °C | 50 °C | 60 °C | 70 °C |
| 0      | 120.1             | 72.9  | 47.3  | 32.4  | 23.4  | 17.3  |
| 0.1    | 172.7             | 100.2 | 41.8  | 41.8  | 29.3  | 21.3  |
| 0.15   | 223.4             | 126.3 | 77.3  | 50.4  | 34.5  | 24.2  |
| 0.27   | 429.9             | 224.8 | 128.9 | 79.5  | 52.2  | 36.1  |
| 0.33   | 710.6             | 351.0 | 190.5 | 112.8 | 71.5  | 48.0  |

**Table S7** Densities of  $[C_8C_1Im][NTf_2]_xLi[NTf_2]$  ionic liquids from 20-70°C.

| $\chi$ | Density / g mL <sup>-1</sup> |       |       |       |       |       |
|--------|------------------------------|-------|-------|-------|-------|-------|
|        | 20 °C                        | 30 °C | 40 °C | 50 °C | 60 °C | 70 °C |
| 0      | 1.32                         | 1.32  | 1.31  | 1.30  | 1.29  | 1.28  |
| 0.1    | 1.35                         | 1.34  | 1.33  | 1.32  | 1.31  | 1.31  |
| 0.15   | 1.37                         | 1.36  | 1.35  | 1.34  | 1.33  | 1.32  |
| 0.27   | 1.40                         | 1.40  | 1.39  | 1.38  | 1.37  | 1.36  |
| 0.33   | 1.43                         | 1.42  | 1.41  | 1.40  | 1.39  | 1.38  |

**Table S8** Viscosities of  $[C_8C_1Im][NTf_2]_xCo[NTf_2]_2$  ionic liquids from 20-70°C.

| $\chi$ | Viscosity / mPa.s |       |       |       |       |       |
|--------|-------------------|-------|-------|-------|-------|-------|
|        | 20 °C             | 30 °C | 40 °C | 50 °C | 60 °C | 70 °C |
| 0      | 120.1             | 72.9  | 47.3  | 32.4  | 23.4  | 17.3  |
| 0.1    | 224.8             | 126.0 | 76.6  | 49.7  | 34.0  | 24.3  |
| 0.15   | 335.2             | 180.2 | 105.4 | 66.2  | 44.1  | 30.9  |
| 0.27   | 986.9             | 459.2 | 239.8 | 137.3 | 84.2  | 55.0  |
| 0.33   | 1695.2            | 709.8 | 341.1 | 183.0 | 107.3 | 67.6  |

**Table S9** Densities of  $[C_8C_1Im][NTf_2]_xCo[NTf_2]_2$  ionic liquids from 20-70°C.

| $\chi$ | Density / g mL <sup>-1</sup> |       |       |       |       |       |
|--------|------------------------------|-------|-------|-------|-------|-------|
|        | 20 °C                        | 30 °C | 40 °C | 50 °C | 60 °C | 70 °C |

|      |       |      |      |      |      |      |
|------|-------|------|------|------|------|------|
| 0    | 1.32  | 1.32 | 1.31 | 1.30 | 1.29 | 1.28 |
| 0.1  | 13.87 | 1.38 | 1.37 | 1.36 | 1.35 | 1.34 |
| 0.15 | 1.42  | 1.41 | 1.40 | 1.39 | 1.38 | 1.37 |
| 0.27 | 1.50  | 1.49 | 1.48 | 1.46 | 1.45 | 1.44 |
| 0.33 | 1.54  | 1.53 | 1.52 | 1.51 | 1.50 | 1.49 |

**Table S10** Viscosities of  $[\text{C}_8\text{C}_1\text{Im}][\text{NTf}_2]_{0.33}\text{M}[\text{NTf}_2]_2$  ionic liquids from 20-70°C.

| M  | Viscosity / mPa.s |       |       |       |       |       |
|----|-------------------|-------|-------|-------|-------|-------|
|    | 20 °C             | 30 °C | 40 °C | 50 °C | 60 °C | 70 °C |
| Li | 710.6             | 351.0 | 190.5 | 112.8 | 71.5  | 48.0  |
| Ni | 1137.7            | 505.5 | 255.2 | 143.1 | 86.7  | 56.1  |
| Zn | 1490.6            | 642.8 | 317.2 | 172.5 | 102.1 | 64.8  |
| Co | 1695.2            | 709.8 | 341.1 | 183.0 | 107.3 | 67.6  |
| Mg | 2263.8            | 914.9 | 430.2 | 225.7 | 129.6 | 80.0  |

**Table S11** Densities of  $[\text{C}_8\text{C}_1\text{Im}][\text{NTf}_2]_{0.33}\text{M}[\text{NTf}_2]_2$  ionic liquids from 20-70°C.

| M  | Density / g mL <sup>-1</sup> |       |       |       |       |       |
|----|------------------------------|-------|-------|-------|-------|-------|
|    | 20 °C                        | 30 °C | 40 °C | 50 °C | 60 °C | 70 °C |
| Li | 1.43                         | 1.42  | 1.41  | 1.40  | 1.39  | 1.38  |
| Mg | 1.50                         | 1.49  | 1.48  | 1.47  | 1.46  | 1.45  |
| Ni | 1.53                         | 1.52  | 1.51  | 1.50  | 1.49  | 1.48  |
| Co | 1.54                         | 1.53  | 1.52  | 1.51  | 1.50  | 1.49  |
| Zn | 1.55                         | 1.53  | 1.52  | 1.51  | 1.50  | 1.49  |

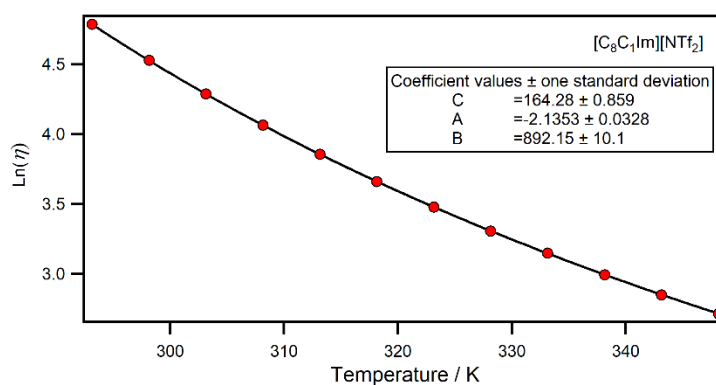

**Figure S202** VFT fit from Equation 1 of viscosity data for  $[\text{C}_8\text{C}_1\text{Im}][\text{NTf}_2]$ .

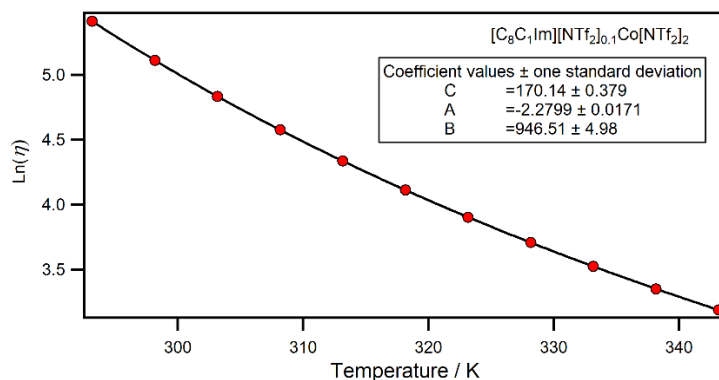

**Figure S203** VFT fit from Equation 1 of viscosity data for  $[C_8C_1Im][NTf_2]_{0.1}Co[NTf_2]_2$ .

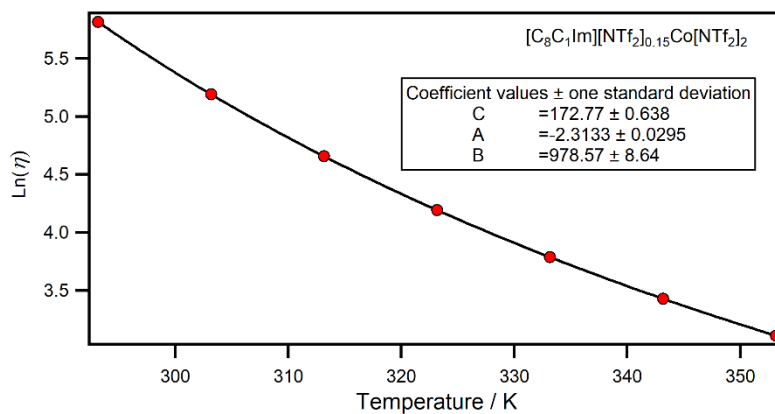

**Figure S204** VFT fit from Equation 1 of viscosity data for  $[C_8C_1Im][NTf_2]_{0.15}Co[NTf_2]_2$ .

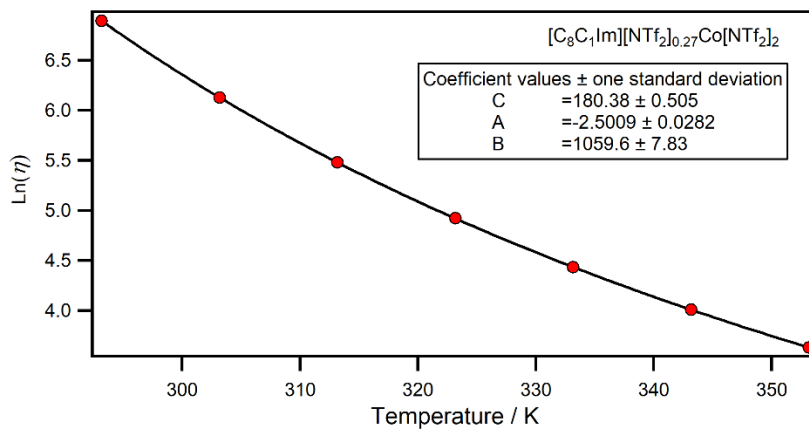

**Figure S205** VFT fit from Equation 1 of viscosity data for  $[C_8C_1Im][NTf_2]_{0.27}Co[NTf_2]_2$ .

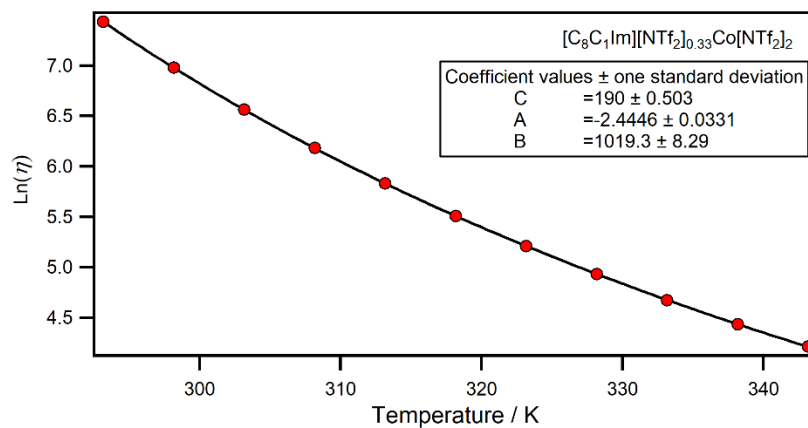

Figure S206 VFT fit from Equation 1 of viscosity data for  $[C_8C_1Im][NTf_2]_{0.33}Co[NTf_2]_2$ .

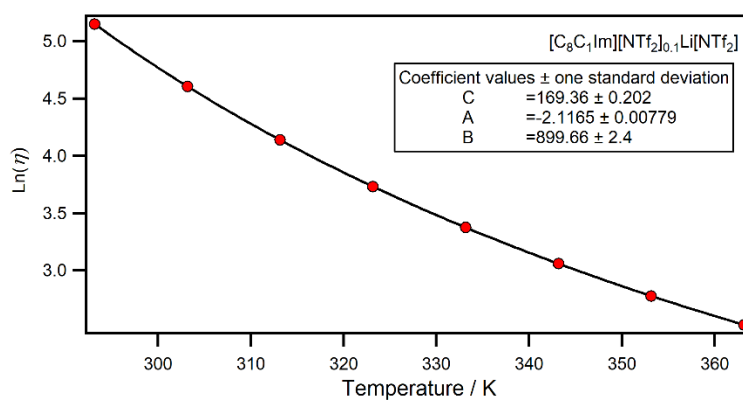

Figure S207 VFT fit from Equation 1 of viscosity data for  $[C_8C_1Im][NTf_2]_{0.1}Li[NTf_2]$ .

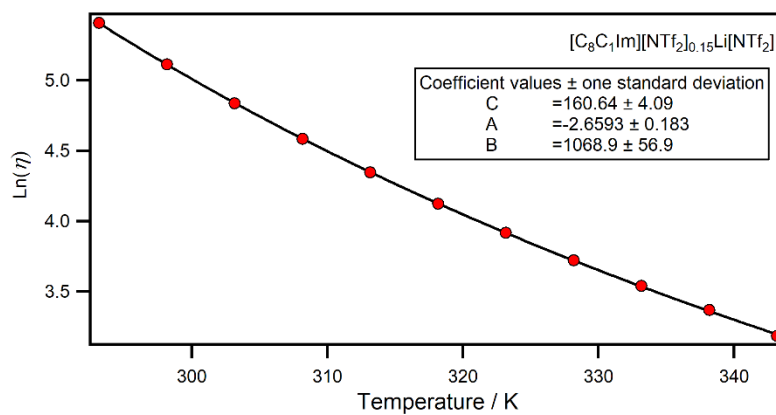

Figure S208 VFT fit from Equation 1 of viscosity data for  $[C_8C_1Im][NTf_2]_{0.15}Li[NTf_2]$ .



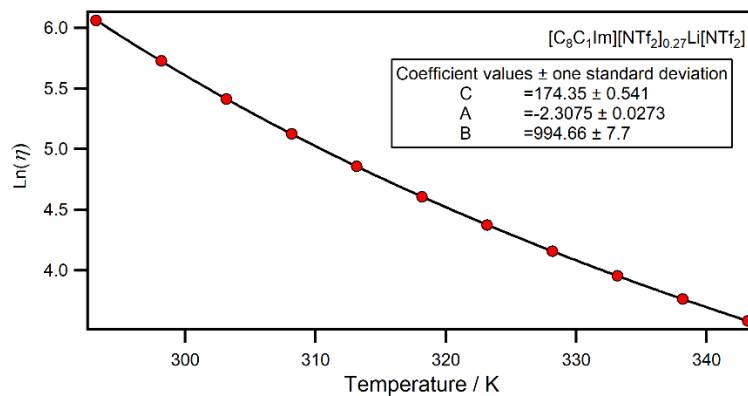

Figure S209 VFT fit from Equation 1 of viscosity data for  $[C_8C_1Im][NTf_2]_{0.27}Li[NTf_2]$ .

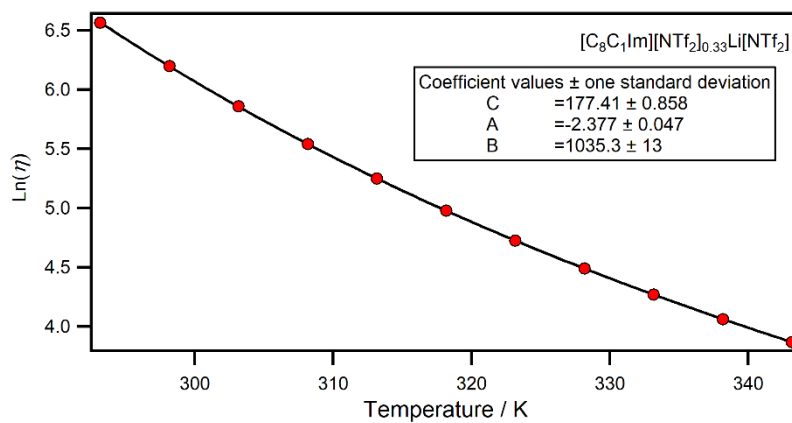

Figure S210 VFT fit from Equation 1 of viscosity data for  $[C_8C_1Im][NTf_2]_{0.33}Li[NTf_2]$ .

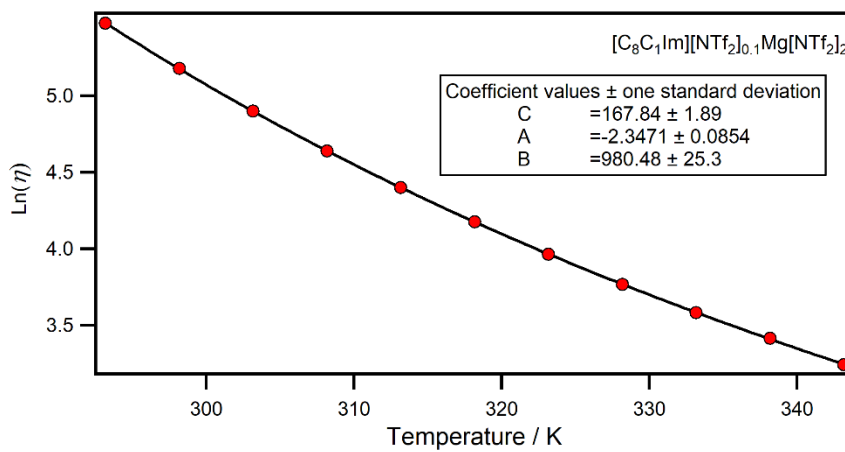

Figure S211 VFT fit from Equation 1 of viscosity data for  $[C_8C_1Im][NTf_2]_{0.1}Mg[NTf_2]_2$ .

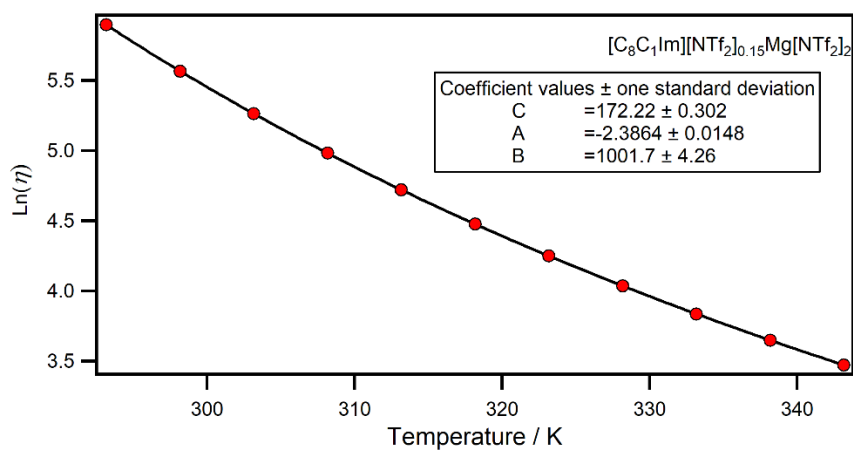

Figure S212 VFT fit from Equation 1 of viscosity data for [C<sub>8</sub>C<sub>1</sub>Im][NTf<sub>2</sub>]<sub>0.15</sub>Mg[NTf<sub>2</sub>]<sub>2</sub>.

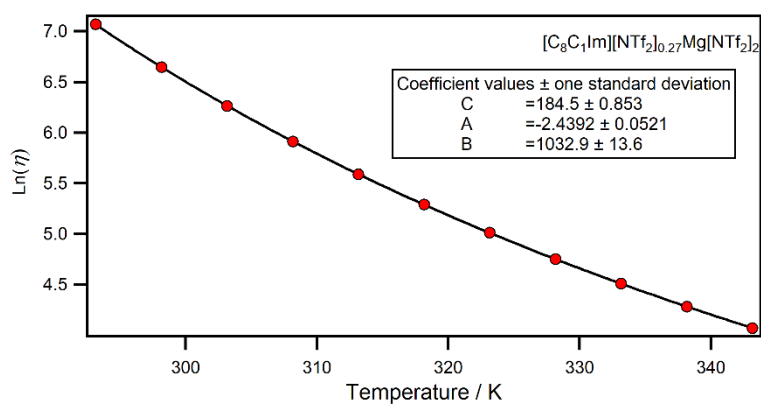

Figure S213 VFT fit from Equation 1 of viscosity data for [C<sub>8</sub>C<sub>1</sub>Im][NTf<sub>2</sub>]<sub>0.27</sub>Mg[NTf<sub>2</sub>]<sub>2</sub>.

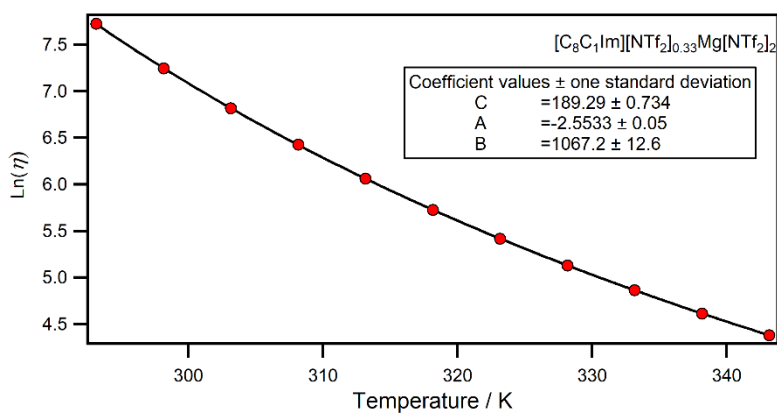

Figure S214 VFT fit from Equation 1 of viscosity data for [C<sub>8</sub>C<sub>1</sub>Im][NTf<sub>2</sub>]<sub>0.33</sub>Mg[NTf<sub>2</sub>]<sub>2</sub>.

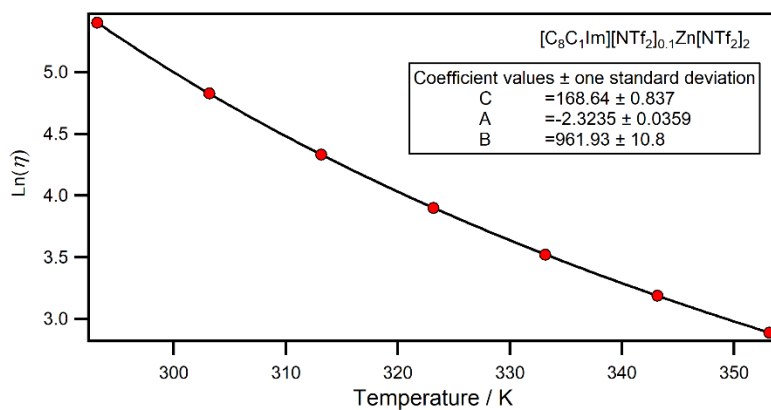

Figure S215 VFT fit from Equation 1 of viscosity data for  $[C_8C_1Im][NTf_2]_{0.1}Zn[NTf_2]_2$ .

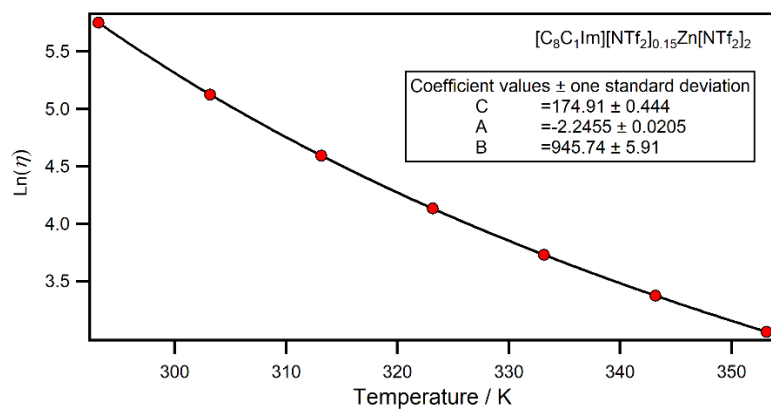

Figure S216 VFT fit from Equation 1 of viscosity data for  $[C_8C_1Im][NTf_2]_{0.15}Zn[NTf_2]_2$ .

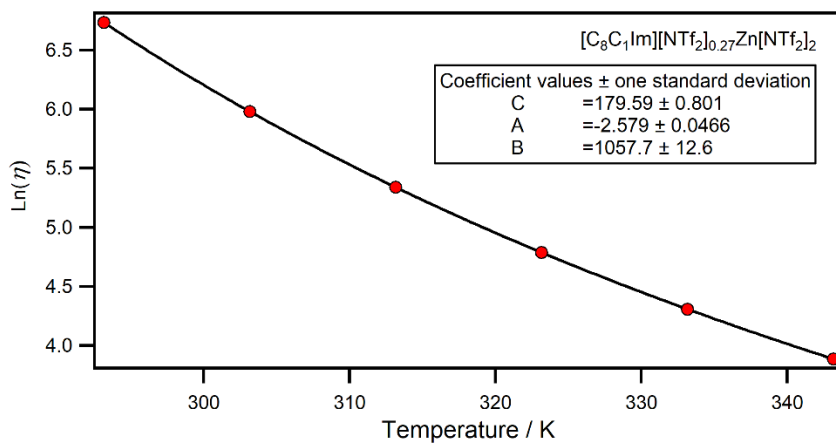

Figure S217 VFT fit from Equation 1 of viscosity data for  $[C_8C_1Im][NTf_2]_{0.27}Zn[NTf_2]_2$ .

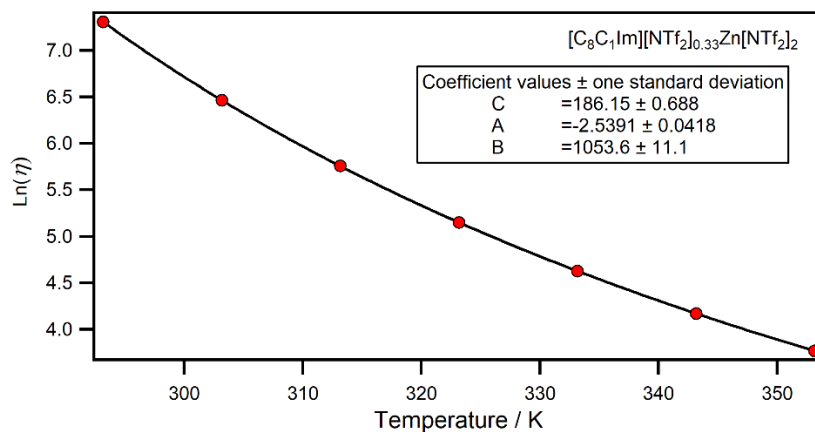

**Figure S218** VFT fit from Equation 1 of viscosity data for  $[\text{C}_8\text{C}_1\text{Im}][\text{NTf}_2]_{0.33}\text{Zn}[\text{NTf}_2]_2$ .

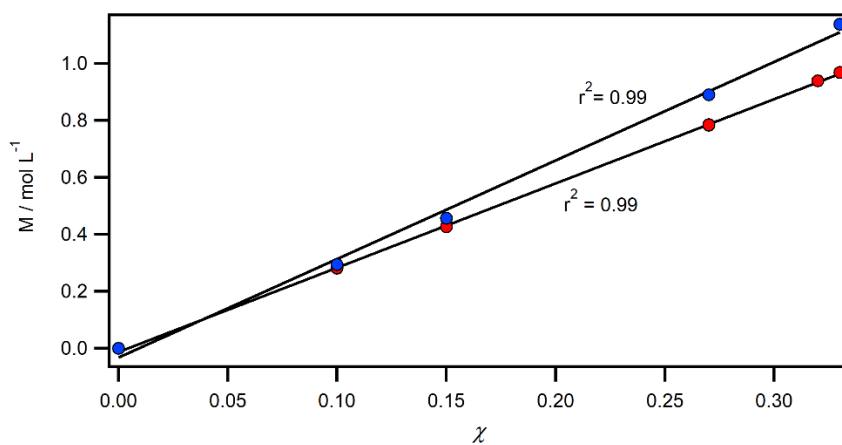

**Figure S219** Concentration against mole fraction for +1 (blue) and +2 (red) MILs.

**Table S12** Calculated molecular volumes ( $V_m$ ) and parameters  $A_\eta$ ,  $B$ , and  $T_0$  calculated from optimised VFT fitting of viscosity data. Angell's strength parameter is  $D = K_\eta/T_0$ .

| Cation                             | Anion               | Metal                              | $\chi$ | M / mol L <sup>-1</sup> | $T_g$ |       | $V_m$  | $\eta_{exp}$ (25 °C) | Optimised VFT Parameters |       |       |        | $T_g/T_0$ | $D$   | $\eta_{calc}$ (25 °C) | $\rho$ / g mL <sup>-1</sup> | $\Delta\eta_{(calc-exp)}$ |  |
|------------------------------------|---------------------|------------------------------------|--------|-------------------------|-------|-------|--------|----------------------|--------------------------|-------|-------|--------|-----------|-------|-----------------------|-----------------------------|---------------------------|--|
|                                    |                     |                                    |        |                         | °C    | K     |        |                      | $A_\eta$                 | $B$   | $T_0$ |        |           |       |                       |                             |                           |  |
| [C <sub>8</sub> C <sub>1</sub> Im] | [NTf <sub>2</sub> ] |                                    | 0      | 0.00                    | -86.0 | 187.1 | 358.5  | 92.642               | 0.12                     | 892   | 164.3 | -108.9 | 1.14      | 5.43  | 92.7                  | 1.32                        | 0.0                       |  |
|                                    |                     | Zn[NTf <sub>2</sub> ] <sub>2</sub> | 0.1    | 0.28                    |       |       | 355.5  |                      | 0.10                     | 962   | 168.6 | -104.5 |           |       | 164.7                 | 1.38                        |                           |  |
|                                    |                     |                                    | 0.15   | 0.43                    | -74.3 | 198.8 | 353.9  |                      |                          | 0.12  | 892   | 174.9  | -98.2     | 1.14  | 5.41                  | 227.8                       | 1.42                      |  |
|                                    |                     |                                    | 0.27   | 0.78                    | -65.3 | 207.8 | 350.2  |                      |                          | 0.11  | 946   | 179.6  | -93.6     | 1.16  | 5.89                  | 568.1                       | 1.50                      |  |
|                                    |                     | 0.33                               | 0.97   | -61.6                   | 211.5 | 348.3 |        |                      | 0.08                     | 1058  | 186.2 | -87.0  | 1.14      | 5.66  | 961.1                 | 1.54                        |                           |  |
|                                    |                     | Co[NTf <sub>2</sub> ] <sub>2</sub> | 0.1    | 0.28                    | -78.3 | 194.8 | 355.2  | 166.17               | 0.08                     | 1054  | 170.1 | -103.0 | 1.15      | 5.56  | 166.4                 | 1.38                        | 0.2                       |  |
|                                    |                     |                                    | 0.15   | 0.43                    | -74.0 | 199.2 | 353.5  |                      | 0.10                     | 947   | 172.8 | -100.4 | 1.15      | 5.66  | 242.6                 | 1.41                        |                           |  |
|                                    |                     |                                    | 0.27   | 0.78                    | -64.6 | 208.5 | 349.4  |                      | 0.10                     | 979   | 180.4 | -92.8  | 1.16      | 5.87  | 662.7                 | 1.49                        |                           |  |
|                                    |                     |                                    | 0.33   | 0.97                    | -61.3 | 211.8 | 347.4  | 1075.9               | 0.08                     | 1060  | 190.0 | -83.1  | 1.11      | 5.36  | 1075.2                | 1.54                        | -0.7                      |  |
|                                    |                     | Mg[NTf <sub>2</sub> ] <sub>2</sub> | 0.1    | 0.28                    | -78.5 | 194.6 | 356.0  | 177.48               | 0.09                     | 1019  | 167.8 | -105.3 | 1.16      | 5.84  | 177.2                 | 1.37                        | -0.3                      |  |
|                                    |                     |                                    | 0.15   | 0.43                    | -73.6 | 199.5 | 354.7  | 261.64               | 0.10                     | 980   | 172.2 | -100.9 | 1.16      | 5.82  | 261.9                 | 1.40                        | 0.3                       |  |
|                                    |                     |                                    | 0.27   | 0.78                    | -64.3 | 208.8 | 351.7  | 769.53               | 0.09                     | 1002  | 184.5 | -88.6  | 1.13      | 5.60  | 772.2                 | 1.47                        | 2.7                       |  |
|                                    |                     |                                    | 0.32   | 0.94                    | -58.9 | 214.2 | 350.4  | 1400.6               | 0.09                     | 1033  | 189.3 | -83.9  | 1.13      | 5.64  | 1408.3                | 1.50                        | 7.7                       |  |
|                                    |                     | Li[NTf <sub>2</sub> ] <sub>2</sub> | 0.1    | 0.29                    | -79.5 | 193.6 | 340.0  |                      | 0.08                     | 1067  | 169.4 | -103.8 | 1.14      | 5.31  | 130.2                 | 1.35                        |                           |  |
|                                    |                     |                                    | 0.15   | 0.46                    | -78.7 | 194.4 | 330.8  | 166.52               | 0.12                     | 900   | 160.6 | -112.5 | 1.21      | 6.65  | 166.3                 | 1.36                        | -0.2                      |  |
|                                    |                     |                                    | 0.27   | 0.89                    | -71.7 | 201.4 | 308.6  | 307.59               | 0.07                     | 1069  | 174.4 | -98.8  | 1.16      | 5.70  | 307.0                 | 1.40                        | -0.6                      |  |
|                                    |                     | 0.33                               | 1.14   | -67.2                   | 205.9 | 297.5 | 491.76 | 0.10                 | 995                      | 177.4 | -95.7 | 1.16   | 5.84      | 491.6 | 1.42                  | -0.2                        |                           |  |

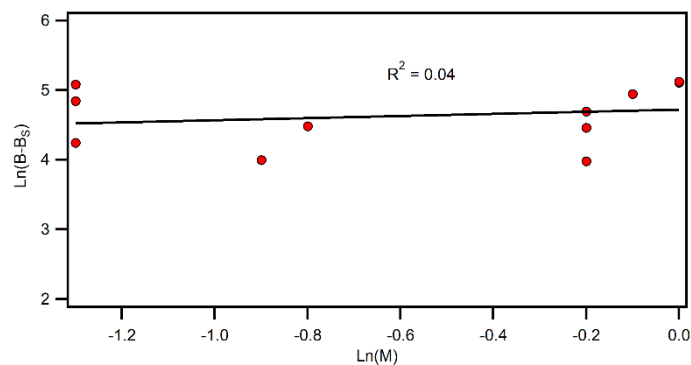

**Figure S220** Correlations of  $\text{Ln}(B-B_s)$  vs  $\text{Ln}(M)$  where  $B$  is the pseudo-activation energy parameter of the MIL solution and  $B_s$  is the same parameter for pure IL. Values were derived from VFT fittings and are plotted against  $\text{Ln}(M)$  which is the natural logarithm of the molar concentration in  $\text{g L}^{-1}$ .

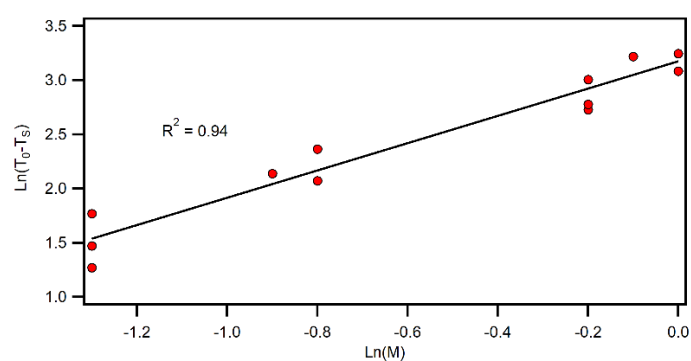

**Figure S221** Correlations of  $\text{Ln}(T_0-T_s)$  where  $T$  is the Vogel temperature of the MIL solution and  $B_s$  is the same parameter for pure IL. Values were derived from VFT fittings and are plotted against  $\text{Ln}(M)$  which is the natural logarithm of the molar concentration in  $\text{g L}^{-1}$ .

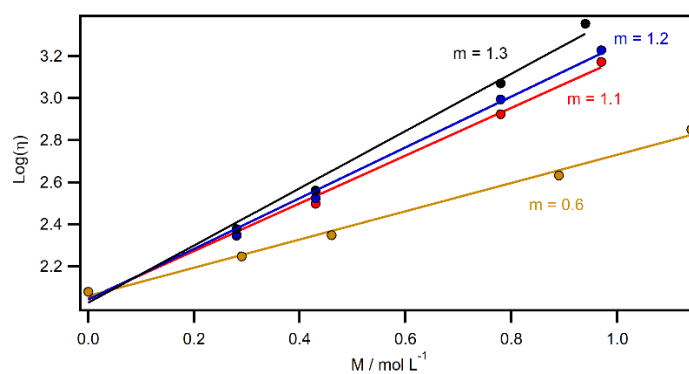

**Figure S222** Logarithm of viscosity against molar concentration for  $[\text{C}_8\text{C}_1\text{Im}][\text{NTf}_2]_x\text{M}[\text{NTf}_2]_n$  where  $M = \text{Li}$  (yellow),  $\text{Zn}$  (red),  $\text{Co}$  (blue), and  $\text{Mg}$  (black).

## Heat Capacity Data

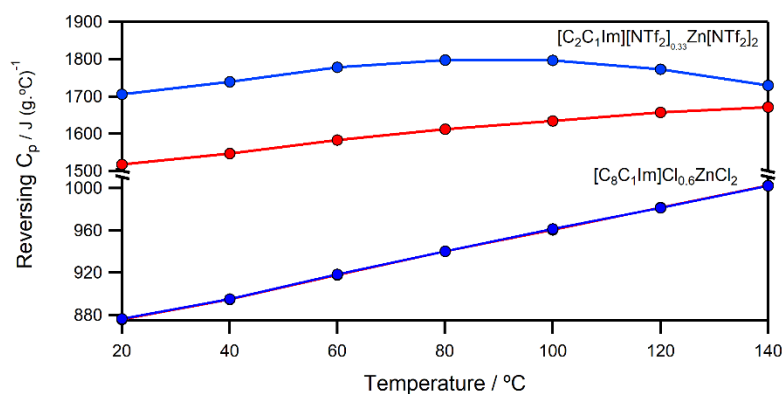

**Figure S223** QI-MDSC heat capacities for  $[C_2C_1Im][NTf_2]_{0.33}Zn[NTf_2]_2$  and a chlorozincate IL with excess  $ZnCl_2$ .

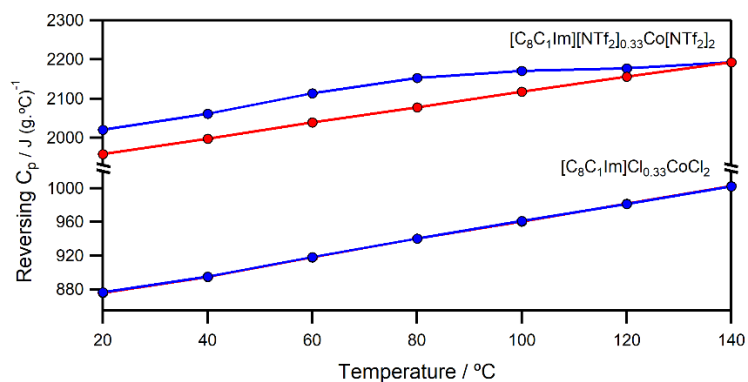

**Figure S224** QI-MDSC heat capacities for  $[C_8C_1Im][NTf_2]_{0.33}Co[NTf_2]_2$  and a cobalt chloride analogue.

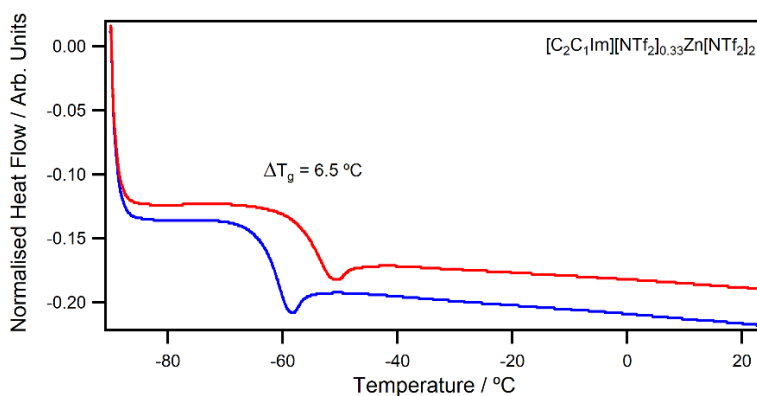

**Figure S225** Change in glass transition before (blue) and after (red) QI-MDSC experiments for  $[C_2C_1Im][NTf_2]_{0.33}Zn[NTf_2]_2$ .

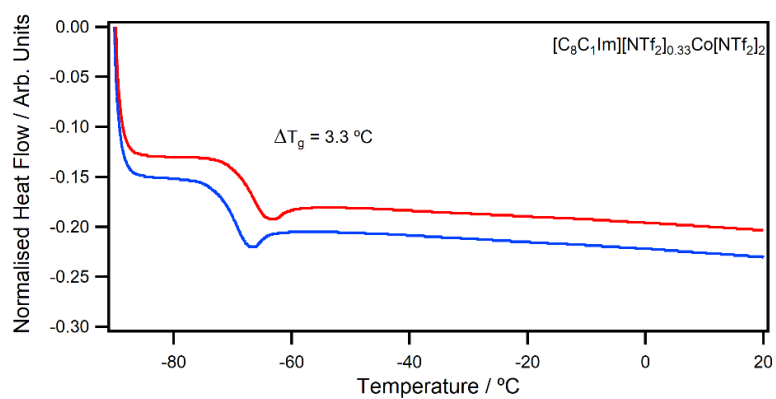

**Figure S226** Change in glass transition before (blue) and after (red) QI-MDSC experiments for  $[\text{C}_8\text{C}_1\text{Im}][\text{NTf}_2]_{0.33}\text{Co}[\text{NTf}_2]_2$ .

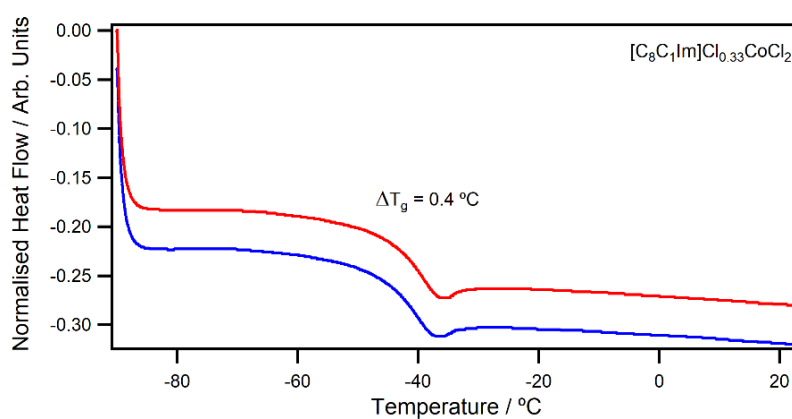

**Figure S227** Change in glass transition before (blue) and after (red) QI-MDSC experiments for  $[\text{C}_8\text{C}_1\text{Im}]\text{Cl}_{0.33}\text{CoCl}_2$ .

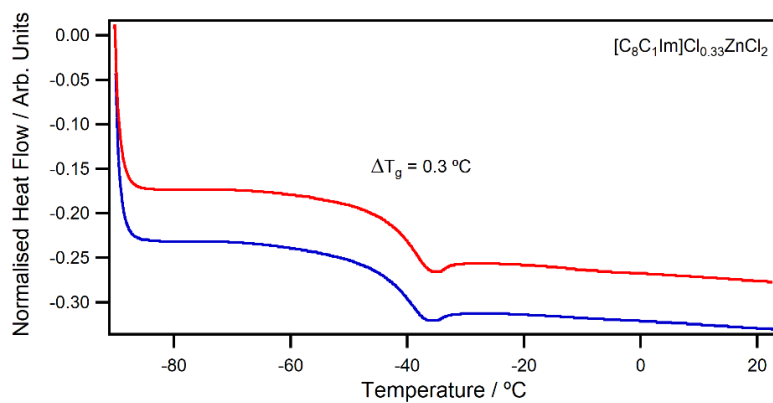

**Figure S228** Change in glass transition before (blue) and after (red) QI-MDSC experiments for  $[\text{C}_8\text{C}_1\text{Im}]\text{Cl}_{0.33}\text{ZnCl}_2$ .



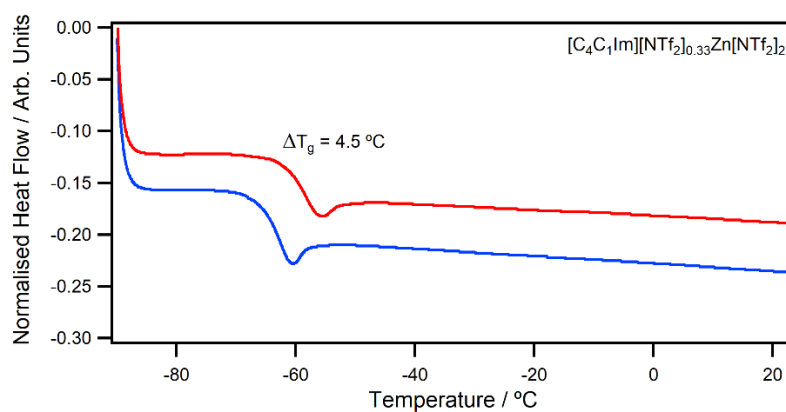

**Figure S229** Change in glass transition before (blue) and after (red) QI-MDSC experiments for  $[\text{C}_4\text{C}_1\text{Im}][\text{NTf}_2]_{0.33}\text{Zn}[\text{NTf}_2]_2$ .

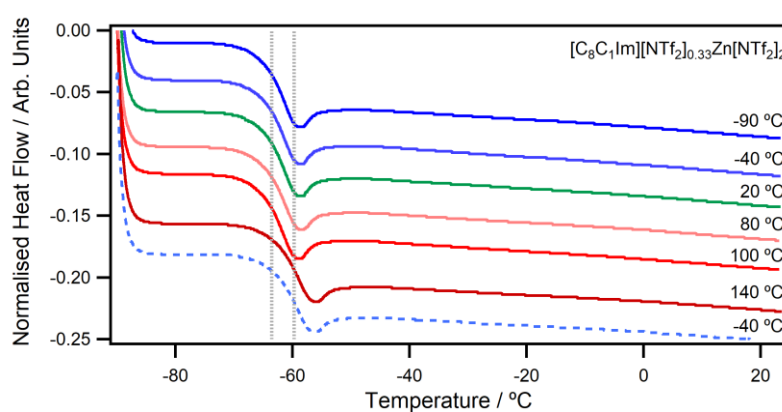

**Figure S230** Annealing experiments for  $[\text{C}_8\text{C}_1\text{Im}][\text{NTf}_2]_{0.33}\text{Zn}[\text{NTf}_2]_2$  held at temperature intervals for 60 minutes.

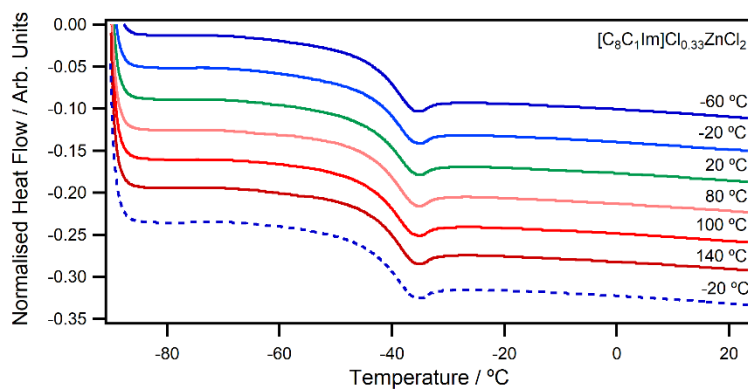

**Figure S231** Annealing experiments for  $[\text{C}_8\text{C}_1\text{Im}]\text{Cl}_{0.33}\text{ZnCl}_2$  held at temperature intervals for 60 minutes.

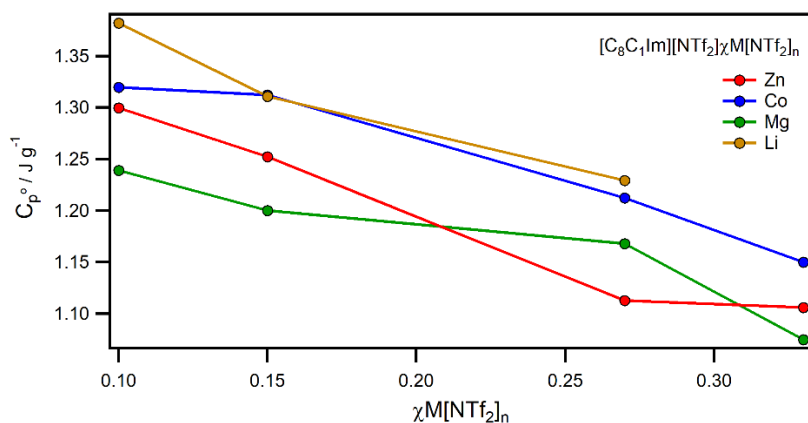

**Figure S232** Heat capacities of  $[C_8C_1Im][NTf_2]_\chi M[NTf_2]_n$  MILs measured from QI-MDSC experiments at 20°C.

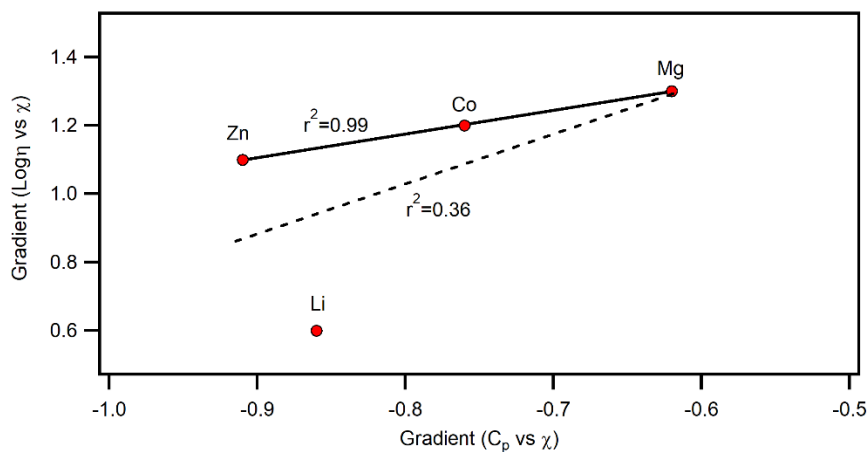

**Figure S233** Correlations of gradients taken from linear fits of logarithm of viscosity vs heat capacity against mole fraction of metal salts, with a fit to all (dashed) or only divalent metals (solid).

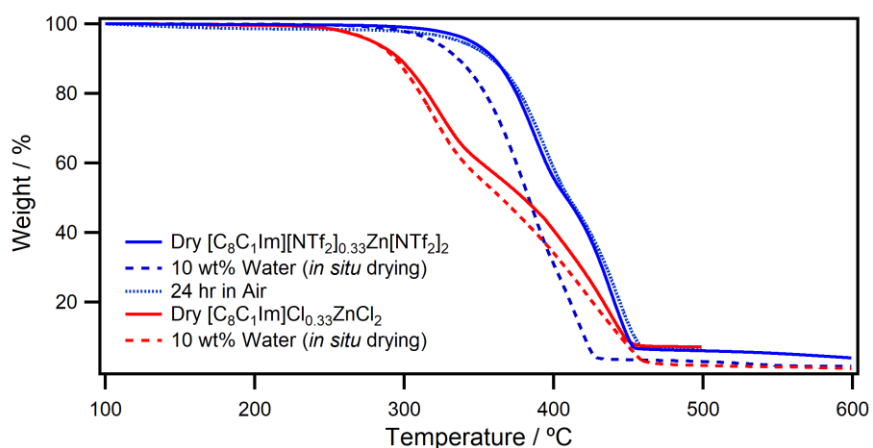

**Figure S234** TGA thermograms for pure  $[C_8C_1Im][NTf_2]_{0.33}Zn[NTf_2]_2$  (blue solid) and a 10% water mixture (blue dashed) compared to analogous  $[C_8C_1Im]Cl_{0.33}ZnCl_2$  MIL.

### 3. References

- 1 L. Bui-Le, C. J. Clarke, A. Bröhl, A. P. S. Brogan, J. A. J. Arpino, K. M. Polizzi and J. P. Hallett, *Commun Chem*, 2020, **3**, 1–9.
- 2 C. J. Clarke, L. Bui-Le and J. Hallett, *Analytical Methods*, 2020, **12**, 2244–2252.
- 3 C. Clarke, S. Hayama, A. Hawes, J. Hallett, T. Chamberlain, K. Lovelock and N. Besley, *J Phys Chem A*, **123**, 9552–9559.
- 4 (PDF) Vogel-Fulcher-Tammann behavior for Viscosity, [https://www.researchgate.net/publication/378184224\\_Vogel-Fulcher-Tammann\\_behavior\\_for\\_Viscosity?channel=doi&linkId=65cc9fa179007454978f99f6&showFulltext=true](https://www.researchgate.net/publication/378184224_Vogel-Fulcher-Tammann_behavior_for_Viscosity?channel=doi&linkId=65cc9fa179007454978f99f6&showFulltext=true), (accessed 30 May 2024).
- 5 J. M. Slattery, C. Daguene, P. J. Dyson, T. J. S. Schubert, I. Krossing, J. M. Slattery, I. Krossing, C. Daguene, J. Dyson and T. J. S. Schubert, *Angewandte Chemie International Edition*, 2007, **46**, 5384–5388.
- 6 Y. Marcus, *J Mol Liq*, 2015, **209**, 289–293.
- 7 C. N. Singman, *J Chem Educ*, 1984, **61**, 137–142.
- 8 G. Li and C. W. Monroe, *Front Energy Res*, 2021, **9**, 660081.
